# Supplementary material for: Methylation of MTHFR Moderates the Effect of Smoking on Genomewide Methylation Among Middle Age African Americans
Source: Front Genet. 2018 Dec 10;9:622. doi: 10.3389/fgene.2018.00622 (PMC6296342; doi:10.3389/fgene.2018.00622)
Supplement: Supplementary file 1 [file Data_Sheet_1.xlsx]

## Sheet: Supplemental Table 1.
		Hypo methylated index (205 loci)					Hyper methylated index (66 loci)
	Model	Model 1A		Model 2A			Model 1B		Model 2B
	Parameters	b	p-value	b	p-value		b	p-value	b	p-value
	Smoking consumption	-.021**	6.1e-05	-.020**	7.6e-05		.046**	3.9e-16	.045**	5.1e-16
	mMTHFR	-0.021	0.821	-.206†	0.057		-.411**	1.2e-05	-.295**	0.007
	Smoking × mMTHFR			.036**	0.002				-.022†	0.053
	Males	-0.017	0.838	-0.053	0.531		-0.073	0.384	-0.051	0.543
	Age	-.008†	0.055	-.009*	0.039		-0.001	0.957	0.001	0.996
	Diet	0.023	0.519	0.029	0.41		-0.036	0.313	-0.039	0.264
	CD8+T cells	-2.532**	1e-05	-2.331**	3.3e-05		-0.817	0.139	-.943†	0.088
	CD4+T cells	0.27	0.516	0.131	0.747		-.740†	0.072	-0.654	0.112
	Natural killer cells	-2.969**	3.6e-06	-2.866**	4.6e-06		1.171†	0.057	1.106†	0.071
	B cells	-3.307**	6.6e-13	-3.083**	9.1e-12		1.133**	0.008	.992*	0.02
	Monocytes	1.016*	0.049	.860†	0.089		-0.017	0.973	0.081	0.873
	Constant	1.339**	4.5e-05	1.356	2.4e-05		-0.065	0.838	-0.075	0.811
	R-square	0.449		0.48			0.449		0.46
	† p ≤ .10; * p ≤ .05; ** p ≤ .01 (two-tailed tests).
	Supplemental Table 1. Linear regression models examining association of self-reported smoking consumption and mMTHFR and their interaction on indices of overall hypo and hyper methylation in response to smoking controlling for demographic variables, diet, and major cell type variation, indicating robust interaction effects.

## Sheet: Supplemental Table 2
		cg19859270
	Model	Model 1		Model 2
	Parameters	b	p-value	b	p-value
	Smoking consumption	-.004**	8.6e-12	-.004**	6.8e-12
	mMTHFR	-.031**	0.004	-.054**	2.2e-05
	Smoking × mMTHFR			.004**	0.0009
	Males	-0.001	0.983	-0.005	0.633
	Age	-0.001	0.246	-0.001	0.195
	Diet	0.001	0.811	0.002	0.673
	CD8+T cells	-0.054	0.402	-0.029	0.645
	CD4+T cells	0.034	0.471	0.017	0.71
	Natural killer cells	-0.02	0.782	-0.007	0.92
	B cells	-.320**	5.9e-10	-.292**	7.3e-09
	Monocytes	.152**	0.011	.132*	0.022
	Constant	.890**	5.1e-57	.892**	1.1e-58
	R-square	0.465		0.5
	† p ≤ .10; * p ≤ .05; ** p ≤ .01 (two-tailed tests). N = 180.
	Supplemental Table 2. Linear regression of self-reported smoking consumption and mMTHFR and their interaction on Cg19859270, an index of GPR15 proliferation, controlling for demographic variables, diet and major cell type variation.

## Sheet: Supplemental Table 3
		Hypo methylated index (60 loci)					Hyper methylated index (1 locus)
	Model	Model 1A		Model 2A			Model 1B		Model 2B
	Parameters	b	p-value	b	p-value		b	p-value	b	p-value
	Smoking status	-.379**	2.9e-05	-.364**	1.7e-05		.569**	4.7e-05	.554**	4.7e-05
	mMTHFR	-0.184	0.101	-.652**	4.6e-06		-.702**	6.9e-05	-0.213	0.338
	Smoking status ×			.951**	6.3e-07				-.994**	0.00095
	mMTHFR
	Males	0.042	0.683	0.007	0.946		-0.088	0.58	-0.251	0.743
	Age	-.012*	0.024	-.013**	0.006		0.01	0.225	0.011	0.147
	Diet	0.035	0.412	0.035	0.381		-.130*	0.05	-.130*	0.044
	CD8+T cells	-2.576**	0.00017	-2.573**	5.9e-05		-1.708	0.101	-1.712†	0.09
	CD4+T cells	0.622	0.213	0.242	0.606		-0.316	0.681	0.081	0.915
	Natural killer cells	-3.396**	1e-05	-3.180**	9.6e-06		4.119**	0.00046	3.894**	0.00065
	B cells	-4.363**	6.6e-15	-3.834**	3.5e-13		1.978*	0.013	1.425†	0.07
	Monocytes	1.812**	0.004	1.249*	0.035		-1.432	0.136	-0.843	0.374
	Constant	1.513**	0.00013	1.707**	4.7e-06		-0.441	0.459	-0.645	0.268
	R-square	0.469		0.542			0.285		0.33
	† p ≤ .10; * p ≤ .05; ** p ≤ .01 (two-tailed tests).
	Supplement Table 3. Linear regression models examining association of self-reported smoking consumption and mMTHFR and their interaction on indices of overall hypo and hyper methylation in response to smoking controlling for demographics and cell type variation, indicating robust interaction effects. (Only loci that were significant after Bonferroni correction were used in each index)

## Sheet: Supplemental Table 4
caseid	cg00095276	cg00155844	cg00389785	cg00642607	cg00649216	cg00690392	cg00727386	cg00736283	cg00746487	cg00833661	cg01097768	cg01344787	cg01612443	cg01638829	cg01693063	cg01837661	cg01852611	cg01899089	cg01938570	cg01940273	cg02111705	cg02171500	cg02227015	cg02247175	cg02292066	cg02319016	cg02392575	cg02521854	cg02569236	cg02578836	cg02641288	cg02657160	cg02671915	cg02720697	cg02995567	cg03046325	cg03168249	cg03333116	cg03384915	cg03467813	cg03482600	cg03603505	cg03636183	cg03662571	cg03775901	cg03811905	cg03862705	cg03991871	cg04031757
1	0.748973	0.699252	0.468439	0.818647	0.783824	0.813043	0.663356	0.112218	0.831609	0.908404	0.430534	0.614163	0.152465	0.892633	0.192614	0.266692	0.529474	0.479713	0.857578	0.523203	0.152989	0.232841	0.216298	0.815224	0.258213	0.487461	0.205387	0.118754	0.211834	0.583995	0.284558	0.774864	0.726328	0.0486714	0.13191	0.128096	0.124266	0.81821	0.705508	0.54223	0.794483	0.89651	0.510575	0.83803	0.843197	0.754369	0.453779	0.825705	0.215204
2	0.705055	0.741305	0.591054	0.821949	0.836492	0.815754	0.73034	0.116225	0.85882	0.886384	0.425381	0.702309	0.20863	0.900829	0.18402	0.285129	0.609483	0.447124	0.870101	0.484347	0.11231	0.26928	0.138795	0.891052	0.203007	0.540892	0.200298	0.132815	0.190315	0.687563	0.368046	0.779049	0.774341	0.0583835	0.0937997	0.121428	0.132111	0.737722	0.717797	0.420187	0.764884	0.915738	0.618227	0.799959	0.834807	0.723371	0.4498	0.798578	0.212639
3	0.682286	0.727167	0.546007	0.836686	0.802704	0.820377	0.668369	0.130716	0.821586	0.891093	0.549543	0.660011	0.195445	0.898254	0.160923	0.332756	0.575042	0.496028	0.841298	0.464656	0.115127	0.268006	0.160029	0.821777	0.197834	0.579424	0.194768	0.157343	0.176677	0.679602	0.355664	0.788261	0.762776	0.0602854	0.115143	0.128116	0.140722	0.795399	0.714515	0.477072	0.796698	0.901563	0.575014	0.822414	0.849404	0.734432	0.460264	0.800213	0.207268
4	0.760301	0.743462	0.599087	0.838452	0.852479	0.812908	0.702933	0.156815	0.836576	0.888536	0.459783	0.621123	0.195815	0.901226	0.148059	0.345629	0.611908	0.453429	0.798016	0.538961	0.111243	0.29177	0.176015	0.856364	0.167645	0.725698	0.20253	0.131683	0.195902	0.652863	0.354946	0.738581	0.737471	0.0374137	0.124577	0.15285	0.160521	0.816476	0.80164	0.458194	0.755829	0.897962	0.643937	0.826081	0.844237	0.753553	0.454287	0.806161	0.194534
5	0.811259	0.715499	0.451236	0.872291	0.755371	0.811337	0.688106	0.156154	0.809021	0.906396	0.580503	0.627979	0.205436	0.871019	0.210397	0.310857	0.535453	0.478541	0.850795	0.624247	0.172012	0.29441	0.231094	0.829826	0.306973	0.556284	0.230299	0.147171	0.176287	0.620586	0.349811	0.826678	0.701851	0.0373027	0.13894	0.148791	0.159111	0.816747	0.781422	0.622283	0.8154	0.894969	0.64293	0.825781	0.865991	0.75895	0.47199	0.826917	0.226365
6	0.753904	0.747063	0.634346	0.817127	0.864412	0.820159	0.673054	0.146219	0.830849	0.890598	0.440458	0.672809	0.187442	0.896092	0.130429	0.352271	0.632862	0.496402	0.842474	0.496925	0.126253	0.266386	0.140066	0.83699	0.140264	0.734705	0.217735	0.12186	0.188199	0.710777	0.365324	0.727919	0.769431	0.0603405	0.100859	0.151628	0.170537	0.746602	0.750195	0.470118	0.782957	0.911029	0.554283	0.814312	0.827317	0.730077	0.469078	0.736151	0.195652
7	0.726273	0.715182	0.510527	0.852249	0.834566	0.818547	0.629831	0.127427	0.810339	0.878102	0.515302	0.608021	0.153989	0.87851	0.204779	0.307889	0.555559	0.423364	0.877845	0.460109	0.171594	0.257004	0.20357	0.82089	0.254492	0.499218	0.202282	0.125394	0.2052	0.627778	0.352413	0.744781	0.713191	0.0511103	0.137056	0.125443	0.132106	0.800338	0.718252	0.547389	0.793608	0.916756	0.487365	0.847277	0.859969	0.796178	0.462234	0.798348	0.218616
8	0.637463	0.722412	0.497652	0.809672	0.795225	0.865324	0.645372	0.104863	0.815271	0.881721	0.571227	0.620476	0.150868	0.903581	0.208069	0.342933	0.591236	0.508723	0.857394	0.619822	0.126037	0.240328	0.158099	0.831578	0.181522	0.562697	0.188056	0.108701	0.150995	0.654379	0.312953	0.820853	0.746933	0.0526057	0.115079	0.104374	0.127382	0.812064	0.648606	0.500837	0.827359	0.902817	0.69618	0.810878	0.858728	0.764321	0.475197	0.800116	0.183477
9	0.79973	0.713178	0.427257	0.8289	0.804929	0.839261	0.692161	0.128574	0.811376	0.896914	0.483935	0.653236	0.168625	0.868704	0.178517	0.304614	0.575348	0.496645	0.857072	0.559944	0.115579	0.249853	0.169941	0.856289	0.227823	0.625223	0.185188	0.122584	0.215286	0.643462	0.355882	0.803011	0.752331	0.0396489	0.116682	0.132927	0.144229	0.821459	0.794322	0.467621	0.821862	0.895584	0.592774	0.838656	0.842512	0.770049	0.480841	0.843246	0.209109
10	0.725619	0.696382	0.41444	0.837008	0.753254	0.832053	0.64548	0.119267	0.804817	0.916563	0.615689	0.61208	0.169471	0.877094	0.263658	0.290559	0.494809	0.540875	0.857232	0.563462	0.165105	0.259259	0.23922	0.790079	0.25135	0.480872	0.173829	0.0974467	0.190441	0.640918	0.323849	0.816057	0.721724	0.0452018	0.146332	0.12718	0.129149	0.817955	0.7941	0.614338	0.79513	0.900387	0.658601	0.859489	0.862716	0.773514	0.47299	0.800788	0.179538
11	0.671655	0.754473	0.575253	0.804341	0.888382	0.819142	0.672865	0.122281	0.84877	0.89174	0.350265	0.666712	0.164925	0.891985	0.149598	0.325401	0.669197	0.434479	0.842856	0.476913	0.114546	0.249741	0.163222	0.875083	0.172198	0.733334	0.175535	0.102692	0.194714	0.655765	0.332063	0.764157	0.769537	0.0542964	0.104362	0.112706	0.126806	0.792563	0.688275	0.425628	0.761535	0.917925	0.497338	0.793248	0.867054	0.732125	0.452204	0.53382	0.199024
12	0.701369	0.712958	0.373419	0.813423	0.737496	0.804515	0.631851	0.104964	0.796978	0.902438	0.540749	0.622262	0.137939	0.864995	0.235835	0.26131	0.513079	0.514569	0.857947	0.524437	0.123566	0.234199	0.211278	0.766369	0.263507	0.46019	0.17451	0.0953725	0.189673	0.616989	0.309276	0.821031	0.727099	0.0373696	0.128257	0.11643	0.130365	0.78818	0.786077	0.557059	0.81306	0.886654	0.707396	0.813026	0.864869	0.760417	0.478554	0.878486	0.1729
13	0.726437	0.701051	0.552812	0.829622	0.807317	0.814689	0.679255	0.148437	0.825885	0.921167	0.532386	0.647247	0.171868	0.879477	0.185749	0.335294	0.575943	0.509761	0.859661	0.452619	0.153111	0.291906	0.202741	0.764624	0.197156	0.535332	0.207697	0.128727	0.21425	0.647868	0.332062	0.801056	0.74401	0.0603596	0.132642	0.134628	0.148195	0.793233	0.676136	0.532331	0.834566	0.905553	0.402083	0.808808	0.859027	0.780282	0.450076	0.81465	0.219506
14	0.688929	0.72641	0.628104	0.832596	0.857396	0.820141	0.726175	0.157987	0.856718	0.895796	0.484825	0.663174	0.223248	0.893174	0.145351	0.344062	0.616577	0.508175	0.84402	0.507461	0.118638	0.306051	0.16345	0.838185	0.194115	0.676259	0.224298	0.164259	0.193576	0.704909	0.378785	0.790984	0.758572	0.074531	0.102361	0.167127	0.164337	0.778354	0.710927	0.49302	0.782478	0.918003	0.604091	0.85213	0.837526	0.77012	0.445774	0.836134	0.224832
15	0.742654	0.746645	0.562524	0.787071	0.831518	0.804075	0.686482	0.12905	0.824763	0.888527	0.500166	0.672106	0.159601	0.898103	0.185752	0.336709	0.611421	0.491316	0.839975	0.532746	0.127038	0.293955	0.204454	0.771856	0.201563	0.508869	0.23536	0.142148	0.212947	0.649911	0.367632	0.824762	0.773415	0.0565789	0.127233	0.137396	0.165246	0.801879	0.733436	0.486519	0.762266	0.908233	0.549162	0.812948	0.83272	0.725608	0.458968	0.824706	0.219506
16	0.704527	0.724953	0.479174	0.852128	0.803735	0.829742	0.716864	0.15705	0.830813	0.87883	0.549797	0.605463	0.214738	0.901943	0.198675	0.352331	0.549912	0.462535	0.837984	0.509772	0.14785	0.295895	0.202052	0.854796	0.23102	0.484338	0.226637	0.128248	0.194242	0.659303	0.359341	0.75593	0.744862	0.0730988	0.134776	0.129771	0.154933	0.816515	0.709789	0.522949	0.825239	0.902998	0.445185	0.836258	0.849658	0.763174	0.455002	0.801956	0.21345
17	0.69206	0.713785	0.502282	0.821484	0.781656	0.810582	0.692759	0.13963	0.841078	0.880752	0.437826	0.623062	0.207296	0.897954	0.173121	0.311326	0.590498	0.487171	0.848443	0.485807	0.144519	0.280355	0.179614	0.817146	0.22662	0.541773	0.236009	0.134303	0.182077	0.665309	0.376526	0.719146	0.752261	0.0660318	0.12377	0.15527	0.147285	0.785667	0.704688	0.483031	0.791352	0.912324	0.580661	0.816914	0.849373	0.724539	0.470525	0.798532	0.213111
18	0.77716	0.734919	0.572607	0.844204	0.831402	0.813442	0.662321	0.142036	0.813106	0.879719	0.518181	0.638587	0.182251	0.903472	0.154999	0.326577	0.595329	0.497587	0.836957	0.593374	0.1411	0.274704	0.164841	0.812444	0.194866	0.569262	0.229097	0.13212	0.180064	0.684305	0.372032	0.815208	0.749032	0.0499387	0.11599	0.153639	0.165296	0.785012	0.787061	0.513426	0.826089	0.90311	0.688588	0.835138	0.835115	0.745896	0.455959	0.683132	0.207123
19	0.671952	0.756599	0.636258	0.824751	0.865302	0.818748	0.681192	0.179585	0.856237	0.884912	0.646508	0.702594	0.236712	0.915868	0.184889	0.35474	0.653117	0.428536	0.860621	0.554214	0.106157	0.320558	0.148386	0.84175	0.19737	0.692611	0.252599	0.146043	0.23725	0.716645	0.383957	0.821958	0.749873	0.06863	0.114526	0.158204	0.18389	0.790916	0.789419	0.564138	0.786976	0.90434	0.632056	0.831142	0.856049	0.750544	0.427796	0.817064	0.223763
20	0.813546	0.754782	0.59479	0.837973	0.868477	0.820565	0.665087	0.155277	0.828217	0.897138	0.523546	0.672185	0.205956	0.898071	0.136462	0.362695	0.584813	0.518494	0.872168	0.487797	0.147389	0.303149	0.183658	0.896497	0.224416	0.672718	0.244647	0.146955	0.218858	0.647142	0.372569	0.776614	0.732766	0.0413281	0.12326	0.158979	0.188142	0.816907	0.795677	0.523201	0.782218	0.886418	0.579918	0.824536	0.866245	0.769859	0.452336	0.795791	0.219848
21	0.741727	0.709715	0.508195	0.823796	0.818467	0.844974	0.686428	0.157861	0.827889	0.904947	0.60381	0.609207	0.177731	0.880185	0.195891	0.334409	0.550972	0.498154	0.875661	0.437557	0.182547	0.302688	0.208043	0.83172	0.270025	0.542283	0.219784	0.120592	0.199708	0.624124	0.341751	0.778395	0.726155	0.0574617	0.152611	0.137603	0.157146	0.827988	0.745916	0.719786	0.820429	0.904056	0.541633	0.868038	0.861825	0.774297	0.458891	0.73694	0.201894
22	0.826542	0.719492	0.557006	0.83236	0.829529	0.818926	0.702916	0.158032	0.809893	0.881909	0.397418	0.656315	0.218525	0.878486	0.192819	0.308055	0.595716	0.51718	0.832211	0.530609	0.146879	0.291376	0.166848	0.852754	0.214741	0.55276	0.227592	0.13775	0.222918	0.671459	0.371884	0.787631	0.753451	0.0431297	0.12914	0.163753	0.170097	0.815944	0.703401	0.505919	0.788798	0.908967	0.711782	0.826535	0.831823	0.748279	0.46686	0.871901	0.202646
23	0.666936	0.750578	0.669864	0.810081	0.861741	0.809191	0.707367	0.131909	0.860041	0.852581	0.497486	0.684408	0.217178	0.916778	0.156723	0.316788	0.614497	0.49215	0.858213	0.569931	0.119683	0.289122	0.155342	0.87821	0.165725	0.669449	0.227186	0.143225	0.194323	0.66822	0.340514	0.807407	0.773453	0.102716	0.110542	0.160382	0.158034	0.765488	0.722864	0.429666	0.767737	0.915271	0.640524	0.812357	0.820128	0.734651	0.446138	0.852563	0.200355
24	0.636478	0.747204	0.662486	0.80919	0.893044	0.811592	0.755409	0.141968	0.858121	0.887804	0.390279	0.719635	0.207136	0.924012	0.125062	0.370372	0.699117	0.419791	0.844233	0.524276	0.10939	0.302305	0.134896	0.888516	0.154853	0.774834	0.253915	0.16117	0.211696	0.715288	0.372	0.751484	0.813809	0.076538	0.0781983	0.158345	0.151211	0.791177	0.716223	0.402983	0.774009	0.910067	0.566055	0.806598	0.834406	0.733154	0.460735	0.799549	0.228647
25	0.764479	0.711919	0.634736	0.861798	0.854465	0.795289	0.660712	0.151215	0.831758	0.89743	0.591857	0.653721	0.234145	0.892647	0.168133	0.388758	0.598069	0.440862	0.868564	0.47948	0.161936	0.283188	0.183757	0.851997	0.215492	0.554921	0.224544	0.153331	0.251567	0.681888	0.371372	0.769956	0.730093	0.055694	0.139741	0.167366	0.168046	0.793318	0.783451	0.627151	0.835885	0.905865	0.553521	0.855003	0.84503	0.739281	0.441323	0.755416	0.218553
26	0.662676	0.719054	0.497439	0.811793	0.807529	0.833027	0.629646	0.102047	0.819296	0.879164	0.506129	0.616965	0.177891	0.899317	0.187352	0.334302	0.550239	0.52251	0.873459	0.644583	0.133563	0.233933	0.205457	0.823613	0.220841	0.448867	0.180583	0.101681	0.155646	0.64156	0.329339	0.7926	0.757695	0.0400772	0.108243	0.11474	0.122398	0.80655	0.726851	0.52332	0.813399	0.919765	0.685492	0.835109	0.866793	0.766391	0.494613	0.829597	0.213667
27	0.650197	0.721994	0.594112	0.82066	0.824556	0.834565	0.683309	0.158185	0.859927	0.891199	0.47493	0.649467	0.229941	0.902929	0.171611	0.327551	0.607123	0.45232	0.854725	0.509279	0.128695	0.285929	0.173461	0.843028	0.190408	0.57043	0.239565	0.167803	0.202333	0.691736	0.358708	0.751994	0.785583	0.060449	0.120241	0.172036	0.160358	0.797703	0.659968	0.495892	0.822095	0.917704	0.440217	0.818599	0.854053	0.745318	0.456677	0.79623	0.222963
28	0.732396	0.745078	0.610139	0.877765	0.84278	0.827835	0.708445	0.171299	0.818756	0.903212	0.564974	0.678565	0.216503	0.895648	0.158894	0.354047	0.577674	0.525824	0.861568	0.562364	0.139611	0.316828	0.178927	0.783913	0.220653	0.551793	0.239845	0.16058	0.195931	0.686752	0.389542	0.789801	0.766985	0.055564	0.131981	0.158774	0.164501	0.786699	0.749453	0.525278	0.826788	0.883946	0.693719	0.8368	0.857627	0.756067	0.473266	0.842114	0.22079
29	0.738293	0.747314	0.607512	0.824774	0.888902	0.8098	0.687266	0.152232	0.839303	0.880047	0.427248	0.697486	0.197501	0.901616	0.12277	0.399739	0.673097	0.463752	0.83124	0.525132	0.0969972	0.288944	0.161292	0.874141	0.167735	0.811823	0.205439	0.131317	0.222326	0.692482	0.358928	0.774767	0.779879	0.0512169	0.119862	0.157161	0.167267	0.802064	0.739868	0.484565	0.791801	0.933946	0.547403	0.813408	0.837395	0.751752	0.418885	0.802131	0.200658
30	0.683588	0.732398	0.486386	0.774773	0.774051	0.822471	0.689065	0.12809	0.825081	0.88576	0.544901	0.640841	0.209373	0.889868	0.216664	0.304776	0.539334	0.443973	0.862454	0.503271	0.11966	0.274591	0.1648	0.833176	0.206915	0.528787	0.197278	0.113299	0.205253	0.671921	0.360049	0.806599	0.75859	0.054847	0.106974	0.131637	0.142959	0.775714	0.785875	0.560503	0.808632	0.922738	0.634152	0.842425	0.842308	0.728584	0.468043	0.644121	0.215306
31	0.776561	0.717542	0.582216	0.846598	0.828837	0.849913	0.650605	0.149412	0.820463	0.895449	0.541176	0.664245	0.211673	0.872708	0.182581	0.324148	0.590095	0.418785	0.824448	0.533084	0.148734	0.275104	0.206215	0.823433	0.190017	0.59445	0.227992	0.141584	0.212474	0.675988	0.371676	0.767788	0.752892	0.0357459	0.136755	0.159023	0.184319	0.834259	0.81249	0.53935	0.829653	0.901902	0.530797	0.839917	0.852842	0.764618	0.469712	0.713543	0.216144
32	0.77224	0.713009	0.444094	0.843026	0.766596	0.820757	0.660436	0.139707	0.804844	0.887187	0.538232	0.621276	0.212235	0.850326	0.2352	0.277769	0.555062	0.465502	0.846477	0.610211	0.1492	0.256916	0.177581	0.811943	0.276705	0.530338	0.201407	0.127475	0.181802	0.639612	0.319385	0.793628	0.755447	0.0348663	0.135187	0.148286	0.15043	0.792715	0.770486	0.627986	0.785386	0.891882	0.691134	0.83606	0.861444	0.744267	0.476964	0.805452	0.204143
33	0.824732	0.709876	0.403351	0.869156	0.729864	0.83059	0.656263	0.131208	0.782125	0.893506	0.562097	0.611279	0.154531	0.86432	0.245587	0.300863	0.489256	0.509295	0.852917	0.498271	0.142086	0.250866	0.19214	0.789199	0.243653	0.439077	0.209435	0.124993	0.171201	0.66769	0.344485	0.797103	0.736932	0.0439691	0.138725	0.142336	0.145401	0.783424	0.843506	0.57761	0.818025	0.890163	0.683467	0.844897	0.839079	0.773327	0.511384	0.8148	0.174461
34	0.746734	0.71956	0.464739	0.801929	0.802826	0.812075	0.657762	0.0930362	0.816536	0.864304	0.443959	0.629053	0.139674	0.887306	0.2126	0.28509	0.596644	0.466375	0.871404	0.497458	0.115692	0.209967	0.165601	0.796131	0.235057	0.542584	0.145353	0.0787083	0.184487	0.641649	0.310002	0.788326	0.733692	0.0463437	0.124922	0.0938028	0.115216	0.790379	0.723623	0.460251	0.749591	0.893335	0.656331	0.798966	0.861554	0.748222	0.475064	0.745358	0.180214
35	0.797363	0.744047	0.597739	0.839058	0.900106	0.813655	0.693122	0.14682	0.821002	0.87409	0.4104	0.700042	0.170384	0.887876	0.134935	0.399251	0.657208	0.435858	0.803929	0.518406	0.0978529	0.263132	0.136075	0.838068	0.140641	0.721517	0.195671	0.128699	0.221521	0.71051	0.35655	0.716502	0.761579	0.0385636	0.118323	0.154687	0.148143	0.791027	0.717579	0.41589	0.808214	0.890481	0.636974	0.827595	0.832479	0.743139	0.450689	0.784759	0.189313
36	0.733059	0.746547	0.608526	0.817392	0.883152	0.802625	0.687816	0.154157	0.855076	0.886891	0.437759	0.681831	0.206846	0.907501	0.151766	0.334833	0.64424	0.433365	0.823182	0.514835	0.11539	0.325061	0.153071	0.831365	0.173051	0.589315	0.234888	0.141487	0.216719	0.718516	0.368701	0.768611	0.750655	0.0564132	0.102361	0.148217	0.162256	0.768247	0.74414	0.456586	0.78035	0.908258	0.630853	0.821361	0.840446	0.712918	0.448177	0.769346	0.235631
37	0.756608	0.757036	0.605824	0.819553	0.884763	0.806884	0.679988	0.149918	0.83932	0.872181	0.483437	0.708662	0.195608	0.902661	0.118136	0.427416	0.697184	0.469936	0.82877	0.558238	0.107971	0.28818	0.152201	0.917577	0.139172	0.804922	0.217212	0.143118	0.218764	0.728101	0.342693	0.793427	0.815872	0.054568	0.116789	0.159794	0.170501	0.785027	0.83352	0.536724	0.776156	0.88976	0.659726	0.814627	0.842707	0.74212	0.442416	0.84129	0.206907
38	0.652979	0.762867	0.606475	0.750109	0.864492	0.811709	0.659586	0.117959	0.837881	0.877769	0.476732	0.63013	0.178316	0.89671	0.171207	0.3408	0.675793	0.451421	0.846754	0.542483	0.104553	0.240404	0.149252	0.839906	0.170597	0.640947	0.170308	0.0845678	0.193316	0.681479	0.358945	0.753175	0.740265	0.100068	0.11397	0.131255	0.119318	0.800524	0.629969	0.473096	0.829291	0.910923	0.470095	0.800288	0.837005	0.758214	0.45692	0.798662	0.200452
39	0.743047	0.754748	0.578863	0.813609	0.87574	0.818255	0.663563	0.133421	0.842202	0.900153	0.453804	0.664035	0.180201	0.902624	0.13807	0.396054	0.650009	0.447259	0.846335	0.511486	0.0979934	0.288329	0.184963	0.848801	0.131176	0.762403	0.206	0.131013	0.201884	0.679646	0.348317	0.747752	0.773775	0.0558678	0.105877	0.120297	0.156808	0.811809	0.679583	0.434986	0.793044	0.900366	0.55654	0.820823	0.849669	0.747039	0.457094	0.735626	0.208847
40	0.792002	0.719761	0.571495	0.840484	0.842489	0.81873	0.674764	0.148394	0.85028	0.887857	0.499045	0.676083	0.178943	0.882131	0.166931	0.31336	0.650276	0.481118	0.862197	0.495145	0.164324	0.278832	0.166637	0.88182	0.235862	0.572055	0.221178	0.132608	0.216419	0.6852	0.348862	0.735689	0.733045	0.0445693	0.133469	0.157957	0.157237	0.822787	0.821733	0.552334	0.798875	0.901255	0.548294	0.827042	0.838824	0.757723	0.469025	0.797719	0.215362
41	0.719294	0.748807	0.577771	0.841704	0.866669	0.83653	0.659213	0.115617	0.838389	0.874389	0.535538	0.6732	0.178044	0.885856	0.138785	0.392521	0.685767	0.445847	0.850646	0.56761	0.0840563	0.246098	0.166863	0.86134	0.151446	0.73276	0.200913	0.0976964	0.180239	0.681471	0.322135	0.746176	0.737899	0.0495756	0.0978492	0.128678	0.128684	0.816107	0.725646	0.457614	0.78644	0.901651	0.649077	0.833877	0.830414	0.766476	0.42926	0.796346	0.202474
42	0.855554	0.734379	0.566646	0.854413	0.859113	0.830587	0.664715	0.148199	0.851962	0.877232	0.456878	0.69183	0.192549	0.90353	0.169446	0.343245	0.600116	0.442868	0.841865	0.487487	0.130574	0.310831	0.177207	0.866262	0.199881	0.614636	0.203479	0.120199	0.203166	0.639067	0.346002	0.745971	0.724912	0.0476812	0.11584	0.153192	0.177936	0.816663	0.75898	0.559281	0.790282	0.913755	0.571915	0.822384	0.812322	0.763813	0.446304	0.729525	0.21201
43	0.702279	0.77676	0.661103	0.83293	0.903858	0.80396	0.713351	0.16581	0.857091	0.88964	0.573094	0.691588	0.232681	0.919886	0.151875	0.402024	0.663685	0.494048	0.860219	0.499989	0.119428	0.308309	0.164031	0.892273	0.189199	0.705113	0.243913	0.150084	0.223244	0.709108	0.354167	0.7787	0.783766	0.0685553	0.101275	0.164839	0.181124	0.795306	0.666504	0.385758	0.834586	0.918107	0.428324	0.83116	0.837694	0.69221	0.435697	0.810102	0.262854
44	0.716111	0.698933	0.536405	0.836754	0.742439	0.8246	0.691216	0.160418	0.818902	0.876215	0.505077	0.64551	0.212744	0.893044	0.193159	0.323695	0.51662	0.536325	0.845736	0.584418	0.165978	0.293571	0.197553	0.818335	0.246745	0.485471	0.254094	0.15292	0.174615	0.64254	0.367419	0.776114	0.756268	0.0825688	0.14816	0.150739	0.165751	0.794523	0.682043	0.580785	0.818204	0.902595	0.512571	0.847763	0.871725	0.755504	0.474675	0.828414	0.23056
45	0.763059	0.737148	0.607281	0.844042	0.860551	0.820265	0.674506	0.150912	0.85465	0.861617	0.479555	0.639118	0.179987	0.896709	0.158637	0.326036	0.622565	0.420489	0.813032	0.458584	0.132613	0.277543	0.170726	0.837777	0.15901	0.651014	0.225118	0.124497	0.228508	0.656868	0.353764	0.761429	0.735337	0.0499289	0.10808	0.13601	0.141707	0.794427	0.748958	0.516333	0.781709	0.910803	0.524733	0.825173	0.842952	0.739896	0.426729	0.729678	0.207621
46	0.747181	0.7209	0.554895	0.841706	0.872305	0.822309	0.633206	0.132661	0.834689	0.882949	0.497679	0.67562	0.197442	0.888318	0.161314	0.36845	0.590936	0.545412	0.853164	0.566543	0.121578	0.302093	0.16657	0.796254	0.205279	0.570819	0.214562	0.125698	0.220169	0.702416	0.350052	0.816001	0.761392	0.0370001	0.124752	0.144647	0.149822	0.812441	0.846767	0.586971	0.829969	0.904325	0.651284	0.824144	0.851162	0.764691	0.468233	0.868922	0.186129
47	0.677657	0.757563	0.557714	0.828746	0.837759	0.831669	0.65529	0.13959	0.8538	0.887007	0.509028	0.665517	0.197288	0.873302	0.159105	0.35004	0.595384	0.452689	0.860462	0.52345	0.134581	0.26978	0.199538	0.868729	0.211137	0.597768	0.221037	0.108573	0.209559	0.648972	0.344047	0.759833	0.752207	0.048914	0.122452	0.132815	0.146626	0.819687	0.743761	0.557718	0.799342	0.899694	0.613701	0.841376	0.848488	0.783439	0.461226	0.796914	0.187932
48	0.762122	0.727099	0.483911	0.740777	0.759151	0.789438	0.727702	0.171192	0.83781	0.832637	0.316338	0.657947	0.432889	0.889915	0.302753	0.294338	0.708252	0.345572	0.813865	0.494871	0.258448	0.303867	0.294563	0.870158	0.482991	0.619387	0.235409	0.156052	0.455887	0.643467	0.375661	0.714072	0.704105	0.0602677	0.0976451	0.156822	0.17042	0.740853	0.758707	0.299239	0.625434	0.935519	0.609634	0.687082	0.885263	0.632409	0.427375	0.718089	0.197232
49	0.720336	0.769933	0.592278	0.81892	0.868028	0.825371	0.735894	0.160122	0.845398	0.88328	0.519407	0.682165	0.221174	0.90536	0.125369	0.306083	0.647978	0.425217	0.82665	0.499219	0.1107	0.301416	0.128661	0.839333	0.155142	0.650712	0.234152	0.157851	0.230443	0.7017	0.395531	0.783662	0.772459	0.052389	0.0969141	0.151491	0.21212	0.791672	0.725151	0.459643	0.80369	0.918334	0.479639	0.808794	0.830537	0.713247	0.43494	0.782683	0.252232
50	0.818502	0.703773	0.45199	0.81624	0.775108	0.831413	0.690051	0.12911	0.776183	0.871195	0.401365	0.673252	0.145016	0.853555	0.171669	0.30097	0.529145	0.514998	0.933005	0.636152	0.145095	0.258117	0.168331	0.765053	0.270059	0.481504	0.204093	0.118936	0.2463	0.652163	0.31943	0.8182	0.732634	0.0455143	0.147074	0.123831	0.145416	0.806392	0.840421	0.476988	0.788209	0.88632	0.698093	0.837457	0.809999	0.755834	0.467932	0.86168	0.242307
51	0.71953	0.747976	0.482659	0.820151	0.808286	0.8399	0.640839	0.0899181	0.841546	0.899078	0.562363	0.595648	0.147221	0.876845	0.235694	0.307423	0.520847	0.470302	0.850477	0.622152	0.086428	0.217211	0.205799	0.820562	0.237024	0.529884	0.174196	0.080878	0.181082	0.656576	0.317025	0.804651	0.746978	0.0390259	0.128095	0.112014	0.114713	0.81984	0.771237	0.456983	0.801126	0.905106	0.683888	0.831892	0.841685	0.768757	0.479316	0.827202	0.168118
52	0.677631	0.711393	0.493529	0.779411	0.824333	0.815705	0.655061	0.108008	0.795355	0.871492	0.425317	0.644681	0.13844	0.881488	0.1872	0.317264	0.549426	0.503313	0.861405	0.602169	0.16726	0.232825	0.211561	0.793651	0.238167	0.513906	0.163937	0.103091	0.195734	0.643034	0.317488	0.80177	0.743938	0.0688018	0.129623	0.11894	0.11865	0.787178	0.714302	0.546513	0.771362	0.90119	0.751769	0.809607	0.826889	0.779554	0.460911	0.877698	0.209738
53	0.724238	0.705427	0.533772	0.842874	0.810985	0.806823	0.698973	0.17686	0.838906	0.892101	0.600604	0.645769	0.260879	0.88886	0.207643	0.318799	0.577622	0.403258	0.833952	0.485327	0.168995	0.290711	0.215114	0.807683	0.238874	0.457057	0.251782	0.156306	0.222275	0.645606	0.372312	0.784837	0.726482	0.0885187	0.133282	0.163678	0.157451	0.785464	0.729535	0.524248	0.785136	0.896791	0.426408	0.82882	0.834475	0.735749	0.442205	0.751246	0.210331
54	0.734088	0.71722	0.646259	0.821242	0.876085	0.830515	0.695664	0.109775	0.830999	0.877086	0.484478	0.689377	0.161268	0.892676	0.134222	0.375705	0.641913	0.437729	0.867148	0.520839	0.105007	0.246068	0.183005	0.847711	0.169389	0.772017	0.186498	0.110204	0.189619	0.655664	0.320922	0.757494	0.784225	0.045096	0.10778	0.123415	0.138231	0.800053	0.704491	0.454619	0.785252	0.909102	0.512715	0.7866	0.867412	0.759357	0.427459	0.765381	0.190813
55	0.759294	0.726733	0.659886	0.829485	0.861558	0.803409	0.686392	0.128264	0.829157	0.873782	0.439307	0.683144	0.170068	0.903237	0.174082	0.372254	0.634886	0.520566	0.850311	0.534654	0.112678	0.271386	0.147359	0.868805	0.131869	0.659753	0.207611	0.109443	0.227033	0.680886	0.335685	0.788631	0.785257	0.0376624	0.11533	0.135681	0.145744	0.796534	0.791018	0.495009	0.768903	0.904963	0.614263	0.801631	0.835455	0.771615	0.430824	0.853951	0.195352
56	0.679784	0.763778	0.712665	0.808267	0.893153	0.792165	0.74619	0.147463	0.855281	0.837152	0.496287	0.703935	0.216367	0.914073	0.119255	0.388428	0.665737	0.492682	0.825438	0.47756	0.0895846	0.283883	0.139482	0.856738	0.178722	0.776015	0.214586	0.156075	0.186715	0.70184	0.354114	0.734059	0.824858	0.0876953	0.0910944	0.155487	0.156602	0.760345	0.663221	0.522418	0.812927	0.908616	0.49676	0.825075	0.856174	0.730752	0.456131	0.764944	0.223171
57	0.694084	0.739799	0.591515	0.831497	0.854245	0.829211	0.731867	0.139898	0.868373	0.894	0.444224	0.666526	0.172619	0.910496	0.14753	0.314689	0.600261	0.462797	0.841535	0.461985	0.107166	0.270239	0.135841	0.844561	0.167402	0.72817	0.208562	0.135984	0.192933	0.674968	0.368146	0.780243	0.774705	0.0709376	0.102012	0.156045	0.151622	0.78859	0.643769	0.455396	0.785107	0.914011	0.438338	0.813889	0.846786	0.746473	0.452097	0.753134	0.259018
58	0.722187	0.721699	0.542553	0.838551	0.816454	0.818174	0.659585	0.121339	0.831498	0.905023	0.411036	0.667472	0.128138	0.903738	0.189019	0.297672	0.585578	0.454645	0.872064	0.52107	0.138138	0.223786	0.188862	0.839801	0.206847	0.574961	0.157738	0.0950218	0.183659	0.645452	0.316404	0.775469	0.739752	0.045323	0.136338	0.109995	0.132994	0.835333	0.780933	0.524905	0.770618	0.89857	0.609121	0.83684	0.851007	0.757532	0.458649	0.797444	0.200237
59	0.76192	0.708834	0.473978	0.851371	0.729935	0.833896	0.61714	0.110927	0.797609	0.888103	0.552659	0.639893	0.152	0.883366	0.23596	0.278116	0.539175	0.517575	0.852583	0.554394	0.141907	0.259446	0.184813	0.797557	0.217905	0.47113	0.204824	0.111177	0.180872	0.642886	0.346776	0.822704	0.733199	0.0354754	0.15738	0.135378	0.143678	0.804722	0.790539	0.497765	0.806484	0.903132	0.696859	0.83418	0.86764	0.752613	0.468067	0.822081	0.182394
60	0.664939	0.747147	0.604096	0.849732	0.86779	0.821034	0.724981	0.155236	0.846003	0.869997	0.531938	0.697062	0.22696	0.904374	0.159039	0.402756	0.635124	0.49177	0.846457	0.600877	0.137577	0.312481	0.164177	0.815175	0.164497	0.67238	0.240638	0.129001	0.199307	0.715828	0.376433	0.817275	0.784692	0.0831381	0.114507	0.150503	0.160882	0.783433	0.735686	0.465551	0.811357	0.922039	0.654294	0.840404	0.840884	0.738542	0.450028	0.772105	0.218331
61	0.744558	0.767347	0.590935	0.838277	0.898638	0.815607	0.722683	0.143746	0.839084	0.866405	0.427966	0.689076	0.177849	0.910171	0.135589	0.38481	0.708806	0.419196	0.838538	0.477203	0.116411	0.269894	0.131462	0.895928	0.158134	0.790644	0.231309	0.127339	0.22325	0.690216	0.3578	0.696139	0.789523	0.0504774	0.106766	0.178347	0.149638	0.777582	0.78502	0.473574	0.755693	0.916191	0.483356	0.795376	0.845069	0.768654	0.438612	0.778818	0.224138
62	0.750231	0.704909	0.474429	0.832536	0.752451	0.832508	0.628859	0.128473	0.788221	0.903228	0.549766	0.606438	0.141858	0.855397	0.229091	0.276947	0.525303	0.52679	0.851724	0.64909	0.167957	0.247708	0.205455	0.825243	0.251798	0.475626	0.17269	0.1037	0.191235	0.618046	0.326906	0.804498	0.70034	0.0422342	0.128848	0.118897	0.147647	0.806747	0.703049	0.530609	0.805865	0.91314	0.62449	0.838919	0.842739	0.802874	0.490103	0.835437	0.166055
63	0.664567	0.731112	0.444089	0.830465	0.835413	0.81215	0.694177	0.140542	0.85534	0.909575	0.52955	0.66742	0.183741	0.894913	0.173107	0.349332	0.635694	0.451419	0.814815	0.459813	0.127954	0.299785	0.186121	0.814056	0.239886	0.558746	0.248854	0.163243	0.235472	0.699712	0.372994	0.799221	0.778866	0.066802	0.117769	0.154752	0.149231	0.812768	0.695417	0.559099	0.800114	0.931984	0.447104	0.840772	0.861841	0.760044	0.450201	0.676494	0.229107
64	0.724932	0.756092	0.597056	0.797201	0.870088	0.812497	0.66565	0.100466	0.846297	0.893171	0.471607	0.646565	0.176883	0.901782	0.149299	0.368564	0.645772	0.431901	0.855413	0.52011	0.111976	0.239792	0.155787	0.849836	0.14016	0.784501	0.163546	0.103467	0.183667	0.696341	0.331548	0.737336	0.80687	0.0578889	0.102188	0.112433	0.132794	0.812364	0.595605	0.481207	0.777139	0.907958	0.499189	0.804426	0.84323	0.785983	0.447213	0.728146	0.217035
65	0.673101	0.753528	0.605435	0.823441	0.880369	0.765479	0.664073	0.120145	0.844772	0.875724	0.435589	0.665104	0.183493	0.9009	0.118009	0.381219	0.637139	0.466618	0.818085	0.542821	0.105877	0.268055	0.171023	0.847927	0.161624	0.71852	0.190596	0.0994565	0.183408	0.646933	0.304448	0.774142	0.780616	0.0520851	0.093591	0.122706	0.152742	0.738485	0.738946	0.456267	0.749444	0.910732	0.606486	0.807838	0.854124	0.736994	0.442409	0.791389	0.191035
66	0.663304	0.698268	0.501219	0.776428	0.810172	0.826055	0.67119	0.103073	0.821417	0.902159	0.506934	0.642984	0.155412	0.898363	0.208272	0.340233	0.529538	0.543642	0.873628	0.634915	0.135128	0.245916	0.184142	0.829129	0.193004	0.513137	0.187324	0.11517	0.15381	0.634466	0.311965	0.806753	0.740558	0.0435179	0.120599	0.105263	0.122979	0.804703	0.683216	0.622641	0.843498	0.908298	0.711952	0.833226	0.859787	0.768991	0.486835	0.818665	0.20929
67	0.704776	0.727919	0.56484	0.768295	0.849228	0.846963	0.617809	0.125732	0.840354	0.905292	0.491749	0.667361	0.161319	0.901365	0.166108	0.318755	0.574585	0.487271	0.855221	0.452605	0.135249	0.242221	0.178931	0.812841	0.175208	0.536603	0.20114	0.117233	0.209675	0.675124	0.331765	0.752459	0.758786	0.0393092	0.120519	0.126743	0.137414	0.809417	0.539898	0.563202	0.81047	0.915168	0.410413	0.837783	0.851947	0.767036	0.454641	0.777519	0.198379
68	0.645801	0.767815	0.522809	0.832684	0.858411	0.835362	0.703146	0.144468	0.873556	0.884318	0.502473	0.660855	0.205583	0.906572	0.154287	0.361578	0.612874	0.510486	0.863934	0.601114	0.0950969	0.302122	0.145446	0.810446	0.135623	0.585463	0.2283	0.1404	0.182605	0.719334	0.389326	0.835962	0.790418	0.0513982	0.122813	0.153129	0.154904	0.799402	0.750242	0.394015	0.800735	0.916652	0.576434	0.829432	0.862906	0.736534	0.452536	0.826517	0.223524
69	0.774503	0.728228	0.529117	0.875702	0.838032	0.838939	0.643661	0.134504	0.812337	0.897285	0.636502	0.628561	0.173813	0.898481	0.182458	0.336875	0.57562	0.524586	0.855599	0.579882	0.139158	0.277804	0.207461	0.821528	0.223642	0.59386	0.217707	0.139734	0.203615	0.675072	0.351468	0.782794	0.747204	0.0532227	0.128075	0.153277	0.154311	0.824027	0.743189	0.548869	0.826066	0.90017	0.557918	0.866278	0.85743	0.777818	0.446931	0.831809	0.205399
70	0.717037	0.77039	0.604707	0.830705	0.872141	0.835308	0.712713	0.156291	0.872301	0.861936	0.583841	0.701278	0.231281	0.912759	0.145429	0.374933	0.655788	0.44419	0.863792	0.454408	0.122747	0.310192	0.172481	0.86084	0.170958	0.711265	0.241606	0.151828	0.220716	0.709936	0.394666	0.788565	0.778361	0.0727333	0.100855	0.153175	0.161369	0.804752	0.767664	0.484614	0.777205	0.913972	0.52048	0.840928	0.820212	0.709668	0.44338	0.781169	0.246566
71	0.703802	0.730292	0.387998	0.824099	0.767294	0.804855	0.669331	0.113599	0.822455	0.90306	0.555103	0.620859	0.165538	0.884706	0.235713	0.276893	0.519635	0.5187	0.860788	0.614338	0.126051	0.235862	0.199362	0.785327	0.249544	0.549859	0.17784	0.0975963	0.163182	0.646293	0.326458	0.815832	0.750322	0.0406167	0.119705	0.11228	0.123305	0.808087	0.769618	0.613476	0.818188	0.902102	0.565132	0.843134	0.871179	0.79937	0.48017	0.827649	0.190576
72	0.829398	0.73081	0.581998	0.824413	0.870635	0.809712	0.655947	0.151715	0.83468	0.914095	0.537206	0.66173	0.195288	0.887906	0.172783	0.362051	0.673744	0.421433	0.866724	0.47984	0.112569	0.292476	0.183038	0.845836	0.203203	0.694915	0.212556	0.13427	0.218796	0.675237	0.373757	0.77107	0.79608	0.043465	0.116974	0.172295	0.16235	0.815402	0.766639	0.549105	0.77781	0.903463	0.481441	0.847967	0.846581	0.748656	0.418682	0.724047	0.220974
73	0.744172	0.738043	0.622441	0.835422	0.865773	0.833858	0.663683	0.152811	0.846639	0.925523	0.637691	0.645312	0.240204	0.899375	0.188304	0.416434	0.666242	0.488497	0.875182	0.532279	0.128156	0.290703	0.186293	0.881995	0.171213	0.655068	0.224801	0.120216	0.220801	0.691888	0.360009	0.810446	0.754687	0.0291664	0.161493	0.155522	0.155934	0.80072	0.794349	0.569883	0.86603	0.91353	0.458463	0.846168	0.845213	0.741679	0.443761	0.812491	0.175588
74	0.787924	0.750725	0.604003	0.85956	0.848768	0.823436	0.667116	0.147015	0.84759	0.908503	0.521284	0.641411	0.211261	0.908518	0.1668	0.363007	0.618203	0.50281	0.873495	0.491565	0.106632	0.282772	0.14446	0.807696	0.17959	0.568445	0.229366	0.1317	0.189562	0.687091	0.347244	0.814347	0.749023	0.0415845	0.129228	0.143745	0.153286	0.767479	0.842564	0.609194	0.801767	0.894575	0.590692	0.821292	0.841021	0.804939	0.462294	0.847617	0.208511
75	0.789684	0.733163	0.556198	0.8575	0.823445	0.813792	0.697132	0.125972	0.809639	0.886676	0.567137	0.635963	0.189237	0.900604	0.172623	0.298668	0.579104	0.457005	0.842225	0.585114	0.127973	0.269046	0.160601	0.762996	0.170746	0.507324	0.209572	0.126986	0.205357	0.662882	0.357759	0.811406	0.769458	0.0615859	0.12463	0.1317	0.139682	0.811473	0.801884	0.471078	0.812902	0.918684	0.627987	0.807325	0.836005	0.757521	0.453313	0.81724	0.261146
76	0.78581	0.733504	0.531842	0.840253	0.834088	0.859991	0.673798	0.133885	0.840946	0.902445	0.552036	0.649836	0.170842	0.883623	0.178778	0.316827	0.580627	0.517829	0.858236	0.599486	0.0970209	0.266106	0.158538	0.840926	0.199069	0.603552	0.16507	0.110487	0.219569	0.662496	0.339523	0.803164	0.755198	0.0340358	0.123522	0.141447	0.165221	0.800421	0.757608	0.501898	0.776295	0.9075	0.695671	0.839955	0.821681	0.766718	0.466141	0.832405	0.189825
77	0.656889	0.757411	0.630763	0.830123	0.885421	0.822462	0.710813	0.18502	0.853215	0.878614	0.613894	0.719015	0.267147	0.923091	0.13875	0.449491	0.683801	0.497682	0.828783	0.471741	0.113807	0.317371	0.141109	0.872437	0.181801	0.734673	0.28176	0.191824	0.205622	0.725793	0.382592	0.779279	0.802845	0.0682453	0.107266	0.204769	0.21264	0.790227	0.729524	0.495424	0.791106	0.904809	0.41498	0.822576	0.808045	0.706529	0.437325	0.790987	0.24821
78	0.728294	0.739603	0.597597	0.82451	0.85849	0.826507	0.630198	0.132814	0.828944	0.876415	0.527513	0.698052	0.197114	0.900357	0.165923	0.337044	0.611099	0.542918	0.86812	0.590293	0.123381	0.291977	0.146697	0.829491	0.184833	0.535664	0.21271	0.140363	0.174705	0.697369	0.325258	0.816393	0.748451	0.0429574	0.111844	0.140286	0.139265	0.814744	0.798327	0.52366	0.824199	0.903551	0.698143	0.82623	0.859454	0.722071	0.435231	0.859241	0.214427
79	0.794055	0.73454	0.546462	0.849199	0.856079	0.846553	0.671865	0.141258	0.831551	0.895248	0.561349	0.60456	0.182256	0.916101	0.194277	0.326195	0.560644	0.531434	0.865084	0.582668	0.154182	0.281946	0.205756	0.818328	0.208398	0.537934	0.209283	0.148367	0.208047	0.667242	0.336335	0.794261	0.72695	0.0402059	0.107708	0.153255	0.155957	0.81273	0.808441	0.591043	0.807326	0.885718	0.639562	0.85177	0.869423	0.755809	0.46224	0.843165	0.190859
80	0.710445	0.748528	0.593785	0.829873	0.865202	0.809455	0.647902	0.124949	0.838863	0.907411	0.512049	0.661272	0.192915	0.884507	0.169146	0.356013	0.612294	0.4665	0.829441	0.436999	0.12234	0.264351	0.198824	0.879797	0.194581	0.667994	0.221931	0.109316	0.192326	0.688128	0.32595	0.774609	0.763577	0.0444349	0.098989	0.123533	0.145928	0.808523	0.755569	0.500084	0.827108	0.925899	0.475572	0.844841	0.840404	0.769651	0.445122	0.780649	0.18336
81	0.723642	0.734193	0.583057	0.820764	0.860638	0.822096	0.698747	0.130471	0.840023	0.878882	0.521594	0.648646	0.234418	0.884461	0.169694	0.338215	0.615849	0.48044	0.868814	0.616362	0.107692	0.300658	0.17972	0.77712	0.22643	0.540545	0.216212	0.145224	0.188107	0.68894	0.374071	0.852325	0.79184	0.0752156	0.117158	0.1366	0.136998	0.797766	0.73553	0.467805	0.774731	0.918761	0.658518	0.848351	0.841297	0.742011	0.438896	0.839543	0.229458
82	0.803281	0.727225	0.562533	0.856075	0.845143	0.825655	0.646238	0.142563	0.834984	0.870026	0.542341	0.64966	0.184047	0.892246	0.196348	0.330267	0.599956	0.527559	0.888889	0.581851	0.143416	0.285895	0.180313	0.835074	0.187276	0.496616	0.207505	0.15758	0.197007	0.684344	0.349564	0.798463	0.753737	0.0356006	0.134335	0.154348	0.156812	0.802598	0.706398	0.508141	0.823965	0.91317	0.57965	0.826868	0.854574	0.751368	0.450326	0.823927	0.190184
83	0.764566	0.73741	0.508962	0.868391	0.853616	0.852939	0.649442	0.15647	0.804807	0.898602	0.598522	0.622908	0.222995	0.907983	0.142685	0.361125	0.58123	0.486838	0.859596	0.564103	0.144907	0.293168	0.211798	0.783577	0.188582	0.523616	0.216419	0.142551	0.182175	0.675273	0.359059	0.807267	0.73658	0.0516719	0.121141	0.155071	0.16453	0.824209	0.755384	0.478433	0.830174	0.912669	0.681186	0.827471	0.843071	0.768597	0.456466	0.820957	0.200278
84	0.732253	0.739489	0.58853	0.836331	0.859919	0.824653	0.701416	0.132326	0.843949	0.869023	0.467305	0.69903	0.192301	0.89327	0.170848	0.332516	0.589469	0.47859	0.865412	0.542786	0.138476	0.289309	0.147747	0.779095	0.189972	0.596381	0.230209	0.127789	0.193407	0.695792	0.393742	0.800642	0.772162	0.0669446	0.110083	0.145101	0.144408	0.788146	0.718787	0.425578	0.776742	0.930388	0.674221	0.813439	0.833176	0.750342	0.467781	0.826309	0.237467
85	0.793892	0.718313	0.630945	0.86084	0.857587	0.848095	0.704194	0.1468	0.850844	0.872411	0.520544	0.665129	0.18525	0.899487	0.155262	0.330053	0.604955	0.477046	0.881046	0.502425	0.135822	0.283545	0.173118	0.800776	0.203516	0.543709	0.201675	0.138224	0.172057	0.677006	0.36239	0.801528	0.752473	0.0572143	0.126734	0.151906	0.153555	0.810745	0.768476	0.473566	0.809596	0.907446	0.647003	0.827894	0.855159	0.737662	0.439326	0.844064	0.213251
86	0.828008	0.675338	0.455742	0.855711	0.768629	0.817658	0.666396	0.162848	0.800227	0.876686	0.538286	0.614975	0.222656	0.898145	0.210065	0.286469	0.503707	0.464879	0.826367	0.59124	0.173596	0.29158	0.207992	0.81913	0.266576	0.502136	0.233941	0.13754	0.195141	0.633646	0.354808	0.784956	0.72925	0.043115	0.13899	0.155465	0.173963	0.803247	0.819786	0.599591	0.830173	0.883009	0.651813	0.850341	0.863626	0.735131	0.499306	0.791707	0.211577
87	0.827189	0.717477	0.612846	0.851283	0.8546	0.840835	0.700927	0.143461	0.835147	0.904278	0.518062	0.692784	0.181724	0.887799	0.165108	0.336059	0.631246	0.530999	0.848376	0.572314	0.110453	0.24758	0.152105	0.845439	0.195185	0.632485	0.212957	0.104749	0.20473	0.644353	0.329986	0.797321	0.729978	0.0394439	0.113331	0.146251	0.147674	0.817893	0.805464	0.525927	0.781783	0.902155	0.691798	0.863127	0.852927	0.762575	0.436812	0.859681	0.216672
88	0.658126	0.732671	0.426259	0.814654	0.794846	0.842556	0.661276	0.0945934	0.829322	0.912487	0.502683	0.617429	0.149384	0.889084	0.232305	0.281884	0.578203	0.543028	0.846343	0.645905	0.11298	0.220911	0.187421	0.825026	0.239586	0.549259	0.165881	0.0956677	0.183536	0.649258	0.296944	0.820378	0.748107	0.038437	0.0969699	0.105162	0.124723	0.816324	0.788607	0.464685	0.843754	0.908669	0.6317	0.823314	0.875148	0.764355	0.462535	0.862943	0.181776
89	0.808383	0.704578	0.451043	0.832288	0.749565	0.808611	0.744395	0.140148	0.79097	0.883386	0.431689	0.597758	0.171882	0.865331	0.227513	0.257946	0.563977	0.462763	0.852103	0.543118	0.161952	0.272525	0.188072	0.835128	0.298057	0.474429	0.205631	0.130945	0.189401	0.626388	0.351538	0.762678	0.748595	0.0262182	0.163339	0.138963	0.166695	0.827846	0.837994	0.532443	0.764792	0.894272	0.612127	0.812984	0.874158	0.720765	0.486112	0.818494	0.197418
90	0.757057	0.731357	0.562369	0.849758	0.838191	0.847842	0.710856	0.161485	0.834217	0.895363	0.597386	0.658515	0.196234	0.897007	0.164185	0.328581	0.549398	0.569643	0.853093	0.560829	0.151498	0.294663	0.15801	0.779779	0.190792	0.547406	0.229256	0.142927	0.208149	0.670325	0.368214	0.82826	0.760647	0.0811749	0.0955352	0.164134	0.169212	0.795484	0.758469	0.561003	0.829225	0.903023	0.684768	0.840254	0.856601	0.747214	0.467553	0.841919	0.232815
91	0.631122	0.725996	0.663512	0.811006	0.880641	0.788892	0.73982	0.135504	0.872868	0.871849	0.419263	0.67523	0.191696	0.923778	0.147883	0.358525	0.662186	0.44713	0.853827	0.465203	0.10994	0.271939	0.157763	0.839253	0.185854	0.625599	0.205598	0.123033	0.192566	0.70844	0.386627	0.775048	0.825809	0.0635655	0.102806	0.13517	0.154067	0.779344	0.710137	0.438485	0.783366	0.919225	0.54306	0.791586	0.844545	0.752233	0.464365	0.78743	0.207644
92	0.701998	0.751324	0.636961	0.810857	0.872512	0.815492	0.742946	0.140377	0.86844	0.865081	0.529215	0.682176	0.203954	0.902465	0.17789	0.371001	0.684087	0.488544	0.867409	0.475738	0.103894	0.28322	0.16755	0.874909	0.180994	0.738817	0.229237	0.13551	0.205081	0.695889	0.377111	0.795119	0.790426	0.0741744	0.0913785	0.142527	0.167838	0.791458	0.717837	0.479746	0.738767	0.920635	0.543031	0.815743	0.837718	0.748318	0.43574	0.803882	0.24444
93	0.689266	0.757404	0.574207	0.825647	0.865496	0.835955	0.665645	0.130556	0.83424	0.894475	0.487487	0.665275	0.187877	0.894654	0.177163	0.346611	0.611591	0.470998	0.870043	0.446774	0.107298	0.251065	0.184761	0.908216	0.17367	0.708641	0.192825	0.123559	0.207099	0.668049	0.337121	0.763983	0.720679	0.0472907	0.113649	0.126086	0.153352	0.79663	0.748097	0.490022	0.824692	0.900729	0.389646	0.846633	0.858255	0.744355	0.447227	0.763966	0.195336
94	0.749968	0.755081	0.596809	0.856249	0.86904	0.826046	0.666557	0.161902	0.850744	0.872524	0.576806	0.676508	0.197864	0.906125	0.146336	0.398759	0.578867	0.487943	0.826056	0.548199	0.101947	0.309519	0.178272	0.773094	0.15465	0.612342	0.236602	0.147501	0.183465	0.72223	0.403132	0.821569	0.769553	0.0708345	0.126808	0.163806	0.185578	0.79457	0.780014	0.493446	0.818664	0.924125	0.67152	0.841645	0.848035	0.737855	0.466192	0.822557	0.24492
95	0.639516	0.739442	0.499671	0.758906	0.813291	0.803892	0.659811	0.0970877	0.822763	0.853121	0.465254	0.637484	0.16971	0.871946	0.160801	0.343508	0.640373	0.525912	0.870533	0.568707	0.127086	0.253894	0.151618	0.8236	0.186951	0.65914	0.192579	0.096503	0.174457	0.681688	0.33502	0.823972	0.781891	0.0640293	0.113338	0.113668	0.137031	0.802642	0.745264	0.434622	0.771526	0.918457	0.714755	0.795814	0.819265	0.688631	0.44006	0.852134	0.215346
96	0.690606	0.742784	0.546539	0.843889	0.816698	0.81462	0.744056	0.142133	0.868736	0.889533	0.530336	0.682652	0.203872	0.902179	0.196335	0.316406	0.621153	0.527596	0.864111	0.535013	0.11577	0.278964	0.170628	0.883498	0.205735	0.672488	0.210527	0.132285	0.186696	0.692342	0.360847	0.816046	0.789421	0.0613182	0.117523	0.129542	0.158494	0.768763	0.725499	0.45305	0.755429	0.915389	0.585791	0.809157	0.832393	0.734382	0.439182	0.849486	0.227843
97	0.74626	0.736513	0.57968	0.829597	0.847181	0.816467	0.687358	0.132825	0.826541	0.914351	0.492776	0.678163	0.192278	0.888969	0.155006	0.32901	0.620785	0.504313	0.85783	0.624787	0.115977	0.289459	0.186216	0.848397	0.199235	0.591404	0.250077	0.132595	0.195251	0.690465	0.345732	0.821574	0.766792	0.0406814	0.10471	0.147451	0.156879	0.820696	0.791917	0.56182	0.81417	0.901911	0.683543	0.819479	0.826068	0.752797	0.451292	0.843985	0.204088
98	0.759205	0.747454	0.568548	0.86039	0.853398	0.830428	0.711034	0.183836	0.827922	0.884794	0.545383	0.621626	0.242853	0.922278	0.143653	0.337596	0.599814	0.478636	0.895189	0.538071	0.147466	0.330621	0.196963	0.793123	0.17628	0.635305	0.253978	0.174317	0.211972	0.668902	0.380057	0.795103	0.742478	0.121688	0.147654	0.160603	0.170896	0.789705	0.711854	0.464184	0.801533	0.907407	0.622355	0.832705	0.834989	0.753453	0.455649	0.82894	0.251362
99	0.758666	0.765031	0.566352	0.838557	0.876496	0.817894	0.699862	0.14776	0.831003	0.905223	0.56024	0.672988	0.208075	0.896545	0.146609	0.353263	0.65511	0.515661	0.828965	0.642706	0.105093	0.297664	0.171749	0.857272	0.14918	0.501087	0.224457	0.121722	0.2004	0.702474	0.367403	0.81771	0.77331	0.0453796	0.0987991	0.152696	0.16854	0.815745	0.775275	0.498969	0.791532	0.904255	0.668589	0.836118	0.83174	0.738756	0.423992	0.827722	0.205492
100	0.723938	0.736874	0.409633	0.832229	0.75989	0.842324	0.633604	0.109715	0.792692	0.882913	0.650489	0.602076	0.133667	0.87171	0.245316	0.298697	0.518941	0.52291	0.879725	0.543161	0.140181	0.252011	0.220279	0.815086	0.230751	0.451157	0.166303	0.0975137	0.161898	0.642672	0.312801	0.830763	0.736185	0.0359122	0.125072	0.111993	0.124337	0.843908	0.798516	0.561499	0.844087	0.896605	0.658785	0.849675	0.881148	0.783254	0.475988	0.858544	0.180161
101	0.767663	0.737103	0.542588	0.83251	0.870519	0.823078	0.660158	0.134369	0.842582	0.908538	0.560628	0.652679	0.181955	0.896773	0.150484	0.353519	0.576668	0.526187	0.849549	0.625335	0.134164	0.267036	0.171344	0.848366	0.201504	0.598022	0.223373	0.127665	0.195607	0.671755	0.352699	0.831146	0.738996	0.0385237	0.0953828	0.146134	0.157381	0.809535	0.812517	0.511077	0.831547	0.899081	0.656605	0.835615	0.856162	0.789605	0.426479	0.823653	0.194297
102	0.71118	0.72277	0.514684	0.844124	0.778354	0.82557	0.71515	0.154383	0.85711	0.915675	0.591188	0.610718	0.201997	0.909019	0.219733	0.326498	0.538809	0.499989	0.87359	0.471701	0.143568	0.283165	0.192238	0.802054	0.246883	0.518105	0.22519	0.142316	0.201715	0.651213	0.362912	0.81146	0.755867	0.0824775	0.134827	0.148982	0.165496	0.803954	0.727485	0.573808	0.848459	0.913707	0.495292	0.82733	0.851038	0.760496	0.473666	0.65748	0.230183
103	0.741997	0.712465	0.553916	0.799938	0.803225	0.80702	0.654367	0.114066	0.834583	0.855506	0.467385	0.662771	0.16739	0.89624	0.215915	0.302995	0.586522	0.422241	0.875663	0.442433	0.141163	0.245995	0.182558	0.811278	0.234591	0.58952	0.158231	0.085752	0.217079	0.623848	0.324677	0.770472	0.713327	0.0325842	0.144391	0.10321	0.117257	0.802446	0.75607	0.535913	0.732913	0.898618	0.549446	0.822981	0.853134	0.719562	0.438575	0.82116	0.218744
104	0.692614	0.736811	0.604498	0.823526	0.900714	0.818327	0.729074	0.143912	0.868954	0.899918	0.54528	0.639226	0.180011	0.908339	0.157375	0.336233	0.642704	0.484063	0.871708	0.611299	0.131656	0.280854	0.185656	0.875141	0.188276	0.746874	0.217794	0.14639	0.214314	0.668423	0.351807	0.82122	0.77454	0.0892923	0.101302	0.155611	0.160019	0.759055	0.660923	0.493258	0.770224	0.916661	0.64973	0.828849	0.847612	0.761027	0.416313	0.845622	0.182811
105	0.805446	0.736618	0.538548	0.869402	0.850632	0.8519	0.707434	0.156148	0.813169	0.912741	0.653344	0.625743	0.192256	0.894584	0.165814	0.364409	0.586729	0.527349	0.849326	0.590321	0.165781	0.29659	0.215934	0.84932	0.206569	0.522858	0.206303	0.155502	0.227175	0.696815	0.362835	0.844333	0.724421	0.0446915	0.153917	0.149627	0.169147	0.804117	0.832657	0.516922	0.806368	0.908829	0.651304	0.836156	0.845254	0.750207	0.448635	0.854228	0.210872
106	0.703741	0.744368	0.648179	0.824293	0.851219	0.845846	0.720209	0.138432	0.863514	0.877584	0.54201	0.644604	0.208682	0.922296	0.151628	0.365674	0.610931	0.46043	0.842985	0.479105	0.131479	0.273586	0.192429	0.874394	0.190578	0.607477	0.238652	0.140101	0.174081	0.685201	0.365433	0.778738	0.750869	0.0686219	0.11522	0.157907	0.150424	0.796859	0.620381	0.547503	0.805196	0.909587	0.594998	0.854482	0.852476	0.749844	0.460597	0.783374	0.217307
107	0.663397	0.760008	0.671498	0.794388	0.862736	0.814933	0.725812	0.157234	0.846425	0.861702	0.55961	0.718646	0.213771	0.920162	0.147936	0.386659	0.647168	0.484582	0.849369	0.529198	0.121744	0.308195	0.152292	0.876653	0.177125	0.779159	0.241351	0.160392	0.209307	0.700122	0.387745	0.772231	0.805987	0.127145	0.0885486	0.164994	0.178598	0.771379	0.60351	0.497064	0.840455	0.913306	0.570559	0.803528	0.817486	0.746797	0.430281	0.770324	0.239168
108	0.754125	0.742547	0.53435	0.852262	0.856381	0.830939	0.713208	0.147205	0.855976	0.890323	0.462937	0.704068	0.210719	0.918839	0.15161	0.346772	0.58619	0.473932	0.839895	0.557907	0.105694	0.297222	0.163936	0.786362	0.17081	0.618561	0.229368	0.131455	0.199475	0.707427	0.391453	0.771257	0.763787	0.045098	0.115837	0.141142	0.145457	0.789776	0.715157	0.465715	0.784862	0.912218	0.657252	0.811922	0.85897	0.754558	0.479715	0.829007	0.200439
109	0.799835	0.726047	0.560962	0.872535	0.889922	0.83102	0.624647	0.141664	0.82325	0.911936	0.559716	0.608265	0.202557	0.901108	0.124028	0.355117	0.597173	0.48679	0.861334	0.638355	0.11746	0.294893	0.162805	0.817445	0.138254	0.580226	0.228364	0.139469	0.178207	0.705401	0.347932	0.831671	0.732577	0.0291487	0.122303	0.14099	0.147082	0.803057	0.7473	0.456886	0.842169	0.907732	0.707427	0.850892	0.846809	0.771504	0.455232	0.809234	0.226365
110	0.701781	0.743449	0.539311	0.834573	0.864382	0.844105	0.684248	0.13918	0.839441	0.887258	0.51658	0.639584	0.205371	0.901771	0.167998	0.341789	0.618942	0.471616	0.84986	0.4991	0.135939	0.3101	0.177595	0.833237	0.207189	0.521633	0.220899	0.138325	0.205245	0.675592	0.349225	0.800436	0.751609	0.0612893	0.0953674	0.142929	0.168745	0.797822	0.781987	0.438729	0.806414	0.91421	0.710509	0.837634	0.851391	0.717846	0.446086	0.813024	0.211713
111	0.719583	0.74611	0.617955	0.831642	0.852312	0.834872	0.759869	0.145168	0.872792	0.865741	0.521354	0.694041	0.205289	0.92115	0.171712	0.343581	0.636364	0.451147	0.852083	0.48022	0.110494	0.288855	0.161838	0.855896	0.174074	0.662372	0.234422	0.143255	0.217252	0.70549	0.361238	0.780798	0.766434	0.0688881	0.111204	0.157247	0.159134	0.798672	0.616923	0.488966	0.770191	0.913261	0.52315	0.812509	0.849528	0.730329	0.435509	0.77436	0.211414
112	0.81254	0.70775	0.46456	0.852334	0.76907	0.804578	0.68439	0.155209	0.815032	0.905491	0.49638	0.652693	0.173993	0.876001	0.226756	0.320042	0.55714	0.537905	0.844671	0.634037	0.165325	0.310921	0.229607	0.809534	0.268402	0.467575	0.214364	0.129017	0.213471	0.636735	0.360079	0.809716	0.723316	0.0352078	0.142036	0.163294	0.161769	0.804443	0.794706	0.599835	0.810576	0.894063	0.645873	0.825947	0.85679	0.743882	0.492541	0.831443	0.200945
113	0.693043	0.770508	0.589238	0.81183	0.88655	0.803002	0.670035	0.118167	0.82321	0.880683	0.468645	0.692063	0.161744	0.904282	0.133494	0.406526	0.630306	0.439663	0.817855	0.500099	0.105877	0.258495	0.157255	0.85124	0.150482	0.739589	0.210943	0.117472	0.15689	0.702659	0.340365	0.754063	0.765916	0.05324	0.0979093	0.132182	0.184105	0.817672	0.717055	0.408669	0.822634	0.905408	0.626581	0.827243	0.843995	0.722148	0.45956	0.784259	0.182885
114	0.638664	0.7587	0.64521	0.834088	0.896841	0.838589	0.706507	0.147871	0.861151	0.863028	0.538458	0.693534	0.23562	0.92465	0.145374	0.41117	0.660352	0.472671	0.833105	0.513377	0.103526	0.314282	0.147457	0.872274	0.156341	0.734813	0.261123	0.165641	0.22126	0.711321	0.38302	0.807642	0.811209	0.0778624	0.0865828	0.166992	0.161626	0.768761	0.734014	0.414002	0.814177	0.92109	0.58315	0.8129	0.815622	0.735895	0.441856	0.759891	0.226423
115	0.744574	0.750823	0.596019	0.850252	0.867012	0.857401	0.672257	0.179221	0.828425	0.889826	0.619612	0.636345	0.252314	0.897259	0.177511	0.365813	0.565652	0.489219	0.877738	0.543516	0.136554	0.33507	0.177272	0.813315	0.203408	0.534024	0.271431	0.136887	0.230726	0.675749	0.412759	0.81938	0.748469	0.0796545	0.126501	0.18513	0.175543	0.816262	0.771697	0.502029	0.839348	0.921067	0.489531	0.846811	0.861779	0.752748	0.44107	0.775555	0.222087
116	0.790083	0.706577	0.441163	0.845255	0.74915	0.786636	0.702331	0.122951	0.798976	0.867215	0.394038	0.593031	0.160417	0.880146	0.205872	0.2797	0.544996	0.444152	0.86152	0.596407	0.15939	0.258994	0.186008	0.814941	0.275085	0.495776	0.190417	0.1206	0.220899	0.639621	0.347847	0.814248	0.741616	0.040707	0.132035	0.131288	0.147965	0.83102	0.842799	0.546169	0.782318	0.907692	0.634021	0.822829	0.851295	0.768919	0.490761	0.825168	0.192611
117	0.724651	0.744894	0.608115	0.850224	0.851535	0.844799	0.685287	0.165311	0.831052	0.876916	0.569054	0.637097	0.272927	0.902987	0.150867	0.326101	0.598024	0.49672	0.849083	0.583274	0.142845	0.325782	0.175333	0.801236	0.210097	0.520919	0.258222	0.14922	0.227456	0.688497	0.384019	0.788199	0.7579	0.0723999	0.129138	0.1726	0.170609	0.795126	0.807904	0.49834	0.817085	0.92158	0.615031	0.83274	0.843575	0.732052	0.436588	0.789168	0.199317
118	0.723881	0.731928	0.599225	0.877428	0.848197	0.834058	0.720893	0.149655	0.843314	0.885296	0.523454	0.68387	0.200443	0.893457	0.151279	0.372164	0.62392	0.439246	0.81318	0.55919	0.117991	0.297973	0.160907	0.79326	0.182656	0.554404	0.236727	0.175218	0.206566	0.713546	0.372452	0.791785	0.774632	0.0539083	0.124422	0.15496	0.15858	0.779493	0.740445	0.471992	0.790262	0.908264	0.684626	0.829137	0.834296	0.75798	0.461206	0.85081	0.209104
119	0.720018	0.732951	0.622402	0.866809	0.863909	0.822802	0.665854	0.155038	0.860396	0.858024	0.584439	0.694949	0.244386	0.896974	0.158109	0.37564	0.640174	0.480333	0.860355	0.481586	0.149862	0.297155	0.155053	0.844557	0.218504	0.582986	0.237535	0.155768	0.253185	0.67829	0.369233	0.788353	0.74685	0.0604293	0.0917906	0.170384	0.159525	0.773	0.801879	0.48172	0.782554	0.914833	0.621352	0.843432	0.852545	0.757183	0.45192	0.844113	0.224716
120	0.669153	0.730542	0.613865	0.825077	0.8305	0.815729	0.643084	0.153328	0.846329	0.873136	0.510585	0.690867	0.195079	0.893554	0.186333	0.365564	0.693199	0.475362	0.855516	0.506893	0.110867	0.261474	0.135096	0.861536	0.180873	0.605159	0.210873	0.11814	0.185231	0.677222	0.352856	0.778762	0.762715	0.0850417	0.0995408	0.15019	0.140202	0.822006	0.74405	0.515342	0.803719	0.927628	0.575136	0.8148	0.861065	0.721347	0.440824	0.820167	0.226852
121	0.674309	0.75333	0.636718	0.827828	0.885246	0.830511	0.697169	0.177603	0.858368	0.878922	0.512159	0.691968	0.201748	0.912728	0.114739	0.334298	0.678443	0.437991	0.84682	0.517895	0.112324	0.297003	0.175639	0.841309	0.197417	0.743816	0.22503	0.152266	0.206626	0.711324	0.376666	0.761628	0.77148	0.0909579	0.0935891	0.15785	0.18501	0.791585	0.634842	0.460328	0.802808	0.91542	0.551124	0.825303	0.856872	0.724791	0.457482	0.791442	0.225287
122	0.796514	0.758278	0.621029	0.83605	0.869758	0.84032	0.66775	0.128617	0.845592	0.903716	0.565843	0.639531	0.17284	0.908844	0.163915	0.365069	0.613521	0.527859	0.862663	0.573645	0.109622	0.2699	0.173075	0.821042	0.174698	0.556653	0.190722	0.13385	0.173931	0.706869	0.312563	0.766902	0.736417	0.0354481	0.120381	0.122241	0.129858	0.818842	0.814296	0.527379	0.812722	0.902746	0.676469	0.843177	0.860663	0.751162	0.447871	0.849638	0.195017
123	0.746766	0.708182	0.526205	0.807978	0.843236	0.82037	0.701125	0.116949	0.810394	0.895015	0.426933	0.639997	0.143149	0.880591	0.182782	0.294103	0.56196	0.491633	0.84723	0.522558	0.162688	0.249486	0.189076	0.825158	0.224443	0.464163	0.18695	0.104801	0.167972	0.631634	0.310618	0.784572	0.740863	0.0550859	0.130101	0.115988	0.140475	0.803446	0.713061	0.414302	0.779087	0.89986	0.677522	0.820871	0.853012	0.733008	0.4552	0.807266	0.192577
124	0.699849	0.730531	0.594744	0.849459	0.835733	0.820492	0.725143	0.140345	0.862041	0.888168	0.557251	0.64701	0.184221	0.905991	0.190297	0.344029	0.629612	0.498591	0.853783	0.664856	0.147648	0.264086	0.164419	0.766842	0.180464	0.50895	0.210535	0.112179	0.198702	0.703499	0.363075	0.831267	0.780169	0.0707975	0.118908	0.148475	0.145221	0.774799	0.737929	0.445442	0.805814	0.91106	0.584441	0.824922	0.858871	0.730029	0.455608	0.839351	0.206523
125	0.748973	0.724248	0.51093	0.835469	0.855994	0.854804	0.67527	0.117532	0.861956	0.915278	0.539599	0.628843	0.168734	0.882365	0.161878	0.334763	0.624182	0.470876	0.860507	0.578267	0.1358	0.244558	0.183377	0.829066	0.163692	0.63576	0.194992	0.126159	0.173538	0.692478	0.335426	0.825059	0.752518	0.0458611	0.118256	0.117802	0.127505	0.818155	0.817142	0.557054	0.80553	0.911219	0.578546	0.834602	0.848921	0.739991	0.460215	0.847667	0.173036
126	0.819848	0.721206	0.556462	0.834265	0.81906	0.821326	0.673868	0.136052	0.843332	0.922859	0.517799	0.649654	0.137598	0.887112	0.190106	0.277072	0.565093	0.47835	0.845672	0.563063	0.158654	0.274296	0.206641	0.860705	0.220662	0.507649	0.221564	0.115291	0.208225	0.650989	0.32638	0.819772	0.714159	0.0443024	0.121504	0.148463	0.1338	0.81048	0.801883	0.639851	0.881788	0.886517	0.676755	0.812176	0.860065	0.749987	0.448691	0.818146	0.205627
127	0.697317	0.773911	0.692673	0.865013	0.896986	0.854949	0.731175	0.148463	0.845756	0.920773	0.425042	0.755993	0.176211	0.914122	0.293991	0.357303	0.700159	0.396417	0.76665	0.400863	0.125784	0.302924	0.143818	0.899992	0.189282	0.609584	0.178233	0.124669	0.275759	0.711362	0.383923	0.765963	0.768464	0.0515331	0.127752	0.160777	0.146505	0.828144	0.636336	0.535326	0.486489	0.912547	0.542252	0.69628	0.890232	0.676482	0.448491	0.834745	0.2377
128	0.774142	0.737575	0.58275	0.86282	0.85543	0.820091	0.636581	0.15801	0.828309	0.882798	0.39796	0.677678	0.201947	0.894139	0.150224	0.357247	0.624287	0.475801	0.810524	0.565656	0.120874	0.288952	0.161026	0.842492	0.150053	0.681504	0.209837	0.118994	0.244478	0.668434	0.350751	0.76707	0.74471	0.044093	0.116814	0.152052	0.13971	0.790494	0.659948	0.519573	0.767781	0.895219	0.490131	0.805005	0.844294	0.736713	0.512138	0.804952	0.199507
129	0.689373	0.710525	0.50149	0.790129	0.817603	0.840398	0.61765	0.118512	0.813367	0.916462	0.638474	0.633363	0.178092	0.870389	0.211172	0.308908	0.542575	0.502252	0.865312	0.532392	0.161564	0.266608	0.233099	0.777346	0.231293	0.487377	0.167593	0.128696	0.17136	0.631681	0.338057	0.7876	0.72537	0.0426248	0.167443	0.118094	0.130079	0.809407	0.681531	0.609626	0.774716	0.900944	0.66264	0.852869	0.838071	0.759154	0.464895	0.814396	0.224146
130	0.728518	0.752073	0.638912	0.841262	0.89793	0.818267	0.739343	0.17061	0.823359	0.85993	0.560223	0.705854	0.204445	0.889378	0.115413	0.439496	0.709312	0.547753	0.854434	0.441073	0.105302	0.308628	0.166774	0.83572	0.162149	0.777098	0.216678	0.138016	0.21001	0.697563	0.356305	0.786024	0.813964	0.042082	0.0917323	0.173407	0.161312	0.793252	0.781473	0.476348	0.788184	0.919427	0.501073	0.817681	0.847517	0.73788	0.426134	0.818769	0.202088
131	0.787795	0.710999	0.364714	0.852387	0.696696	0.829861	0.644817	0.134476	0.796728	0.894133	0.505371	0.600791	0.176649	0.863216	0.207019	0.297033	0.478177	0.466304	0.857452	0.556629	0.153168	0.27707	0.203532	0.797634	0.267519	0.441997	0.202432	0.118351	0.198031	0.604956	0.358991	0.78133	0.705759	0.0441147	0.151694	0.132308	0.151546	0.808215	0.725545	0.591185	0.788617	0.898523	0.583489	0.846425	0.852156	0.763966	0.484086	0.807064	0.21076
132	0.687999	0.737963	0.614009	0.834106	0.845495	0.812781	0.699423	0.147735	0.852504	0.87085	0.631214	0.653127	0.225809	0.888117	0.167352	0.362005	0.612947	0.45461	0.869472	0.490598	0.125466	0.281949	0.158754	0.857055	0.200715	0.601295	0.23508	0.165782	0.185612	0.678468	0.377484	0.81967	0.751096	0.0967902	0.113823	0.143505	0.167077	0.807204	0.689857	0.530037	0.8353	0.920872	0.506425	0.822903	0.858109	0.751219	0.438014	0.762906	0.234189
133	0.737658	0.734777	0.615928	0.845852	0.878018	0.832246	0.711051	0.196578	0.860938	0.876443	0.519067	0.72751	0.243088	0.913228	0.133781	0.424087	0.66051	0.505371	0.84678	0.498465	0.104561	0.336527	0.140663	0.872029	0.14367	0.645168	0.272805	0.209223	0.230312	0.721554	0.391237	0.781814	0.829821	0.0866295	0.087979	0.176688	0.181122	0.783247	0.719849	0.38329	0.796184	0.925989	0.609445	0.846007	0.836482	0.723968	0.449946	0.797018	0.265109
134	0.744251	0.752044	0.609177	0.841714	0.867138	0.825985	0.656799	0.12735	0.810986	0.897068	0.497737	0.682673	0.18107	0.898629	0.175548	0.369838	0.623941	0.498892	0.848307	0.436582	0.0886209	0.249307	0.17594	0.838841	0.167823	0.730885	0.191784	0.112243	0.203222	0.680197	0.31927	0.795618	0.76277	0.0511603	0.115587	0.109468	0.169759	0.811951	0.749693	0.532817	0.794622	0.912863	0.506096	0.854233	0.879237	0.731111	0.440328	0.757057	0.222044
135	0.777048	0.745871	0.630212	0.835742	0.852318	0.819455	0.657291	0.159976	0.834218	0.902036	0.502042	0.681139	0.177815	0.902596	0.136477	0.340903	0.625298	0.510949	0.858609	0.513031	0.128522	0.279357	0.154598	0.852032	0.165311	0.739619	0.217119	0.115404	0.21554	0.689955	0.351494	0.755712	0.78944	0.0432853	0.110028	0.15719	0.152135	0.812923	0.781255	0.545953	0.822733	0.901137	0.584487	0.835445	0.856419	0.751499	0.439847	0.778377	0.187291
136	0.770052	0.707292	0.601336	0.847662	0.875602	0.844521	0.649932	0.131676	0.862	0.902667	0.553958	0.641133	0.16389	0.897009	0.146483	0.372114	0.640788	0.513785	0.874555	0.611373	0.0984668	0.270191	0.164871	0.734028	0.177044	0.538925	0.19372	0.136936	0.202168	0.674628	0.332706	0.827392	0.756147	0.0451465	0.108955	0.132472	0.148601	0.809186	0.769681	0.494864	0.83183	0.912316	0.718905	0.861877	0.842538	0.753706	0.447054	0.83608	0.189316
137	0.653303	0.726373	0.501584	0.795709	0.778355	0.821305	0.684822	0.114998	0.809741	0.894287	0.534124	0.591418	0.167985	0.863065	0.189283	0.319626	0.566261	0.550364	0.864201	0.590088	0.129917	0.233613	0.200321	0.805397	0.245483	0.516305	0.179082	0.0925838	0.172964	0.649898	0.33379	0.830205	0.756996	0.0451617	0.139114	0.11286	0.112053	0.809132	0.736076	0.536226	0.806607	0.892108	0.680653	0.804862	0.841038	0.752006	0.44968	0.83666	0.193569
138	0.775788	0.720975	0.568522	0.807189	0.859398	0.793134	0.680805	0.124627	0.845717	0.858046	0.435601	0.628713	0.193305	0.908329	0.151579	0.323139	0.595999	0.498385	0.872806	0.492181	0.141755	0.263816	0.167207	0.872218	0.209191	0.634256	0.196187	0.129784	0.256216	0.693586	0.324873	0.788921	0.752818	0.047503	0.130684	0.147132	0.137629	0.798111	0.792789	0.532394	0.801902	0.907221	0.602595	0.822418	0.803124	0.747668	0.434404	0.82062	0.199427
139	0.794953	0.697775	0.438255	0.852362	0.716897	0.813622	0.663859	0.119326	0.812231	0.882398	0.5541	0.619268	0.180074	0.867711	0.222151	0.295596	0.516601	0.53134	0.855185	0.571315	0.133974	0.247142	0.164094	0.816203	0.274231	0.476428	0.195291	0.112019	0.196871	0.67369	0.333588	0.818492	0.73477	0.0307754	0.124734	0.126253	0.143419	0.805354	0.792922	0.615424	0.823344	0.903305	0.59253	0.836826	0.865625	0.755627	0.498174	0.860021	0.19072
140	0.755717	0.724885	0.598274	0.843332	0.852433	0.822052	0.668526	0.153051	0.824235	0.909517	0.516717	0.680412	0.198844	0.889836	0.168483	0.370222	0.553348	0.474872	0.832805	0.473968	0.140201	0.277563	0.171838	0.868176	0.197352	0.542805	0.211333	0.146856	0.229626	0.67027	0.36653	0.764863	0.727011	0.0323669	0.123491	0.154645	0.156583	0.786663	0.729447	0.560203	0.819776	0.895398	0.393264	0.833256	0.853657	0.742583	0.45797	0.702985	0.194159
141	0.715996	0.721547	0.437279	0.814228	0.744211	0.811562	0.664679	0.109403	0.792848	0.880981	0.538436	0.596375	0.160123	0.86729	0.246278	0.289477	0.505015	0.513218	0.872078	0.613421	0.125931	0.24772	0.194517	0.82203	0.260396	0.480151	0.163898	0.104851	0.153169	0.614965	0.299449	0.819556	0.702307	0.0464146	0.130956	0.119257	0.134265	0.806515	0.729695	0.545917	0.821317	0.911294	0.667264	0.841871	0.843174	0.751013	0.469787	0.854376	0.191168
142	0.751549	0.723399	0.487329	0.820754	0.796379	0.820563	0.610634	0.108925	0.807057	0.865302	0.512612	0.573095	0.162017	0.865485	0.216017	0.268926	0.512003	0.414592	0.866129	0.555408	0.119542	0.253629	0.190666	0.792608	0.209169	0.530579	0.18924	0.107076	0.181224	0.632324	0.329578	0.815361	0.728373	0.0459737	0.136864	0.113288	0.140946	0.816932	0.75386	0.563007	0.810905	0.901706	0.643736	0.832991	0.823467	0.761463	0.492942	0.851507	0.175934
143	0.754356	0.731447	0.489008	0.830632	0.806636	0.799231	0.647743	0.123564	0.821817	0.903093	0.560021	0.638497	0.148084	0.89423	0.212096	0.318485	0.532011	0.475433	0.849208	0.491616	0.16121	0.243198	0.183865	0.837763	0.239945	0.471054	0.175058	0.113458	0.210217	0.616331	0.342651	0.769644	0.707753	0.0398654	0.115511	0.118071	0.133667	0.809415	0.686461	0.562033	0.837934	0.904101	0.508547	0.846734	0.850999	0.762436	0.479523	0.768631	0.216351
144	0.6879	0.749482	0.642079	0.825122	0.854088	0.817804	0.654858	0.128038	0.839211	0.896905	0.549819	0.678392	0.184492	0.903002	0.155671	0.340223	0.588577	0.47315	0.861162	0.506886	0.128696	0.249714	0.182597	0.827223	0.138778	0.651258	0.196982	0.114568	0.203603	0.674582	0.334502	0.785855	0.749614	0.0571641	0.102861	0.127916	0.15284	0.795917	0.670249	0.466854	0.802807	0.914038	0.430157	0.826356	0.836576	0.747039	0.454374	0.788395	0.189606
145	0.792443	0.733073	0.533226	0.874899	0.834069	0.826132	0.668192	0.125454	0.859315	0.873332	0.421291	0.683425	0.183066	0.903928	0.178829	0.251989	0.608041	0.43501	0.858712	0.575602	0.115865	0.269514	0.159894	0.810872	0.198226	0.60196	0.20843	0.119136	0.200689	0.694981	0.382147	0.81213	0.761417	0.0516172	0.134201	0.1267	0.133516	0.803629	0.753901	0.440022	0.818286	0.908892	0.658611	0.816087	0.853321	0.752724	0.45184	0.833078	0.212165
146	0.743318	0.724383	0.549596	0.862352	0.86901	0.836967	0.656932	0.137508	0.840233	0.901112	0.579385	0.675554	0.207991	0.897688	0.160607	0.312616	0.571181	0.501034	0.834013	0.584522	0.136152	0.28299	0.170477	0.812023	0.158881	0.598277	0.22259	0.136688	0.183924	0.683693	0.340215	0.81861	0.744355	0.0346374	0.125003	0.135851	0.141666	0.79488	0.776695	0.531746	0.808665	0.899885	0.5579	0.810561	0.864137	0.738174	0.470158	0.841916	0.194172
147	0.70278	0.708558	0.548617	0.843242	0.762197	0.832986	0.690559	0.158471	0.8516	0.899323	0.502841	0.673725	0.206583	0.866479	0.208871	0.30284	0.526308	0.452099	0.847048	0.538879	0.182593	0.300128	0.189292	0.776241	0.245129	0.482915	0.241579	0.157157	0.20271	0.635231	0.379028	0.743264	0.75386	0.0726522	0.135383	0.169194	0.16716	0.822761	0.676689	0.575757	0.825228	0.913302	0.592081	0.861254	0.857294	0.76604	0.463158	0.778114	0.237714
148	0.768112	0.740067	0.553232	0.84111	0.865882	0.827313	0.68593	0.131264	0.833441	0.881039	0.527823	0.675652	0.18542	0.884212	0.156498	0.332541	0.600398	0.455112	0.871464	0.665072	0.114156	0.281332	0.176458	0.817266	0.168	0.634857	0.196794	0.10708	0.195805	0.687012	0.334841	0.814627	0.767439	0.0401434	0.107282	0.130088	0.141566	0.807012	0.78601	0.540481	0.792697	0.900989	0.519473	0.843223	0.851234	0.73091	0.440816	0.810063	0.181796
149	0.787907	0.740317	0.591779	0.872148	0.832835	0.825436	0.645111	0.13735	0.826226	0.890828	0.588848	0.639421	0.228474	0.893164	0.181871	0.332432	0.586316	0.432745	0.858061	0.570327	0.138365	0.266466	0.173919	0.821408	0.200776	0.504406	0.21353	0.139513	0.200436	0.673478	0.365862	0.791444	0.742489	0.0429466	0.129654	0.137594	0.153305	0.809806	0.783549	0.518362	0.824425	0.908296	0.630031	0.860606	0.863608	0.7798	0.43188	0.803694	0.197801
150	0.76626	0.732266	0.528501	0.848227	0.840551	0.833701	0.644314	0.139188	0.814905	0.884317	0.547036	0.651685	0.205793	0.902492	0.174684	0.325079	0.567056	0.504866	0.851138	0.50402	0.120499	0.268189	0.172288	0.795874	0.22151	0.445241	0.201355	0.124968	0.179475	0.66748	0.332259	0.809141	0.78099	0.044727	0.125911	0.125254	0.156809	0.826247	0.816573	0.621588	0.831982	0.905467	0.63813	0.832831	0.849799	0.752534	0.482708	0.814891	0.202897
151	0.733039	0.725064	0.575054	0.849459	0.851907	0.78948	0.709039	0.154029	0.838174	0.876952	0.529296	0.67985	0.226013	0.894505	0.15611	0.352479	0.596819	0.491154	0.843535	0.519284	0.135015	0.296711	0.195239	0.771151	0.231895	0.600225	0.25312	0.123628	0.191199	0.680611	0.374565	0.806964	0.76086	0.0550125	0.120567	0.167128	0.160337	0.80887	0.824739	0.542722	0.763494	0.91174	0.696352	0.839358	0.8339	0.756928	0.457799	0.85514	0.213388
152	0.788521	0.751337	0.558485	0.852346	0.853118	0.832489	0.739414	0.153555	0.811555	0.885684	0.56458	0.680314	0.205835	0.880982	0.157429	0.3371	0.6004	0.459499	0.846547	0.518856	0.140297	0.298968	0.189559	0.860541	0.202993	0.671454	0.224495	0.132581	0.193564	0.698978	0.388576	0.776747	0.753289	0.0413706	0.130976	0.135433	0.153043	0.794776	0.809169	0.569572	0.806614	0.901742	0.584228	0.830676	0.817829	0.759471	0.458476	0.800671	0.180828
153	0.788677	0.714556	0.476707	0.849393	0.798699	0.81519	0.712049	0.143883	0.820341	0.899417	0.659082	0.590662	0.181249	0.877573	0.235573	0.302564	0.55688	0.501312	0.8533	0.567739	0.147323	0.284919	0.204125	0.792094	0.222269	0.489361	0.221958	0.128557	0.22051	0.650043	0.35418	0.789858	0.729539	0.0330671	0.147236	0.146782	0.156723	0.807368	0.804514	0.633613	0.838095	0.891838	0.656714	0.846292	0.85466	0.763258	0.473238	0.861759	0.189684
154	0.737198	0.727617	0.457731	0.845944	0.753676	0.818566	0.624354	0.119593	0.797455	0.888356	0.532832	0.633827	0.160522	0.871149	0.267766	0.279846	0.581731	0.49499	0.861932	0.535034	0.166529	0.277178	0.200795	0.820082	0.249238	0.459626	0.187149	0.10078	0.162921	0.628499	0.32595	0.81012	0.724346	0.0377393	0.121327	0.116641	0.137682	0.789838	0.794104	0.596703	0.819174	0.903916	0.656809	0.826763	0.842757	0.768028	0.475216	0.848209	0.190683
155	0.761491	0.695707	0.433986	0.84904	0.723193	0.820536	0.604969	0.106094	0.796214	0.905031	0.575093	0.542935	0.161595	0.868109	0.26505	0.298719	0.507185	0.442402	0.867296	0.574673	0.168916	0.252043	0.209959	0.782122	0.282509	0.482933	0.189096	0.0871126	0.183623	0.626043	0.314287	0.814552	0.696445	0.035788	0.139523	0.115964	0.122776	0.812961	0.75633	0.607708	0.82686	0.902966	0.4912	0.840179	0.861703	0.747037	0.46462	0.799205	0.186313
156	0.770993	0.705284	0.462907	0.837194	0.764918	0.833529	0.667331	0.122473	0.837941	0.896547	0.592901	0.613229	0.17763	0.888554	0.204286	0.335734	0.521998	0.525091	0.832245	0.588312	0.125781	0.274784	0.197475	0.744753	0.211728	0.472703	0.219748	0.121816	0.173759	0.620996	0.337304	0.800469	0.748578	0.0282403	0.133347	0.156896	0.157297	0.809539	0.814699	0.586913	0.82757	0.87618	0.669881	0.832304	0.858326	0.772538	0.496922	0.822354	0.179725
157	0.769946	0.764424	0.567713	0.842804	0.840356	0.82412	0.710838	0.148998	0.856519	0.888331	0.537727	0.65906	0.213798	0.887956	0.142772	0.343244	0.609284	0.52213	0.846554	0.576501	0.12703	0.28713	0.179554	0.798369	0.204223	0.576536	0.220124	0.133861	0.212481	0.688546	0.367318	0.846826	0.774917	0.0663665	0.133096	0.143677	0.175727	0.811439	0.785199	0.467432	0.779132	0.897105	0.714976	0.824558	0.821806	0.728594	0.447482	0.868221	0.220848
158	0.649505	0.744701	0.606854	0.795795	0.865785	0.804662	0.713784	0.125989	0.862513	0.871225	0.421263	0.676333	0.204772	0.902437	0.13774	0.328066	0.650919	0.408034	0.862089	0.461552	0.111004	0.272854	0.164097	0.773915	0.213143	0.59083	0.204908	0.154529	0.220832	0.700008	0.398712	0.800568	0.782712	0.0575075	0.123409	0.142899	0.174467	0.783856	0.71454	0.465404	0.77774	0.91055	0.565724	0.814181	0.856543	0.725878	0.462729	0.804503	0.218683
159	0.696368	0.723581	0.547279	0.862382	0.858962	0.812851	0.657221	0.131973	0.831899	0.896822	0.546713	0.649996	0.206902	0.901901	0.148808	0.368476	0.626243	0.518865	0.863817	0.573178	0.12113	0.269454	0.154596	0.812618	0.161043	0.610968	0.220337	0.139355	0.199596	0.695357	0.364491	0.79891	0.772441	0.0357342	0.122706	0.138459	0.150712	0.784367	0.74489	0.499896	0.838914	0.896674	0.667311	0.81518	0.854234	0.713513	0.464501	0.808157	0.208286
160	0.747761	0.723616	0.570138	0.839749	0.844379	0.866459	0.694654	0.150706	0.826694	0.890528	0.529972	0.643024	0.186193	0.907473	0.165803	0.348309	0.599842	0.522713	0.852052	0.569243	0.126422	0.28488	0.182115	0.759189	0.186845	0.541481	0.257914	0.143976	0.197792	0.676417	0.388286	0.808831	0.770087	0.0551289	0.119475	0.162927	0.142709	0.772659	0.725393	0.442423	0.808884	0.909875	0.697751	0.834054	0.845236	0.76501	0.471746	0.807726	0.200884
161	0.800177	0.735069	0.582012	0.852736	0.850195	0.805854	0.65542	0.164354	0.82144	0.892181	0.553867	0.637361	0.180058	0.891046	0.164523	0.363728	0.609092	0.494917	0.846273	0.426896	0.152832	0.313855	0.172742	0.843981	0.210227	0.638635	0.220751	0.155318	0.205374	0.667699	0.372016	0.76124	0.73688	0.0502041	0.119049	0.163543	0.17257	0.790899	0.755396	0.513299	0.823835	0.900917	0.496236	0.845272	0.848871	0.758197	0.467943	0.730524	0.211125
162	0.712487	0.711719	0.508863	0.859628	0.766901	0.824786	0.700436	0.127013	0.837184	0.90313	0.602878	0.632148	0.198244	0.886965	0.227069	0.318469	0.521263	0.518691	0.842252	0.625124	0.121083	0.270109	0.186224	0.817801	0.196796	0.535915	0.211265	0.135881	0.214828	0.657739	0.334393	0.794749	0.724555	0.0309395	0.109676	0.147634	0.159012	0.803254	0.791937	0.576665	0.836715	0.889809	0.552514	0.861934	0.843229	0.768424	0.463197	0.849532	0.185661
163	0.742905	0.733387	0.56006	0.855088	0.864943	0.84133	0.669848	0.191894	0.820918	0.897963	0.66381	0.639177	0.243329	0.903874	0.159473	0.327225	0.543892	0.579281	0.845511	0.629452	0.16101	0.337042	0.187442	0.774464	0.173274	0.640922	0.280316	0.17353	0.174794	0.668222	0.400409	0.826788	0.75248	0.0953359	0.10337	0.165725	0.188677	0.791686	0.737837	0.561657	0.820454	0.916666	0.57599	0.857461	0.83169	0.733412	0.439016	0.80347	0.241112
164	0.764324	0.7005	0.388972	0.851099	0.699054	0.827723	0.685496	0.135143	0.78813	0.904994	0.599079	0.607291	0.195204	0.883824	0.228133	0.313761	0.46901	0.544928	0.863803	0.512296	0.147631	0.281695	0.195751	0.811907	0.274892	0.466661	0.242885	0.121925	0.193693	0.650766	0.337545	0.840467	0.755021	0.0374128	0.148131	0.157973	0.160013	0.815935	0.807384	0.577746	0.813079	0.898712	0.530202	0.832705	0.844909	0.763633	0.491616	0.861084	0.207374
165	0.803779	0.709272	0.500448	0.86064	0.793115	0.83838	0.708918	0.141482	0.804161	0.922676	0.625178	0.613281	0.14205	0.895511	0.237401	0.306869	0.541972	0.523957	0.872988	0.653785	0.10881	0.279785	0.195188	0.824932	0.219579	0.561713	0.203836	0.116203	0.230359	0.640104	0.378837	0.81966	0.699654	0.033	0.13577	0.136594	0.163743	0.826548	0.79684	0.594838	0.819	0.89484	0.610202	0.846315	0.850278	0.782205	0.477673	0.802229	0.207487
166	0.690847	0.768386	0.648995	0.839355	0.87505	0.82836	0.758253	0.172138	0.851936	0.87464	0.511806	0.710462	0.253082	0.920401	0.130223	0.373266	0.650353	0.484184	0.84062	0.543994	0.11198	0.329997	0.124664	0.825942	0.168971	0.634946	0.272517	0.174868	0.205016	0.714631	0.430524	0.755307	0.7742	0.0633936	0.0919285	0.176692	0.184167	0.786483	0.712195	0.379229	0.795478	0.928345	0.569591	0.813812	0.825653	0.746054	0.448893	0.784747	0.274244
167	0.643547	0.727122	0.489481	0.787042	0.798335	0.801667	0.690161	0.110001	0.834683	0.881503	0.496561	0.626424	0.139787	0.887799	0.204946	0.321039	0.575635	0.497102	0.867156	0.588336	0.127051	0.241879	0.168858	0.811438	0.244496	0.525308	0.168322	0.0881368	0.164515	0.638047	0.323025	0.817932	0.76138	0.0553529	0.126133	0.103292	0.129588	0.793971	0.760231	0.536893	0.808582	0.915454	0.674146	0.819357	0.834636	0.743448	0.462286	0.838854	0.205855
168	0.752791	0.708327	0.473346	0.84331	0.777949	0.821574	0.652498	0.134396	0.798515	0.907267	0.641574	0.64802	0.17742	0.878133	0.201638	0.302179	0.547018	0.50481	0.8517	0.612361	0.140109	0.265473	0.16956	0.790976	0.175317	0.498416	0.192909	0.108917	0.218145	0.681967	0.315287	0.804568	0.737348	0.0295677	0.118429	0.146002	0.153994	0.821613	0.816693	0.510384	0.803729	0.877737	0.678865	0.835606	0.849361	0.777944	0.479893	0.820299	0.194453
169	0.740156	0.732856	0.572055	0.849978	0.852038	0.826669	0.630518	0.149528	0.839211	0.89971	0.620018	0.622679	0.211771	0.883169	0.166592	0.366259	0.567933	0.480669	0.851986	0.587082	0.127889	0.271363	0.164679	0.84891	0.206262	0.47116	0.194275	0.132814	0.181579	0.70903	0.339174	0.829155	0.744204	0.0336809	0.133856	0.155845	0.158737	0.79419	0.85612	0.612092	0.830471	0.888473	0.615145	0.846358	0.841507	0.749573	0.447782	0.792076	0.184949
170	0.724034	0.74356	0.513067	0.810653	0.81334	0.822553	0.705943	0.105269	0.828388	0.882368	0.555851	0.619784	0.152316	0.882833	0.193716	0.30244	0.552809	0.460409	0.86496	0.54395	0.141935	0.257876	0.212348	0.838556	0.289125	0.552801	0.193393	0.112159	0.157346	0.642598	0.33027	0.813339	0.723916	0.0828053	0.143248	0.10227	0.108523	0.788021	0.605852	0.631228	0.817486	0.904126	0.644421	0.832229	0.869262	0.749413	0.429648	0.838245	0.184561
171	0.662718	0.739025	0.4419	0.811667	0.779157	0.814954	0.664295	0.113908	0.819569	0.908524	0.553096	0.605525	0.15919	0.876979	0.23298	0.26646	0.532269	0.533641	0.84147	0.603823	0.107803	0.230087	0.19949	0.81561	0.259183	0.541059	0.169676	0.0902197	0.153391	0.631745	0.336654	0.826986	0.763435	0.045232	0.121821	0.108545	0.117907	0.808188	0.795328	0.547873	0.831496	0.886609	0.672885	0.833774	0.87434	0.790326	0.476146	0.852632	0.178867
172	0.686899	0.736274	0.554031	0.808461	0.796558	0.80175	0.775143	0.127253	0.851452	0.874304	0.495644	0.646617	0.190325	0.896185	0.204574	0.321698	0.590386	0.480103	0.815468	0.490897	0.104222	0.284353	0.191597	0.845338	0.224839	0.722131	0.216468	0.148317	0.2186	0.679943	0.400288	0.766795	0.752388	0.0640656	0.112379	0.139714	0.172907	0.804304	0.720479	0.514283	0.800793	0.909652	0.457885	0.81861	0.848602	0.721964	0.472902	0.814903	0.214213
173	0.635816	0.72385	0.658355	0.821436	0.86839	0.823337	0.726648	0.146403	0.829287	0.880499	0.47879	0.723003	0.212065	0.903144	0.151215	0.348859	0.67718	0.46077	0.822644	0.445949	0.130137	0.326218	0.135495	0.874407	0.173858	0.709613	0.244157	0.17406	0.192103	0.693905	0.383542	0.781534	0.764755	0.0927749	0.0971011	0.180764	0.167764	0.768596	0.717031	0.480593	0.791678	0.918093	0.478947	0.818357	0.843381	0.748448	0.431747	0.731498	0.264343
174	0.750657	0.714583	0.504942	0.821584	0.808458	0.844058	0.657459	0.128278	0.82028	0.889744	0.52214	0.625194	0.160881	0.888544	0.190583	0.33898	0.549324	0.492586	0.843688	0.493012	0.128557	0.277236	0.212492	0.779786	0.212412	0.536738	0.202576	0.100583	0.194517	0.632902	0.324527	0.805896	0.729701	0.0595077	0.132823	0.127747	0.140486	0.806037	0.659019	0.622261	0.839846	0.900463	0.529699	0.838557	0.850602	0.741929	0.46289	0.76965	0.198554
175	0.763831	0.72204	0.556729	0.825703	0.859328	0.817374	0.65746	0.143856	0.819212	0.86959	0.577824	0.629511	0.177867	0.886453	0.201721	0.336788	0.627273	0.486848	0.858137	0.587545	0.133725	0.275342	0.181336	0.770333	0.186347	0.5669	0.212907	0.132663	0.185629	0.683588	0.38201	0.816929	0.754397	0.0474931	0.126073	0.136037	0.126619	0.819971	0.815801	0.442461	0.790429	0.909092	0.603733	0.840951	0.862871	0.758244	0.452354	0.824178	0.218123
176	0.704884	0.722283	0.54391	0.818215	0.78712	0.819197	0.718682	0.138174	0.843167	0.882343	0.471679	0.636455	0.168488	0.889821	0.178029	0.327857	0.563049	0.474794	0.847605	0.493402	0.126626	0.263424	0.148032	0.79663	0.234735	0.525037	0.2124	0.126072	0.202578	0.656289	0.360305	0.766741	0.748571	0.0763307	0.135644	0.136206	0.147536	0.784538	0.655808	0.453467	0.804164	0.910798	0.426987	0.830538	0.847474	0.722596	0.46183	0.771852	0.228986
177	0.675438	0.712669	0.542118	0.790615	0.800802	0.806537	0.656281	0.133216	0.802425	0.885562	0.623397	0.583369	0.173999	0.891911	0.198581	0.328166	0.563025	0.513292	0.876765	0.639031	0.153688	0.258401	0.227386	0.828344	0.208595	0.495575	0.200778	0.0989179	0.161901	0.623804	0.331518	0.833456	0.769361	0.0590941	0.126651	0.128058	0.138567	0.808574	0.737041	0.66788	0.840661	0.898866	0.620287	0.838417	0.840978	0.742188	0.451849	0.818685	0.201022
178	0.803807	0.728085	0.487673	0.86753	0.784173	0.810568	0.706855	0.129413	0.816976	0.896845	0.636852	0.648381	0.206982	0.867052	0.260458	0.305031	0.535702	0.480535	0.846522	0.551984	0.139344	0.265947	0.199242	0.84409	0.254882	0.516135	0.197318	0.113817	0.201661	0.665226	0.347639	0.82382	0.728105	0.0258667	0.130791	0.148094	0.16312	0.801939	0.842213	0.590834	0.8503	0.888309	0.544119	0.823144	0.845588	0.784512	0.477024	0.810391	0.213104
179	0.779725	0.727933	0.567638	0.855215	0.856876	0.833611	0.679904	0.147941	0.818758	0.916869	0.600055	0.647147	0.224056	0.899906	0.131116	0.355958	0.563462	0.56526	0.841792	0.563118	0.117877	0.306053	0.184484	0.732455	0.201417	0.524649	0.249209	0.155108	0.221424	0.7034	0.368275	0.808958	0.760707	0.0471062	0.122202	0.167648	0.182069	0.78452	0.780193	0.495788	0.836321	0.894159	0.558722	0.838373	0.847404	0.758271	0.477628	0.845811	0.225356
180	0.754442	0.724498	0.522443	0.846344	0.795054	0.826581	0.639628	0.140268	0.828192	0.895518	0.506744	0.633466	0.18885	0.884883	0.182112	0.313847	0.546707	0.470546	0.883243	0.542976	0.163895	0.302391	0.217672	0.806598	0.211595	0.470595	0.193048	0.121177	0.167164	0.630328	0.332149	0.727547	0.743113	0.0468711	0.147467	0.123269	0.129945	0.795644	0.713186	0.628323	0.821561	0.910118	0.597258	0.846435	0.862451	0.674075	0.477173	0.594673	0.220753
Supplemental Table 4. Full methylation for n=180 subjects at 909 CpGs used in the study analysis.
[truncated: 860 more columns]

## Sheet: Supplemental Table 5
	Model 1					Model 2
	Smo		mMTHFR			Smo		mMTHFR		Smo × mMTHFR
CpG	b	p-value	b	p-value		b	p-value	b	p-value	b	p-value
cg00095276	-0.120103	0.00139679	0.0287572	0.523582		-0.118296	0.00145494	-0.0664994	0.244247	0.199405	0.0111764
cg00155844	0.0570424	1.47765e-05	-0.0373079	0.0166867		0.0568612	1.26553e-05	-0.0135591	0.499213	-0.0524856	0.0612924
cg00389785	0.252996	8.54343e-13	-0.146887	0.000524266		0.252721	8.08127e-13	-0.11711	0.0330226	-0.0644642	0.398724
cg00642607	-0.0613034	0.0145808	-0.0326166	0.285758		-0.0613093	0.00994936	-0.154366	2.30195e-05	0.2523	5.9485e-07
cg00649216	0.19214	4.09064e-06	-0.183465	0.000154967		0.191699	4.40428e-06	-0.197355	0.000923275	0.0350261	0.690822
cg00690392	-0.0475121	0.00264541	0.0197575	0.300407		-0.0468609	0.00250533	-0.0269363	0.267101	0.0973096	0.00346613
cg00727386	0.0820595	0.000207093	-0.0626075	0.0160278		0.0817617	0.000204856	-0.038783	0.24744	-0.0528431	0.261067
cg00736283	0.0987717	4.59957e-05	-0.00414001	0.887291		0.0987463	4.52331e-05	-0.0145918	0.714029	0.0206211	0.697986
cg00746487	0.114118	6.29766e-09	-0.0658076	0.00389599		0.114206	5.73106e-09	-0.0856731	0.00264771	0.047073	0.255271
cg00833661	-0.0507193	0.0405539	0.0623166	0.041511		-0.0492179	0.0427057	-0.0242409	0.535605	0.169383	0.00126848
cg01097768	-0.150197	4.66358e-05	0.0854385	0.054948		-0.149033	4.1523e-05	-0.00437563	0.938768	0.188523	0.0162014
cg01344787	0.124947	1.39221e-10	-0.0876315	0.0001409		0.124807	1.28132e-10	-0.0701067	0.0178268	-0.0393178	0.345228
cg01612443	0.0702528	0.0229378	0.0329103	0.392836		0.0717476	0.0181886	0.138828	0.00534559	-0.201962	0.00235793
cg01638829	0.100517	4.15301e-06	-0.0587254	0.0211734		0.100567	3.70296e-06	-0.0388746	0.232357	-0.0461581	0.321016
cg01693063	-0.132092	1.634e-05	0.222079	5.45872e-10		-0.131901	1.71058e-05	0.2269	4.68249e-07	-0.0114235	0.860389
cg01837661	0.100313	7.39283e-06	-0.0848407	0.00156472		0.100059	7.81066e-06	-0.0738868	0.0381029	-0.022554	0.640991
cg01852611	0.183262	2.47862e-11	-0.099025	0.00241878		0.182659	1.33906e-11	-0.0362755	0.379535	-0.139252	0.0164112
cg01899089	-0.132202	4.88155e-11	-0.0133146	0.577548		-0.131835	4.62621e-11	-0.0375246	0.226843	0.0521287	0.225401
cg01938570	-0.0690155	0.0017109	0.0565593	0.0366097		-0.0674532	0.00169571	-0.0225968	0.510767	0.158185	0.000676213
cg01940273	-0.321813	2.50895e-38	-0.0863012	0.00346864		-0.321623	2.25704e-38	-0.104091	0.00710708	0.0378065	0.477436
cg02111705	-0.0439018	0.0541273	0.21698	4.06277e-16		-0.0449411	0.0485164	0.201571	3.74032e-09	0.0353684	0.467626
cg02171500	0.0449427	0.0168573	-0.0285916	0.20572		0.0448723	0.0170513	-0.0235596	0.431591	-0.0104325	0.798551
cg02227015	-0.0799671	2.08846e-05	0.182586	1.16587e-16		-0.0799601	2.1252e-05	0.182254	1.03646e-10	0.000743569	0.985183
cg02247175	0.284017	2.84344e-19	0.00430476	0.906346		0.282519	3.86831e-20	0.08274	0.0707748	-0.191235	0.00381244
cg02292066	-0.114806	8.45647e-05	0.272321	2.13588e-15		-0.113178	0.000107764	0.298179	4.50229e-12	-0.0604978	0.328611
cg02319016	0.413379	1.61399e-19	-0.192476	0.000526643		0.413868	4.80109e-21	-0.029017	0.66648	-0.364694	0.000140573
cg02392575	0.0556227	0.0165863	-0.0237932	0.393252		0.0555642	0.0167343	-0.0192505	0.60264	-0.00939466	0.85189
cg02521854	0.0848216	0.00358573	-0.0472728	0.182711		0.0848887	0.00354224	-0.0533053	0.271251	0.0117648	0.854462
cg02569236	0.0859132	0.000464205	0.0636068	0.037207		0.0868899	0.000354851	0.12482	0.00188177	-0.119357	0.0261668
cg02578836	0.034052	0.0485364	-0.11927	4.99346e-09		0.0340486	0.0482908	-0.110086	2.89969e-05	-0.0203885	0.581169
cg02641288	0.0389092	0.0157593	-0.0483872	0.012121		0.0387682	0.0160936	-0.0388432	0.126744	-0.0199432	0.56654
cg02657160	-0.237976	9.69999e-34	-0.0477577	0.0435304		-0.23853	1.14965e-34	-0.0989014	0.00159659	0.0993726	0.017376
cg02671915	0.0631109	0.000537989	-0.138322	9.7418e-11		0.0633727	0.00045101	-0.109601	6.23243e-05	-0.0648615	0.0932446
cg02720697	0.2266	1.55394e-06	-0.0028351	0.959655		0.22676	1.56102e-06	0.075929	0.302817	-0.150962	0.123181
cg02995567	-0.0991876	8.75662e-07	0.0434102	0.0619254		-0.0996339	3.13216e-07	-0.0141927	0.624785	0.138431	0.000934168
cg03046325	0.0711237	0.00291218	-0.0362554	0.208554		0.0711267	0.00291386	-0.0364689	0.348662	0.000426386	0.993479
cg03168249	0.0645678	0.00191966	-0.0384803	0.126028		0.0645324	0.00193645	-0.0358593	0.288862	-0.00526404	0.907793
cg03333116	-0.0439434	0.00744154	0.0219795	0.271994		-0.0428887	0.00639625	-0.0494736	0.0465517	0.14579	1.70974e-05
cg03384915	-0.256772	1.16994e-10	-0.0342147	0.469837		-0.256824	1.15805e-10	-0.0695086	0.268332	0.0710628	0.400328
cg03467813	-0.0924769	0.0125466	0.0981825	0.0289122		-0.0913589	0.0122514	0.00348357	0.951658	0.196276	0.0127594
cg03482600	-0.0988256	0.00150521	-0.0109169	0.776964		-0.0996845	0.00120268	-0.0998726	0.0457658	0.173522	0.00962667
cg03603505	0.0656044	0.000499535	-0.0151532	0.484652		0.0647293	0.000452711	0.0266031	0.334393	-0.0974365	0.0131806
cg03636183	-0.426172	1.61656e-25	-0.0850619	0.0796142		-0.426245	1.50957e-25	-0.0725888	0.259333	-0.0258861	0.767521
cg03662571	-0.0514804	0.0161281	0.00925026	0.726811		-0.0510193	0.012344	-0.0958176	0.00338624	0.207191	2.80213e-06
cg03775901	-0.0206613	0.222196	0.0593908	0.00320628		-0.0201892	0.232877	0.0452712	0.0839661	0.0302185	0.403893
cg03811905	-0.0484461	0.00673661	0.0101489	0.640678		-0.0482441	0.00649984	-0.0281115	0.325441	0.0769428	0.0461699
cg03862705	-0.0436106	4.80447e-05	0.0119778	0.347518		-0.0433923	4.75401e-05	-0.00318976	0.847337	0.0326606	0.154214
cg03991871	-0.29599	7.77871e-15	-0.0869716	0.0558146		-0.296793	6.878e-15	-0.123225	0.0471812	0.0688389	0.400598
cg04031757	0.075084	1.79623e-05	-0.0248081	0.233463		0.0751051	1.77865e-05	-0.0277749	0.311722	0.0061795	0.869224
cg04042800	0.0612741	7.66663e-05	-0.110251	1.11506e-09		0.061474	6.78252e-05	-0.0949428	4.46407e-05	-0.0344937	0.292357
cg04120407	0.153306	2.94168e-10	-0.0921848	0.000775812		0.153532	1.11536e-10	-0.0428017	0.214138	-0.121512	0.0148723
cg04140754	-0.0600476	0.00281579	0.118462	6.59817e-07		-0.0599562	0.00285226	0.128209	2.90769e-05	-0.0216463	0.615023
cg04179819	0.0573239	0.00271029	-0.0025477	0.911539		0.0572215	0.00273237	0.0146081	0.628987	-0.0355509	0.389281
cg04194664	-0.195516	1.78555e-05	-0.00468757	0.930646		-0.194295	1.90185e-05	-0.0851732	0.215465	0.167837	0.074865
cg04629194	0.0750951	0.000456108	-0.00583018	0.820844		0.0751855	0.000435326	-0.0204486	0.559237	0.0290201	0.534855
cg04677326	0.0948561	9.84031e-05	-0.0305196	0.296404		0.0947356	0.000100857	-0.0177522	0.650222	-0.0257034	0.625983
cg04689145	0.153993	2.30456e-11	-0.0657977	0.0147467		0.153986	2.01977e-11	-0.0489543	0.153943	-0.0390999	0.424592
cg04885881	-0.204883	6.03763e-07	-0.132562	0.00500981		-0.200171	4.81133e-07	-0.250834	2.03992e-05	0.277604	0.000961098
cg04950839	0.0940402	0.00592413	-0.104024	0.0140767		0.0937696	0.00613322	-0.094483	0.113216	-0.0174167	0.82107
cg05062814	0.0401744	0.0513049	-0.0324878	0.187317		0.0400171	0.0522606	-0.0233636	0.473843	-0.0189501	0.669978
cg05079547	-0.0953597	0.0267098	-0.0438105	0.410045		-0.096445	0.0176144	-0.261088	2.78974e-05	0.444826	2.41604e-07
cg05157912	0.152775	3.10151e-09	-0.0385698	0.214214		0.152295	3.0307e-09	0.00812527	0.842609	-0.0926626	0.0919788
cg05347948	0.145193	3.35466e-09	-0.096838	0.000813992		0.145167	2.95003e-09	-0.0748012	0.0440004	-0.0498338	0.342018
cg05457881	-0.136651	1.45772e-13	0.127663	8.32046e-09		-0.136085	1.61716e-13	0.149493	1.23401e-07	-0.0487032	0.222082
cg05573133	0.0888507	0.00286321	-0.0506035	0.16431		0.0889355	0.00282376	-0.0571694	0.251641	0.0127422	0.846829
cg05575921	-0.761516	0	-0.110253	0.0301469		-0.761294	0	-0.104184	0.153987	-0.0107387	0.907733
cg05587870	0.107794	1.42883e-11	-0.0704669	0.000189622		0.107762	1.434e-11	-0.0679541	0.00527477	-0.00561063	0.869778
cg05620791	0.12887	3.96331e-10	-0.0189706	0.43086		0.128247	3.18084e-10	0.0126223	0.680229	-0.0734928	0.0917851
cg05707844	-0.118559	2.7296e-10	0.0754663	0.000690691		-0.11848	2.07319e-10	0.0474484	0.0982357	0.0615119	0.124482
cg05874167	0.0829383	3.49236e-06	-0.101481	1.79039e-06		0.0829163	3.50802e-06	-0.0985873	0.000356082	-0.00629628	0.869938
cg05916255	0.0682268	4.09102e-06	0.000100241	0.995431		0.0676668	4.1418e-06	0.0219834	0.332859	-0.0482128	0.129171
cg05920998	0.0812736	0.000667161	-0.046738	0.0885192		0.0810764	0.000581655	-0.00732259	0.834731	-0.092029	0.0660167
cg05944967	0.103725	0.00518095	-0.0645948	0.1316		0.103862	0.00463009	-0.012548	0.819834	-0.121605	0.120934
cg05951221	-0.320749	1.49587e-26	-0.0492208	0.173427		-0.321518	9.46877e-27	-0.0159402	0.731626	-0.0728436	0.263101
cg06126421	-0.454711	2.75207e-30	-0.108639	0.0191295		-0.454002	1.03879e-30	-0.0438035	0.486769	-0.129058	0.123291
cg06378498	0.095236	6.08426e-05	-0.0309073	0.273856		0.0952918	6.02561e-05	-0.0334549	0.374377	0.00526368	0.918196
cg06438056	-0.184763	9.80149e-05	0.324289	6.14794e-09		-0.181764	0.000127424	0.374431	7.55e-08	-0.119853	0.233579
cg06897921	0.128256	2.88073e-05	-0.0838935	0.0208096		0.128821	2.51028e-05	-0.107644	0.0305371	0.046567	0.480082
cg06936779	-0.16322	6.66069e-08	0.206337	9.59657e-09		-0.163384	6.20686e-08	0.189377	4.2608e-05	0.0377612	0.561336
cg06972908	-0.132314	6.10553e-06	0.139586	6.61858e-05		-0.132306	6.16953e-06	0.139304	0.00249593	0.000595309	0.992475
cg07065737	-0.0237838	0.214475	-0.00662728	0.777295		-0.0235865	0.20481	-0.0782469	0.00818738	0.145515	0.000306156
cg07120806	-0.144371	0.000112532	0.277595	1.61283e-10		-0.143762	0.000124228	0.286329	1.14336e-07	-0.0214324	0.786367
cg07334509	0.100372	3.35035e-05	-0.0684625	0.014757		0.100186	3.07733e-05	-0.0430851	0.225153	-0.0607815	0.235338
cg07404400	0.082585	0.00108653	-0.0539455	0.0760951		0.0827214	0.00106176	-0.0601669	0.140194	0.0126263	0.818368
cg07500957	-0.0639174	0.0055661	0.0163429	0.564776		-0.0635345	0.00427283	-0.0815973	0.0215175	0.195413	4.86027e-05
cg07598331	-0.0685704	0.00449062	0.061506	0.0394802		-0.0679317	0.00441141	-0.00363528	0.926012	0.127564	0.0150072
cg07972458	-0.0808706	0.00724721	-0.0718266	0.0417764		-0.0788727	0.00681242	-0.167287	0.000140141	0.213648	0.00055024
cg08026195	-0.151906	3.46178e-11	0.108621	5.11312e-05		-0.152	3.24185e-11	0.101019	0.00284275	0.0179442	0.712001
cg08283318	0.125725	4.37267e-07	-0.143746	1.20717e-06		0.125705	3.57738e-07	-0.105465	0.00548808	-0.0841751	0.113172
cg08360253	0.087164	3.73172e-06	-0.00204236	0.927731		0.0871291	3.77808e-06	0.00345374	0.909079	-0.0110668	0.786109
cg08369295	0.0730057	0.000351112	-0.0766832	0.00122611		0.073281	0.000285701	-0.046308	0.123944	-0.0725169	0.0945869
cg08451992	0.0743121	0.000193052	-0.00110008	0.963229		0.0743076	0.000193852	0.00167605	0.958344	-0.00558082	0.897243
cg08488494	0.0842678	0.00023132	-0.170366	2.04351e-10		0.0842479	0.000232582	-0.171112	5.67463e-07	0.00163912	0.97312
cg08528204	-0.065315	0.000104445	0.155103	5.13134e-15		-0.0646475	0.000115756	0.178149	1.39307e-12	-0.0520146	0.145038
cg08531017	-0.0972744	0.00136237	0.00708094	0.845203		-0.0964818	0.00142935	-0.0444894	0.33828	0.109023	0.088882
cg08532673	-0.0628779	0.00186354	0.0062499	0.802414		-0.0624341	0.00154885	-0.0649103	0.0400711	0.14444	0.000788033
cg08621418	-0.138539	6.60604e-07	0.277354	4.58119e-18		-0.14042	4.5511e-07	0.256488	1.78476e-10	0.0506742	0.385904
cg08668662	0.0797694	0.000710032	-0.0288847	0.30937		0.0799916	0.000666869	-0.0442289	0.253545	0.0302832	0.557586
cg08672695	0.452368	1.42194e-23	-0.219952	7.99202e-05		0.45158	7.16963e-25	-0.0617352	0.371935	-0.33019	0.000584994
cg08750493	-0.0849523	8.54441e-05	0.0606917	0.0206084		-0.0842582	9.45781e-05	0.0297412	0.388499	0.0626279	0.17863
cg08828868	0.0468245	0.0427439	-0.01044	0.707681		0.0467447	0.0431433	0.00306267	0.934162	-0.0275189	0.583805
cg08866608	0.15091	9.88402e-05	-0.063252	0.198622		0.149449	8.72111e-05	0.0956407	0.12947	-0.290566	0.000469224
cg09011231	-0.110965	2.12819e-06	0.0967634	0.000660692		-0.110188	2.30396e-06	0.0613328	0.10489	0.0707567	0.164746
cg09174741	0.12555	3.59424e-10	-0.0302726	0.201284		0.125204	2.6677e-10	0.00191397	0.949896	-0.0725208	0.090799
cg09552983	0.130402	8.94614e-10	-0.101169	6.48099e-05		0.130324	9.11354e-10	-0.111563	0.00061355	0.0231899	0.611838
cg09606015	0.138519	1.13118e-05	-0.104048	0.00662867		0.13784	1.27951e-05	-0.0809327	0.121462	-0.0444139	0.521042
cg09741592	-0.187552	2.04136e-22	0.0683601	0.00286893		-0.187649	1.46577e-22	0.0527374	0.0775223	0.0342699	0.411877
cg09773647	0.129509	8.28269e-10	-0.156133	3.20461e-10		0.129568	8.04435e-10	-0.151762	1.46931e-06	-0.0101293	0.821885
cg09908764	-0.101607	9.73558e-06	0.211157	9.06921e-15		-0.101575	9.2075e-06	0.236533	2.10222e-11	-0.0554338	0.260138
cg09917026	0.175275	1.06341e-13	-0.0210325	0.439356		0.175045	4.22776e-14	0.0217831	0.522989	-0.10606	0.0329201
cg09935388	-0.460818	1.70713e-15	0.0374778	0.573136		-0.462584	7.6509e-16	0.114286	0.200849	-0.159632	0.184846
cg09999563	0.056936	0.00416824	0.0114824	0.62851		0.0569125	0.00418703	0.0189781	0.546069	-0.0154984	0.717287
cg10000843	0.0764588	0.000157391	-0.0255406	0.289183		0.0767426	0.000143509	-0.0401424	0.216903	0.0296193	0.500129
cg10094624	0.101138	0.000335697	-0.0111784	0.741379		0.101165	0.000334679	-0.01075	0.812489	-0.000813874	0.989379
cg10216717	-0.0869518	0.00091452	-0.0825591	0.00968786		-0.0882026	0.000371759	-0.210583	4.89079e-08	0.264046	6.47978e-07
cg10351795	0.23088	4.77409e-14	-0.0904907	0.012629		0.230746	4.41768e-14	-0.0716657	0.121349	-0.0431333	0.511806
cg10369313	0.097387	9.29087e-08	-0.0643969	0.0027117		0.0972703	7.42414e-08	-0.0378596	0.168518	-0.0604074	0.119897
cg10430189	0.0464954	0.00119878	-0.086398	4.16229e-07		0.0464976	0.00119542	-0.0826922	0.000199187	-0.00801391	0.795302
cg10572794	0.0789195	0.000503649	-0.0164972	0.543354		0.0792121	0.000448847	-0.041834	0.25755	0.0505324	0.306244
cg10588834	-0.0678207	0.00920676	0.116677	0.000212391		-0.0661466	0.0107778	0.0703022	0.0860284	0.0954692	0.0877877
cg10646962	0.206949	1.55089e-11	-0.179914	7.82683e-07		0.207838	7.82528e-12	-0.128352	0.00526373	-0.117533	0.0722244
cg10964388	-0.132187	4.42549e-05	0.0170312	0.662393		-0.131077	4.28727e-05	-0.0647495	0.193409	0.167144	0.0137506
cg11140305	0.0628366	0.00326782	-0.0478607	0.0546947		0.0626596	0.00317889	-0.0266617	0.404471	-0.0490695	0.282291
cg11168432	0.0904592	0.00147484	-0.00711447	0.821892		0.0885905	0.00149555	0.044315	0.26106	-0.13098	0.0241068
cg11206312	0.0746123	0.000918055	-0.0442513	0.103858		0.0743546	0.000948877	-0.0219689	0.544475	-0.0447299	0.360127
cg11213199	-0.0737364	9.09251e-10	0.064724	6.42471e-06		-0.0741208	5.23048e-10	0.0865844	3.78775e-06	-0.0463737	0.0717337
cg11550862	0.121084	3.49184e-07	-0.0650721	0.0173778		0.12123	2.33692e-07	-0.0269521	0.437401	-0.0919865	0.0671066
cg11553667	0.321191	3.16193e-14	-0.231526	6.96673e-06		0.321068	7.39942e-15	-0.107726	0.0926765	-0.268368	0.00281682
cg11556164	-0.238444	4.80548e-12	-0.00360395	0.928824		-0.238928	3.52062e-12	0.0309744	0.562844	-0.0721957	0.321478
cg11565042	0.153001	5.52455e-09	-0.155803	4.87224e-07		0.151754	6.89726e-09	-0.188912	9.14733e-07	0.0778757	0.162085
cg11580351	-0.140587	0.000626562	0.0429011	0.398002		-0.140328	0.000463736	-0.113544	0.0732467	0.310905	0.000306142
cg11649016	-0.0571354	0.00229441	-0.0143392	0.534579		-0.0570361	0.0013949	-0.104624	0.000236487	0.180189	3.05474e-06
cg11804350	0.292003	6.52854e-13	-0.105077	0.0291485		0.291442	2.28528e-13	-0.00571635	0.924231	-0.227197	0.00787547
cg11809157	0.138443	8.66111e-15	0.0161548	0.444402		0.138365	8.64949e-15	0.0331933	0.241197	-0.0338555	0.3735
cg11843502	0.0444609	0.0321927	0.00611891	0.805723		0.0443319	0.0318739	0.0415144	0.200997	-0.0730535	0.0998792
cg12317505	0.0714292	6.34679e-05	-0.0698294	0.00113396		0.071466	6.07707e-05	-0.0882211	0.00153326	0.0395251	0.305459
cg12416053	-0.149189	5.64612e-08	-0.0700573	0.0302835		-0.149324	5.49655e-08	-0.0909386	0.0315789	0.043698	0.450538
cg12432846	-0.200127	9.43147e-07	0.262175	2.76211e-08		-0.201508	7.71212e-07	0.239713	4.63729e-05	0.0555085	0.52098
cg12484845	-0.101869	3.87277e-05	0.200256	1.22941e-11		-0.103107	2.82984e-05	0.234429	2.60528e-09	-0.0708743	0.185638
cg12636538	0.119742	2.30332e-07	0.0112491	0.682967		0.119914	1.80631e-07	-0.0223304	0.544697	0.0690016	0.166554
cg12880967	0.071552	0.00482666	0.050676	0.106177		0.0730904	0.00352592	0.128304	0.00183767	-0.148244	0.00680088
cg12950624	0.192711	1.17349e-15	-0.0450396	0.124063		0.19266	1.22701e-15	-0.0415791	0.303354	-0.00659	0.901228
cg12992443	-0.0804982	0.000162805	-0.0313961	0.22729		-0.0805571	0.00012747	-0.0912383	0.00688448	0.119959	0.00854404
cg13086586	-0.166446	2.11199e-11	0.180275	6.00807e-10		-0.166983	1.67029e-11	0.164747	7.38315e-06	0.0368123	0.486609
cg13324357	0.163321	1.30638e-10	-0.0864168	0.00317254		0.163274	1.02824e-10	-0.0620995	0.0904446	-0.0599744	0.263184
cg13397649	0.0940229	0.000182146	-0.025736	0.396257		0.0938825	0.0001874	-0.0128215	0.752344	-0.0259364	0.635535
cg13440641	0.0901173	1.71317e-05	-0.0180784	0.472168		0.0899736	1.774e-05	-0.00399168	0.905584	-0.0282199	0.533589
cg13461130	0.0917942	2.58962e-05	-0.0762419	0.00258335		0.092274	1.4977e-05	-0.0269988	0.399088	-0.117732	0.0103876
cg13566059	0.199872	1.72798e-05	-0.0400333	0.465368		0.198165	1.40026e-05	0.065817	0.354911	-0.236603	0.0177548
cg13576178	0.102264	7.82957e-06	-0.00368154	0.892919		0.102229	7.93267e-06	0.00824014	0.82167	-0.0239405	0.628525
cg13668025	-0.0806025	1.11945e-06	0.147835	3.91596e-14		-0.0804587	1.15374e-06	0.157977	3.90562e-10	-0.0223409	0.527275
cg13675319	0.169334	1.22769e-07	-0.134609	0.00024397		0.169765	9.50284e-08	-0.103736	0.0233117	-0.076746	0.251517
cg13762887	0.104874	7.84467e-09	-0.00931962	0.661911		0.104434	4.96874e-09	0.0272947	0.315668	-0.0846715	0.0279887
cg13789443	0.153194	3.43621e-16	-0.114625	3.06842e-07		0.152748	1.19617e-16	-0.0673928	0.0184528	-0.102041	0.0102323
cg14082938	0.0912705	4.67878e-07	-0.0635394	0.00257961		0.0913016	3.37801e-07	-0.0332502	0.218434	-0.0691019	0.0701229
cg14195606	0.0942351	1.17179e-06	-0.118772	2.02185e-07		0.094378	7.43252e-07	-0.0774626	0.00751144	-0.0943265	0.0215878
cg14254999	-0.170145	1.30542e-05	-0.00402439	0.935332		-0.172409	4.59743e-06	-0.196398	0.00147283	0.354022	1.46226e-05
cg14628803	0.111723	1.95712e-08	-0.121126	1.9913e-07		0.111792	1.83603e-08	-0.111198	0.000185545	-0.0226823	0.591317
cg14651082	-0.0610742	0.000542547	0.00912534	0.670481		-0.060534	0.000445647	-0.0486672	0.0751395	0.11872	0.00144592
cg14719752	0.0340891	0.0985246	-0.105721	1.21504e-05		0.0348332	0.0876223	-0.0718172	0.0216436	-0.0767641	0.0816072
cg14743683	-0.0365108	0.0355421	-0.0275252	0.185061		-0.0362972	0.0349269	-0.064041	0.01598	0.0778514	0.034533
cg14791530	-0.131496	1.82215e-06	0.00106382	0.974793		-0.131385	1.43827e-06	-0.0693882	0.11538	0.138692	0.0189648
cg14905634	-0.10271	0.0193748	-0.0295069	0.578215		-0.101958	0.0145939	-0.224836	0.000394466	0.415741	2.61861e-06
cg14941559	0.108608	2.07431e-09	-0.0178004	0.403565		0.108022	1.5565e-09	0.0165183	0.546377	-0.0769396	0.045731
cg15010854	-0.182849	6.62606e-08	0.232057	4.49885e-09		-0.181972	8.05337e-08	0.247248	6.18721e-07	-0.036177	0.614621
cg15105252	-0.0686206	2.46128e-06	0.0793967	4.59869e-06		-0.0687642	2.04262e-06	0.10135	6.09079e-06	-0.047486	0.126723
cg15281724	0.31899	6.00724e-19	-0.151384	0.000312466		0.319929	3.09013e-20	-0.0507308	0.322752	-0.243537	0.00108966
cg15514751	0.330414	1.57307e-29	0.054146	0.114173		0.328398	2.1328e-30	0.120645	0.00613705	-0.152455	0.0142613
cg15614155	0.193152	1.32285e-11	-0.165927	5.71697e-07		0.194316	5.7604e-12	-0.120367	0.00404193	-0.107807	0.0729611
cg15645254	0.0877012	4.19443e-09	-0.0340466	0.0525553		0.0872828	2.21643e-09	0.00399663	0.857895	-0.0853641	0.00650564
cg15658543	0.172797	3.39297e-11	0.0333806	0.279063		0.172007	3.60053e-11	0.0545501	0.16906	-0.0482906	0.390139
cg16062877	-0.0882717	0.00626293	-0.0518372	0.187366		-0.0888068	0.00396814	-0.194501	4.81807e-05	0.29454	7.79216e-06
cg16063474	-0.0566065	0.0126716	0.129588	2.96122e-06		-0.0559229	0.0137759	0.107464	0.00343901	0.0448805	0.365553
cg16105594	0.0914977	1.50384e-05	-0.0215773	0.394939		0.0913952	1.54568e-05	-0.0132672	0.696304	-0.0167605	0.714602
cg16149164	-0.0852576	0.0130734	-0.0466024	0.259996		-0.0844377	0.00840833	-0.220199	7.23953e-06	0.370473	5.68973e-08
cg16636692	-0.118761	8.44894e-08	0.174885	1.89436e-11		-0.117385	1.09244e-07	0.205613	2.15356e-10	-0.0719624	0.123573
cg16709512	0.122233	1.63112e-09	-0.0395345	0.0994443		0.122127	1.46101e-09	-0.0220488	0.475341	-0.0395742	0.364591
cg16812288	0.0723804	0.000694864	-0.0488511	0.0509227		0.0718664	0.000711058	-0.0238298	0.456676	-0.0567367	0.210347
cg16830479	0.19458	7.40697e-13	-0.0957201	0.003184		0.193959	3.50638e-13	-0.0297929	0.471414	-0.142786	0.0131175
cg16851858	-0.0448386	0.00297823	0.0215929	0.233133		-0.0440895	0.00272144	-0.0287627	0.212465	0.103885	0.000982476
cg16906995	0.112785	3.13163e-07	-0.0664636	0.0111986		0.112884	3.04224e-07	-0.0767204	0.0232159	0.0227042	0.63198
cg16922869	-0.0552847	0.0959001	-0.0285047	0.497939		-0.0579571	0.0639118	-0.217857	1.28217e-05	0.364854	6.40136e-08
cg17267720	0.132061	4.63039e-06	-0.0722434	0.0356796		0.131335	4.11287e-06	-0.0162977	0.712588	-0.121024	0.0489258
cg17391741	-0.0734253	0.000348251	-0.0307249	0.215221		-0.0732385	0.000304901	-0.0834851	0.00928095	0.107057	0.0142309
cg17413252	-0.0684697	0.00732157	-0.0250866	0.421636		-0.068498	0.00621967	-0.106394	0.00762725	0.163919	0.00242994
cg17414733	-0.112864	4.73148e-05	0.175425	1.03837e-07		-0.112957	4.56819e-05	0.19473	5.37232e-06	-0.0421287	0.479843
cg17417347	-0.239295	1.55638e-09	0.0544218	0.240958		-0.240326	1.10677e-09	0.0937793	0.145852	-0.0758736	0.370452
cg17512382	0.0712377	6.07589e-05	-0.0615353	0.00310301		0.0712508	5.53791e-05	-0.0422386	0.115792	-0.0433799	0.251935
cg17632028	-0.0649793	0.00126676	-0.022129	0.371261		-0.0650946	0.000790306	-0.108053	0.0004262	0.17505	3.04064e-05
cg17731547	-0.055684	0.0565023	0.0472141	0.188532		-0.0546467	0.0536894	-0.0642779	0.152906	0.225908	0.000222989
cg17917920	0.100088	1.61056e-05	-0.084558	0.00199339		0.1001	1.52601e-05	-0.068647	0.0495916	-0.0364316	0.463896
cg17930737	-0.150664	1.20083e-09	0.190179	2.8808e-11		-0.152154	6.80586e-10	0.16576	2.87612e-06	0.0619191	0.235149
cg17971328	-0.128285	0.000530186	0.0680856	0.136401		-0.127812	0.000456982	-0.0480488	0.413213	0.227319	0.00400165
cg18007641	-0.166437	0.000216674	-0.0251305	0.647148		-0.166651	0.000142713	-0.190721	0.00535096	0.335143	0.000337984
cg18016288	-0.11056	0.0021985	0.0390562	0.365138		-0.108681	0.00167183	-0.100583	0.0569663	0.302586	4.14931e-05
cg18055230	0.0968422	9.09393e-07	0.0425603	0.0708107		0.0969763	8.60648e-07	0.0620876	0.0479481	-0.0392728	0.353487
cg18095109	0.0573466	0.0110964	-0.0260978	0.337548		0.0571359	0.0113566	-0.00339722	0.9256	-0.0452726	0.354796
cg18230367	-0.189461	6.0204e-12	0.16408	1.05761e-07		-0.191243	2.12915e-12	0.126815	0.000838795	0.100009	0.0822087
cg18327772	-0.0435136	0.0875341	0.0326624	0.29318		-0.042522	0.0863982	-0.0613936	0.118524	0.188387	0.000415412
cg18332146	0.0662116	0.00407631	0.00110556	0.968116		0.0662632	0.00402102	-0.00666915	0.857202	0.0158459	0.751852
cg18450625	-0.153234	0.000313426	0.0636876	0.226244		-0.151443	0.00023646	-0.116072	0.0739149	0.354862	5.39856e-05
cg18474718	0.112437	1.85323e-05	-0.181215	4.71779e-09		0.112321	1.89633e-05	-0.190189	1.4268e-06	0.0204917	0.714575
cg18556005	-0.0803003	0.000149247	0.137629	4.19128e-08		-0.0789613	0.000189562	0.163247	2.1422e-07	-0.0586546	0.191815
cg18570553	0.0875008	0.00343967	-0.0290279	0.424912		0.0874481	0.00348043	-0.0178284	0.718889	-0.0217692	0.741069
cg18641329	-0.0909065	0.000982218	0.138589	2.20165e-05		-0.0919013	0.000838259	0.162905	0.000140345	-0.0524662	0.375528
cg18655915	-0.0570649	0.0186502	0.172107	2.4851e-09		-0.0565795	0.019767	0.160236	1.90377e-05	0.0255467	0.622833
cg18731202	-0.141729	0.000114765	0.0737406	0.113847		-0.140815	6.44435e-05	-0.126635	0.0281359	0.365661	1.59731e-06
cg18754985	-0.169407	2.76587e-10	0.0767398	0.0150546		-0.170084	2.06057e-10	0.0994075	0.0189794	-0.0466021	0.417027
cg18801567	-0.0470295	0.0530582	0.0814158	0.00420839		-0.0473981	0.051017	0.0924966	0.0124308	-0.0243538	0.635505
cg18864497	0.0696803	0.00391746	-0.0186069	0.522959		0.0695951	0.00391589	0.0130099	0.736958	-0.0628213	0.227426
cg18874902	0.057848	0.00282677	0.0113106	0.625183		0.0577931	0.00282393	0.0313191	0.305837	-0.0410293	0.324684
cg18968279	-0.118378	6.96079e-06	0.00101354	0.97458		-0.11866	6.275e-06	-0.0424337	0.322845	0.0828078	0.143951
cg18994438	-0.0983029	0.000333242	0.0350941	0.28768		-0.097713	0.000353141	-0.00278268	0.948727	0.0771289	0.188285
cg19104471	0.0898336	0.00162561	-0.0507095	0.14137		0.0902998	0.00149881	-0.0686692	0.144613	0.0355458	0.570673
cg19110795	0.0764929	0.0012874	-0.0175616	0.539096		0.0765054	0.00129027	-0.014761	0.703618	-0.00553926	0.914963
cg19111030	-0.117071	1.24267e-15	0.114156	6.54407e-11		-0.116654	1.28111e-15	0.132846	2.9415e-09	-0.0411736	0.189463
cg19213194	0.158351	7.71015e-08	-0.155716	6.70384e-06		0.156531	1.02534e-07	-0.197712	2.79585e-06	0.100327	0.102802
cg19243391	0.0898764	0.0060389	-0.0542335	0.170074		0.0889697	0.00661384	-0.0218299	0.680202	-0.0640408	0.368055
cg19358594	0.0491023	0.0244395	-0.00202503	0.938292		0.0490948	0.0244722	-0.00160876	0.963201	-0.000852982	0.985619
cg19477192	0.0870871	8.9008e-05	-0.0904872	0.000566546		0.0872805	8.09108e-05	-0.071288	0.0368916	-0.0422718	0.375566
cg19550439	0.147068	1.43919e-12	-0.125354	4.39116e-07		0.146972	1.43093e-12	-0.114557	0.000408398	-0.0231584	0.605647
cg19716125	0.0926011	1.87732e-05	-0.0393333	0.117146		0.0918984	1.79864e-05	-0.00636694	0.842613	-0.0755987	0.0958887
cg19859270	-0.445868	9.34685e-16	-0.255585	0.000615567		-0.49886	8.34654e-23	-0.719875	1.48985e-22	0.80033	9.03796e-16
cg19906093	0.099966	0.000701006	-0.0581201	0.102772		0.0997292	0.000722115	-0.0256182	0.595781	-0.062598	0.329356
cg20755651	0.199178	8.36682e-08	-0.0754454	0.0911283		0.197679	1.06911e-07	-0.0261018	0.665073	-0.0942539	0.238476
cg20891060	0.142338	3.21386e-08	0.0914096	0.00281794		0.140851	2.85721e-08	0.147023	0.000211831	-0.120689	0.0282309
cg21112148	-0.160841	9.41587e-06	0.236886	1.1572e-08		-0.160254	1.08367e-05	0.243534	1.79023e-06	-0.0170005	0.823868
cg21161138	-0.212303	4.85677e-23	0.0405552	0.115962		-0.211899	2.87991e-23	0.000411219	0.990312	0.0818789	0.0745218
cg21192376	-0.142958	1.45278e-07	0.230318	6.73371e-13		-0.14378	1.08138e-07	0.200654	8.82563e-07	0.0676382	0.242932
cg21194937	0.0866127	0.000227009	-0.0522653	0.0680144		0.0863747	0.000238241	-0.0356601	0.356968	-0.0325476	0.52891
cg21249729	-0.101471	2.73706e-05	0.122035	2.31334e-05		-0.101136	2.66742e-05	0.0912757	0.0146188	0.0664915	0.200057
cg21290290	-0.249638	1.88929e-11	0.26222	3.53189e-09		-0.249229	1.93054e-11	0.292612	3.24829e-07	-0.0679274	0.398649
cg21385983	-0.0579007	0.00286054	-0.0222134	0.340286		-0.0576921	0.00289129	-0.0449118	0.141978	0.0473211	0.258323
cg21389924	0.104648	6.60525e-10	-0.0971069	1.37416e-06		0.104625	6.50985e-10	-0.0907476	0.000489143	-0.0139641	0.701469
cg21450008	0.0719532	7.32754e-06	0.00459672	0.810312		0.0717629	6.83673e-06	0.0318512	0.201872	-0.056858	0.0964106
cg21466736	-0.110435	3.7704e-05	-0.0331404	0.308306		-0.110674	2.89393e-05	-0.106994	0.0104686	0.148257	0.00888389
cg21552822	0.0578031	0.00661146	-0.0153974	0.546634		0.0577923	0.0066298	-0.0139172	0.685338	-0.00297951	0.948653
cg21566642	-0.384662	9.84416e-33	-0.0400207	0.296709		-0.384157	8.33664e-33	-0.0679917	0.171373	0.0613166	0.376522
cg21720999	0.10546	5.75575e-07	-0.00355047	0.887174		0.105212	4.38601e-07	0.0344915	0.285952	-0.0847508	0.0603977
cg21763952	0.0795764	0.00119188	0.00687429	0.81604		0.0795725	0.0011968	0.0133354	0.735831	-0.0130813	0.806331
cg21898708	-0.0364317	0.00749847	0.129598	1.08715e-15		-0.0361622	0.00731998	0.157029	3.51852e-14	-0.0594981	0.0389685
cg22001073	0.149197	3.83305e-10	-0.0804825	0.00375199		0.149274	3.26295e-10	-0.061963	0.0796872	-0.0432726	0.393451
cg22094163	-0.127243	0.00211078	0.13438	0.0063072		-0.125605	0.00237152	0.0829906	0.19199	0.109154	0.21358
cg22182287	-0.0912258	3.37158e-05	-0.010235	0.693253		-0.0908577	3.61588e-05	-0.02867	0.392551	0.0397554	0.393419
cg22225065	0.0712585	0.000290383	0.0178764	0.446544		0.0712579	0.000291613	0.0232118	0.459928	-0.01073	0.800666
cg22403154	0.0783977	2.08082e-06	-0.00819118	0.678396		0.0783589	2.09045e-06	-0.00460225	0.858682	-0.00775201	0.828081
cg22496377	0.0603434	0.014212	-0.0154353	0.602342		0.0604031	0.0140934	-0.020232	0.610554	0.00971539	0.856299
cg22530977	-0.0287832	0.112222	0.0546057	0.0134493		-0.0281236	0.116232	0.00924831	0.747137	0.0922542	0.0178062
cg22743003	0.0586619	0.0146041	-0.0213882	0.462645		0.0584391	0.0149894	0.000759978	0.984515	-0.043664	0.405039
cg22851561	-0.176982	1.54909e-06	-0.0665413	0.116275		-0.173223	9.0764e-07	-0.189163	0.000217946	0.290868	8.00648e-05
cg22924269	-0.0161377	0.425874	0.153737	1.98968e-10		-0.0152729	0.448985	0.185388	2.28843e-09	-0.0687035	0.112379
cg22995176	-0.189792	2.20251e-06	0.189834	7.35651e-05		-0.189964	2.08075e-06	0.167708	0.00622308	0.0496735	0.564653
cg23003872	0.092885	9.79009e-07	-0.110621	7.48333e-07		0.0927826	8.96757e-07	-0.0898238	0.00172849	-0.0468135	0.24685
cg23267554	0.209565	9.6978e-11	-0.146032	0.000106892		0.209532	9.90136e-11	-0.157345	0.000849077	0.0272399	0.691288
cg23367119	-0.0740992	1.70451e-08	-0.00950922	0.544132		-0.0738991	1.55835e-08	-0.0302132	0.138947	0.0435456	0.120228
cg23576855	-0.702444	0	-0.0584422	0.356123		-0.702496	0	-0.0688035	0.422425	0.0204161	0.858304
cg23611710	-0.0826462	0.0218281	0.149853	0.00123156		-0.0803278	0.0249853	0.0549225	0.375198	0.176255	0.0298692
cg23674788	-0.038121	0.0591156	-0.000889503	0.971637		-0.0378426	0.0478933	-0.101921	0.000893171	0.202197	1.15408e-06
cg23797200	-0.36144	6.08418e-10	-0.12064	0.081144		-0.360855	6.25858e-10	-0.15877	0.0811797	0.0810932	0.516806
cg23916896	-0.227072	8.38983e-10	-0.124135	0.00390043		-0.224928	9.68487e-10	-0.164099	0.00257332	0.0950564	0.223796
cg23987549	0.0992392	0.00014489	-0.0769878	0.0146958		0.0988185	0.000155411	-0.0572124	0.179375	-0.0385673	0.495269
cg24078767	0.075054	0.0166441	-0.0968265	0.00953703		0.0749202	0.0168096	-0.0869808	0.0740873	-0.0212417	0.753105
cg24186711	-0.0823972	3.11304e-09	0.019497	0.237622		-0.0825125	2.87951e-09	0.0260951	0.230258	-0.0139216	0.640801
cg24291974	-0.107005	5.70941e-07	0.0126089	0.620352		-0.106965	5.76412e-07	0.00921732	0.781722	0.00731105	0.87373
cg24301350	0.13912	7.70542e-12	0.0198859	0.408845		0.139097	7.76684e-12	0.0201159	0.52936	-0.000486006	0.99106
cg24311704	-0.0461691	0.0307087	0.0395837	0.130639		-0.0454638	0.0290273	-0.0352272	0.292179	0.150655	0.000881795
cg24518943	-0.145708	7.68427e-07	0.269049	7.69779e-15		-0.14375	1.11553e-06	0.295397	5.00429e-12	-0.0642257	0.304187
cg24533466	-0.108237	5.90312e-05	0.0773778	0.0164326		-0.106027	7.7472e-05	0.0232102	0.576792	0.110983	0.0506666
cg24671951	-0.0845472	0.000613814	0.0655601	0.0243733		-0.0847817	0.000591231	0.0734593	0.0543322	-0.0169298	0.748563
cg24793014	-0.0784979	0.000284628	0.0598284	0.0263908		-0.0777689	0.000290052	0.00933639	0.791111	0.10074	0.0339282
cg24804436	-0.0358754	0.140003	0.00954868	0.752257		-0.0359356	0.130687	-0.0773691	0.0443079	0.17209	0.000908414
cg25223391	0.0689492	0.000162989	-0.104569	1.30156e-06		0.0689792	0.000145062	-0.0782164	0.0048879	-0.0585549	0.13336
cg25354716	0.260054	3.53953e-13	-0.15203	0.000421535		0.259125	1.07604e-13	-0.0444813	0.412074	-0.230665	0.00222643
cg25362525	0.0469254	3.96744e-08	-0.0534911	1.40406e-07		0.0469838	3.7377e-08	-0.0581372	1.18379e-05	0.00998496	0.586483
cg25648203	-0.175126	1.91055e-13	-0.0879262	0.00162719		-0.175075	1.85281e-13	-0.0791623	0.0319141	-0.018366	0.715692
cg25677394	-0.0742916	0.00143193	0.0711337	0.0105504		-0.0733627	0.00162415	0.0424225	0.240761	0.0602809	0.22538
cg25808839	0.13054	1.23465e-10	-0.0702505	0.00424896		0.130182	1.44835e-10	-0.059056	0.0761438	-0.0219999	0.621182
cg25882591	0.262016	1.28905e-26	0.0241921	0.406679		0.261105	1.34743e-27	0.0837189	0.0253074	-0.135527	0.0102937
cg26057840	-0.113087	0.000174529	0.0583764	0.110482		-0.11095	0.000167257	-0.0435555	0.346882	0.205839	0.00107072
cg26182263	0.061233	0.00115502	0.0478532	0.0340312		0.0613614	0.0011081	0.0675747	0.0231376	-0.0407305	0.315411
cg26195710	-0.0961705	0.00021675	0.0289197	0.347351		-0.0953413	0.00024421	0.00159045	0.967813	0.0593175	0.27879
cg26270695	-0.112328	0.00162607	-0.0604816	0.176339		-0.115792	0.000723272	-0.230549	1.95262e-05	0.334863	4.98877e-06
cg26309498	0.357956	2.8298e-16	-0.206405	8.47416e-05		0.358102	1.55843e-16	-0.137296	0.0396162	-0.153798	0.102115
cg26311995	-0.0935573	0.00195652	0.0447768	0.217382		-0.0928313	0.00203702	-0.00266032	0.955021	0.0989167	0.125693
cg26381918	-0.13792	4.97951e-05	0.257911	5.84462e-11		-0.138371	4.78617e-05	0.2512	3.14249e-07	0.0164663	0.81832
cg26456259	-0.0623516	0.0104005	0.0815408	0.00586501		-0.0606609	0.0106847	-0.000856086	0.98186	0.167133	0.00109348
cg26546646	0.102996	2.81656e-05	-0.00692008	0.81436		0.102935	2.86457e-05	0.0026501	0.946492	-0.019239	0.717418
cg26573518	0.0663104	0.00207489	0.00202563	0.937624		0.0662799	0.00209243	0.00930257	0.788878	-0.0145891	0.755213
cg26607002	0.104359	8.68862e-08	-0.0434359	0.0587428		0.103709	7.36682e-08	-0.0060237	0.838561	-0.0821669	0.046534
cg26674132	-0.0990319	1.46926e-05	0.113996	2.23188e-05		-0.0991216	1.13565e-05	0.0725828	0.0340049	0.0934862	0.0528127
cg26687746	0.111863	2.53447e-07	-0.0828669	0.00136141		0.111734	2.58699e-07	-0.0736257	0.0294697	-0.0198084	0.671828
cg26703534	-0.187103	8.18154e-15	0.0143566	0.609903		-0.187873	3.27615e-15	0.0578084	0.114222	-0.0937114	0.0640625
cg27097575	-0.0501517	0.0110199	0.0211163	0.375051		-0.0494278	0.0108338	-0.0346755	0.2528	0.116175	0.00528423
cg27356115	-0.170982	6.92817e-05	-0.0925097	0.0670549		-0.168171	3.19984e-05	-0.280339	4.66582e-06	0.418525	1.10199e-06
cg27521571	-0.20973	2.30991e-07	-0.0656345	0.160761		-0.209365	2.41182e-07	-0.102161	0.091203	0.0778359	0.350305
cg27528104	-0.121232	0.0014201	0.0580486	0.199846		-0.119736	0.0016101	0.00280893	0.961713	0.114252	0.153015
cg27573593	0.108087	0.00011303	-0.0520755	0.106495		0.107792	9.77053e-05	-0.0118583	0.771677	-0.097532	0.0995726
cg27607583	0.0906659	0.000997315	0.01317	0.688522		0.0906481	0.00100458	0.0185236	0.671543	-0.0110272	0.852291
cg27622633	0.09726	0.000326224	-0.0274799	0.40047		0.0969665	0.000342754	-0.006967	0.873917	-0.0407174	0.490282
cg27649653	-0.108141	1.28052e-07	0.140462	5.48099e-09		-0.108375	1.11721e-07	0.124787	5.04597e-05	0.0356359	0.412968
cg00124488	0.0389053	0.0409401	-0.0214934	0.347951		0.0386939	0.0418737	-0.00569491	0.850507	-0.0327603	0.427085
cg00282216	0.0221	0.105052	-0.085039	1.48163e-07		0.0219699	0.106131	-0.0719475	0.000622855	-0.0283759	0.331177
cg00421612	-0.0680647	0.038232	0.0261726	0.517381		-0.0665705	0.0383846	-0.0805905	0.114144	0.219293	0.00169352
cg00486022	-0.035762	0.100475	0.0979092	0.000287321		-0.0340944	0.110036	0.0246813	0.479596	0.144466	0.00210889
cg00498419	-0.0726592	0.0147664	0.164142	4.01355e-06		-0.0713897	0.0166299	0.1936	1.70471e-05	-0.0661772	0.297333
cg00608779	-0.0640522	0.0384736	0.0260101	0.50286		-0.064079	0.0309419	-0.118142	0.013391	0.28413	1.11772e-05
cg00712792	0.0442059	0.00977359	-0.0439694	0.0293278		0.044099	0.00948653	-0.0231275	0.380123	-0.0456393	0.214078
cg00828709	-0.123219	0.000528682	0.129501	0.00287174		-0.122586	0.00057529	0.111283	0.0582907	0.035655	0.648569
cg00831247	-0.0540665	0.0264475	-0.164579	3.88068e-08		-0.0579925	0.011519	-0.292492	5.89471e-16	0.255234	2.11524e-07
cg00911962	-0.111338	0.0313083	-0.0673343	0.29251		-0.117286	0.0211119	-0.243554	0.00208851	0.35129	0.00110998
cg00950473	-0.0803816	0.00845882	0.151583	3.35284e-05		-0.0806999	0.00819721	0.161344	0.000817341	-0.0205232	0.75593
cg01094121	-0.134255	0.000437258	0.231862	3.00473e-07		-0.134556	0.000429242	0.226181	8.92889e-05	0.0129894	0.873817
cg01111842	-0.125348	1.89232e-07	0.186837	7.51828e-11		-0.122023	3.09506e-07	0.23935	1.02218e-11	-0.121426	0.0165747
cg01249134	0.155294	2.91422e-10	-0.120228	5.93493e-05		0.154132	2.84387e-10	-0.0691088	0.0796486	-0.102657	0.0540359
cg01323766	0.0455646	0.0486837	-0.0717119	0.00851093		0.0456175	0.0471942	-0.0472371	0.179723	-0.05484	0.267972
cg01341751	0.100929	0.000104058	-0.12881	3.39545e-05		0.098875	0.000130094	-0.182153	2.40661e-06	0.118307	0.0308616
cg01405684	0.0640011	0.00203379	-0.0225558	0.34976		0.0633431	0.00200857	0.010509	0.733032	-0.076768	0.0803046
cg01418536	0.145585	6.30986e-07	-0.0558646	0.100807		0.145236	5.33941e-07	-0.0165686	0.700856	-0.0930428	0.13385
cg01442959	-0.0676722	0.0125853	0.178134	2.43873e-08		-0.0680534	0.0120862	0.169944	3.27542e-05	0.0188105	0.747381
cg01604210	-0.0302633	0.0383337	0.0620775	0.000395015		-0.0292943	0.0437138	0.0360402	0.109493	0.0558991	0.0738992
cg01720945	0.0995749	3.78912e-06	-0.0545194	0.0348573		0.0991583	3.26245e-06	-0.106703	0.000963688	0.111997	0.0130306
cg01731783	-0.0953656	4.38868e-05	0.0785081	0.00498385		-0.0951824	4.49032e-05	0.0657511	0.0736486	0.0269683	0.592755
cg01746532	-0.118399	0.000320698	0.286795	9.73804e-14		-0.115699	0.000456792	0.315789	2.73435e-11	-0.0709602	0.309877
cg01810416	-0.104356	3.26388e-05	0.00978432	0.743579		-0.103751	3.47157e-05	-0.0270679	0.479886	0.0781308	0.1383
cg01810593	-0.069908	0.0281833	0.165691	1.21917e-05		-0.0689494	0.0303422	0.137911	0.00532195	0.0586977	0.389121
cg02264922	0.0944119	0.000347742	-0.0128514	0.68337		0.0944254	0.00034541	-0.0166128	0.697026	0.007493	0.895825
cg02322048	0.10005	0.000100154	-0.0829954	0.00500654		0.100162	9.53298e-05	-0.0711724	0.0564573	-0.0283871	0.599764
cg02351018	0.0680568	0.00130453	-0.0431806	0.0863924		0.0679181	0.00129211	-0.0262921	0.419664	-0.0373692	0.41192
cg02406531	0.276001	1.38603e-05	-0.326924	3.9271e-05		0.275891	1.39437e-05	-0.309246	0.00391172	-0.0350674	0.807392
cg02693345	0.0879481	4.47513e-05	-0.102487	4.60224e-05		0.0879752	4.49771e-05	-0.101803	0.00142673	-0.00158999	0.972215
cg02724903	0.0663733	7.72247e-05	-0.00256028	0.897023		0.065902	7.61992e-05	0.021016	0.407652	-0.0533855	0.135407
cg02776750	-0.0797253	0.00259501	0.0170142	0.602481		-0.0795845	0.0023791	-0.0560573	0.192402	0.140796	0.0141743
cg02788938	-0.19523	7.2338e-05	0.298307	3.40998e-07		-0.194003	7.73765e-05	0.355638	2.33004e-06	-0.128773	0.22398
cg02882813	-0.0890935	0.000237902	0.0129177	0.662884		-0.0889433	0.000218926	-0.0405776	0.300748	0.104849	0.045717
cg02917246	-0.0868709	0.000214251	0.118501	2.05034e-05		-0.0867489	0.000219225	0.12656	0.000407806	-0.0179174	0.72145
cg03027241	-0.194743	3.34008e-06	-0.0783738	0.11639		-0.193651	3.1427e-06	-0.150513	0.0215876	0.153668	0.0879815
cg03038850	-0.0590174	0.010286	-0.0523428	0.0622402		-0.0600049	0.00480045	-0.183959	1.9746e-08	0.270292	2.5506e-09
cg03065888	0.217902	2.53047e-07	-0.158446	0.00157629		0.21788	1.86711e-07	-0.086154	0.171907	-0.165224	0.0656241
cg03168749	-0.0538627	0.0248199	0.0289944	0.330476		-0.0532607	0.0197791	-0.0880003	0.0158273	0.233547	2.37867e-06
cg03244189	0.166863	5.72604e-05	-0.275986	1.60016e-07		0.170276	4.47295e-05	-0.311589	8.00553e-05	0.0609087	0.541971
cg03421069	0.069908	0.00188756	-0.0297823	0.266484		0.0698208	0.0019109	-0.0247804	0.481267	-0.0106214	0.826376
cg03502236	-0.0792095	0.000338967	-0.0490152	0.0655993		-0.0793112	0.000238898	-0.120552	0.000362398	0.147914	0.00138098
cg03508409	-0.131599	8.44538e-07	0.217172	2.92304e-12		-0.130177	1.14968e-06	0.237858	8.08815e-10	-0.0494907	0.379206
cg03525818	-0.104841	0.000226514	0.124851	0.000225033		-0.104476	0.000241689	0.115026	0.00942789	0.0207599	0.732574
cg03562528	-0.103541	3.22427e-05	-0.0405487	0.177436		-0.103885	2.48145e-05	-0.101809	0.0091364	0.123724	0.0195678
cg03651715	-0.064824	0.0424085	-0.0628803	0.0967696		-0.0633092	0.0365184	-0.197861	1.50196e-05	0.295972	3.89304e-06
cg03761477	0.038516	0.0332725	-0.0140918	0.518519		0.0382084	0.0315634	0.0365128	0.189878	-0.106118	0.0055829
cg03792491	-0.0574508	0.00555352	0.0128596	0.599848		-0.057095	0.00578288	-0.0105376	0.742123	0.0487226	0.265422
cg03881711	0.132994	9.9401e-06	-0.123598	0.000437781		0.132553	1.03067e-05	-0.157208	0.000335483	0.0789801	0.211959
cg03991106	0.0688274	0.000643731	-0.0608098	0.00904328		0.0688081	0.000627198	-0.0492715	0.0946027	-0.0274008	0.518408
cg04167725	0.150471	3.60677e-08	-0.135805	1.86103e-05		0.150482	3.61591e-08	-0.135308	0.000674211	-0.00119179	0.983505
cg04195702	-0.0528812	0.0189825	0.0322357	0.23339		-0.0520438	0.020254	-0.0101596	0.773562	0.0863515	0.0715667
cg04294388	-0.0320293	0.257985	0.00532914	0.880653		-0.0322733	0.229932	-0.138938	0.00127027	0.285302	1.09266e-06
cg04425458	0.0694958	0.000593556	0.00555736	0.819334		0.0694547	0.000597218	0.0207925	0.523277	-0.0305512	0.486536
cg04433306	-0.102064	5.15051e-06	0.137968	9.97629e-08		-0.102955	3.76784e-06	0.113842	0.00052007	0.056935	0.225825
cg04573872	-0.0967322	4.99954e-05	-0.0245403	0.383569		-0.0966102	5.10007e-05	-0.0395129	0.283434	0.0315509	0.531857
cg04607032	-0.17292	1.1839e-06	-0.116204	0.00517093		-0.173974	8.9163e-07	-0.186001	0.000394343	0.14827	0.0417737
cg04636881	0.0522737	0.142824	-0.0839863	0.0438567		0.0523865	0.140036	-0.0536796	0.319144	-0.0687471	0.366385
cg04715525	-0.0871716	5.5154e-07	0.102105	7.12344e-07		-0.0873454	5.12622e-07	0.0954878	0.000348192	0.0146366	0.696596
cg04717613	-0.162565	0.000380311	0.203423	0.000192565		-0.163676	0.0003332	0.244728	0.000784983	-0.085492	0.387319
cg04729173	-0.0340425	0.176511	0.024275	0.431202		-0.0335074	0.1773	-0.0457945	0.251405	0.140238	0.00934397
cg04758185	0.0605255	0.00511324	-0.0489553	0.0516132		0.0605433	0.00504122	-0.0406913	0.207333	-0.0188485	0.680652
cg04792227	0.10224	0.0277346	-0.050803	0.380098		0.100427	0.0297368	0.0567203	0.453884	-0.209478	0.040127
cg04880611	-0.0364264	0.187753	-0.0328265	0.350379		-0.0391857	0.130837	-0.195011	3.04229e-06	0.312809	2.68401e-08
cg04995826	0.0710007	0.00133944	0.0623482	0.0184774		0.0710325	0.00133315	0.0627785	0.0756248	-0.000890983	0.985156
cg05112617	0.065177	0.00175078	-0.00308948	0.901783		0.0651099	0.00172627	0.0237518	0.472349	-0.0548167	0.222055
cg05153748	0.0821096	0.00022825	-0.00357229	0.89122		0.0811607	0.000222031	0.0349549	0.299897	-0.0871253	0.0652171
cg05274755	0.117077	8.38852e-07	-0.00847899	0.765269		0.117048	8.45835e-07	0.00665066	0.860686	-0.0304957	0.550336
cg05287481	-0.0932883	1.96849e-05	0.0995599	0.000129884		-0.092582	2.24077e-05	0.0787281	0.0215533	0.0432915	0.355633
cg05377515	0.0430768	0.00268874	-0.0724232	2.26568e-05		0.0428599	0.00273333	-0.0564303	0.0112778	-0.0343002	0.265384
cg05388492	0.159665	5.91403e-07	-0.00225711	0.952185		0.158871	5.95466e-07	0.0563455	0.237367	-0.124777	0.0588605
cg05435065	-0.0762747	0.000210059	0.187729	1.18598e-14		-0.0731845	0.000329526	0.234595	4.73648e-15	-0.106397	0.0134298
cg05586134	0.137695	2.54262e-05	-0.0639948	0.0860204		0.137807	2.36149e-05	-0.0457107	0.324847	-0.0460986	0.501869
cg05740739	-0.128961	4.1723e-05	-0.0226126	0.550624		-0.129233	2.29481e-05	-0.142315	0.00246557	0.245758	0.000137234
cg05832051	-0.0584619	0.0173111	0.207	4.91617e-13		-0.0589519	0.0163404	0.195851	1.02556e-07	0.025144	0.628105
cg05905475	0.115523	0.000108313	-0.0677221	0.0454777		0.114839	8.38994e-05	-0.00777312	0.854803	-0.148913	0.0163336
cg05938628	-0.155055	3.14293e-07	0.150277	2.61712e-05		-0.15524	2.94989e-07	0.136419	0.00289419	0.0313493	0.628003
cg06056514	0.0521551	0.0059915	-0.0317412	0.149586		0.0518757	0.00543687	0.00584136	0.835665	-0.0866062	0.0298636
cg06058681	0.0829091	0.000428383	-0.0229947	0.418771		0.0828608	0.000432445	-0.00874552	0.817472	-0.0288736	0.572752
cg06213807	0.0379161	0.00344091	-0.0613393	6.90256e-05		0.0379066	0.00345227	-0.0603282	0.00273843	-0.0021475	0.93859
cg06249109	-0.0501111	9.68037e-06	0.0114321	0.395447		-0.0499292	9.9042e-06	0.000894896	0.959303	0.0226809	0.349968
cg06381350	-0.0855568	0.00707371	0.0720847	0.0659364		-0.0846621	0.00698704	-0.015	0.768003	0.171616	0.0119237
cg06431105	0.0831668	0.000701929	-0.052265	0.0649014		0.0829077	0.000537093	0.00599253	0.868971	-0.133717	0.00904786
cg06557376	0.0751061	0.0044006	-0.0209686	0.489392		0.074258	0.00417087	0.0299167	0.443994	-0.116866	0.0343896
cg06648782	-0.0746695	0.00214667	-0.0265493	0.376995		-0.076038	0.000928778	-0.159726	1.30724e-05	0.256321	1.94277e-07
cg06872036	-0.0639282	0.010581	0.129699	1.23258e-05		-0.0650558	0.00897511	0.159164	5.7495e-05	-0.0612892	0.255226
cg06897120	0.265699	6.72076e-06	-0.284204	3.04587e-05		0.264889	7.45578e-06	-0.298159	0.000439073	0.0340878	0.78346
cg06936402	-0.0908958	6.12554e-05	0.036291	0.179917		-0.0902047	6.45546e-05	-0.00195963	0.95531	0.0803762	0.0947223
cg06968752	-0.1002	1.73164e-06	0.103267	3.69461e-05		-0.100629	1.51481e-06	0.11715	0.000473409	-0.0283916	0.531367
cg07078532	0.0640794	0.00216614	0.00428501	0.863281		0.0641767	0.00202045	-0.0193216	0.56335	0.0483353	0.285232
cg07156182	-0.100175	0.00105681	0.269047	7.58766e-14		-0.099488	0.00119093	0.277221	1.43391e-09	-0.0186536	0.774545
cg07387813	-0.117435	3.22287e-05	0.189343	1.91279e-08		-0.114322	4.33186e-05	0.254681	1.04587e-09	-0.146904	0.0134716
cg07437919	-0.21663	1.00253e-06	-0.109888	0.0406809		-0.216179	1.01513e-06	-0.137878	0.0544881	0.0579741	0.551695
cg07468782	-0.085681	4.92439e-05	-0.0503469	0.0467931		-0.0855305	3.09677e-05	-0.121981	0.000139172	0.149727	0.000665555
cg07675184	0.0661076	0.000489051	-0.0509006	0.025645		0.0657452	0.000511754	-0.027175	0.366248	-0.0485286	0.23491
cg07842327	0.164128	3.70074e-05	0.0327513	0.471299		0.160843	3.43754e-05	0.11525	0.0466976	-0.200095	0.0156395
cg07867325	0.128351	1.59448e-09	-0.107173	2.53364e-05		0.128308	1.62352e-09	-0.104776	0.00177314	-0.00505565	0.912552
cg07991479	0.0970592	0.000128568	-0.145669	2.25758e-07		0.0973204	0.000118265	-0.132284	0.000122949	-0.0355842	0.494728
cg08076532	0.0457272	0.00776535	-0.104438	2.66892e-07		0.0457075	0.00775821	-0.098603	0.000171393	-0.0129069	0.725784
cg08128444	0.179339	3.81011e-11	-0.0641032	0.0495291		0.178131	1.4888e-11	0.0256586	0.535316	-0.187828	0.000951635
cg08257600	-0.186804	1.72819e-06	-0.0697256	0.125901		-0.186353	1.78952e-06	-0.105584	0.0719678	0.0784666	0.337131
cg08402107	0.174438	4.47917e-19	0.0639399	0.00565137		0.174527	3.19847e-19	0.0922282	0.00225243	-0.0588581	0.154694
cg08556938	0.104061	2.32035e-06	-0.136339	8.00149e-08		0.104018	2.35626e-06	-0.144729	5.22885e-06	0.0202531	0.662469
cg08583001	0.0866104	5.37139e-06	-0.0156051	0.499433		0.086326	5.71665e-06	0.00331064	0.914427	-0.0378673	0.360522
cg08676730	-0.168926	6.33211e-07	0.265932	1.04341e-11		-0.170038	5.47086e-07	0.252782	1.88071e-07	0.0328973	0.644866
cg08681117	-0.0475977	0.00604642	0.00228055	0.913073		-0.0473305	0.00613958	-0.0234306	0.392606	0.0530719	0.155777
cg08708209	0.0859335	0.00152471	-0.0238415	0.465331		0.0860406	0.00146832	-0.0404832	0.361494	0.03313	0.576142
cg08826460	0.0598962	0.0569863	-0.0929678	0.0150669		0.0595901	0.0585262	-0.0811506	0.115684	-0.0234138	0.734618
cg08888410	0.0790315	0.000270122	-0.114594	6.60261e-06		0.079495	0.000228333	-0.0920685	0.00447025	-0.0532537	0.252588
cg08914271	-0.0552437	0.00042295	0.000109668	0.995316		-0.054435	0.000344302	-0.0526585	0.0254449	0.112378	0.000561058
cg09043104	-0.0914206	0.0020251	-0.115057	0.00171824		-0.09621	0.000531978	-0.27736	1.57448e-10	0.325553	3.98135e-08
cg09106556	-0.14021	3.35843e-07	0.249167	5.78555e-15		-0.137178	5.79252e-07	0.287097	1.38698e-13	-0.0933286	0.103449
cg09145256	0.0506913	0.0102553	-0.0595989	0.0118048		0.0507216	0.0102151	-0.0612229	0.0503903	0.00339108	0.936701
cg09166536	-0.111078	0.0048712	-0.00505357	0.91262		-0.109693	0.00509058	-0.0850778	0.146179	0.172317	0.0349214
cg09180820	-0.0577359	0.00121011	-0.041967	0.0517445		-0.0575709	0.00107908	-0.086282	0.00205002	0.0908413	0.0172132
cg09249637	-0.106089	1.43617e-14	-0.0433669	0.00824262		-0.106003	1.40709e-14	-0.0539584	0.0121445	0.02246	0.448447
cg09333325	-0.0445005	0.0440601	-0.0438128	0.114836		-0.0454346	0.0353998	-0.127317	0.000391501	0.159909	0.00081133
cg09387992	0.0432245	0.00105176	-0.0688652	1.0997e-05		0.0432605	0.00104043	-0.0730418	0.000338823	0.00900788	0.750393
cg09542690	0.0585937	0.00601422	0.0522287	0.0411066		0.058805	0.00573838	0.0776098	0.0208706	-0.0525577	0.252275
cg09580249	-0.0418489	0.0132929	0.0481946	0.0194455		-0.0407558	0.0138922	-0.00503155	0.849373	0.108059	0.00270064
cg09583024	0.0731896	0.0209091	-0.0551796	0.126951		0.0728373	0.0198964	-0.0100726	0.824717	-0.112058	0.0910374
cg09843155	0.245816	8.26818e-08	-0.162438	0.00389211		0.245702	8.42003e-08	-0.153903	0.0433322	-0.0168608	0.868464
cg09916030	-0.0191533	0.329769	0.111475	2.03761e-06		-0.0190046	0.333928	0.107151	0.000525488	0.00907358	0.83011
cg09985739	-0.228182	1.23923e-07	-0.095152	0.0578787		-0.228262	1.22781e-07	-0.133067	0.0427399	0.0788676	0.37957
cg10192196	0.0735464	8.48739e-05	-0.0320109	0.153229		0.0736764	8.16636e-05	-0.0393516	0.186457	0.0152279	0.707428
cg10502231	0.107795	6.42736e-05	-0.19323	4.07015e-09		0.108136	6.01923e-05	-0.206401	3.77968e-06	0.0261011	0.660764
cg10502232	0.149237	2.37539e-11	-0.0381089	0.158458		0.148951	2.64367e-11	-0.0178055	0.632394	-0.0381926	0.434351
cg10583473	-0.0400323	0.063147	0.00319746	0.903042		-0.0399354	0.061844	-0.0428143	0.215177	0.0917303	0.0487501
cg10703101	-0.0455794	0.0151632	0.0572077	0.0100669		-0.0450598	0.0163349	0.0422005	0.143131	0.0322409	0.419517
cg10858195	0.0537101	0.00153411	-0.102816	3.05843e-07		0.0536132	0.00153037	-0.0896025	0.000575077	-0.0288953	0.425751
cg10888878	-0.0157582	0.408656	-0.0325664	0.158067		-0.0158942	0.386981	-0.109205	0.000144013	0.158453	5.96315e-05
cg11253957	0.0480532	0.00994019	-0.0614222	0.00381286		0.0476417	0.00844338	-0.0125585	0.637375	-0.116224	0.00234733
cg11343534	0.0908211	2.18582e-06	-0.00629498	0.785673		0.090862	2.113e-06	-0.01358	0.666938	0.0143339	0.732947
cg11692477	0.0839203	0.00161949	-0.0165378	0.622692		0.0842974	0.00127414	0.0800074	0.0665687	-0.182619	0.00161463
cg11779204	-0.0436365	0.0677402	0.0369623	0.212769		-0.042504	0.0607031	-0.0819344	0.0233954	0.238974	1.19499e-06
cg11870561	-0.0657139	0.0186266	-0.0353252	0.313348		-0.0668719	0.0136698	-0.152387	0.000613213	0.224452	0.000159115
cg12058781	-0.0664928	2.89603e-05	0.0693357	0.000246445		-0.0665033	2.88869e-05	0.0725203	0.00323424	-0.00686314	0.840841
cg12075928	-0.144528	9.85435e-05	0.0909111	0.0377417		-0.144019	9.99666e-05	0.0597132	0.287858	0.0694701	0.379202
cg12090052	0.161986	2.0065e-07	-0.0719467	0.0422767		0.161784	1.62277e-07	-0.0370268	0.409067	-0.0854406	0.190608
cg12145289	0.0593851	0.0010924	-0.0566803	0.00678132		0.0592358	0.00106	-0.0387037	0.147376	-0.0419614	0.272727
cg12340381	0.057771	3.89214e-06	-0.0819713	3.6092e-08		0.0577556	3.91426e-06	-0.0804613	3.41009e-05	-0.00325775	0.903637
cg12584590	-0.0471468	0.0152351	0.0482263	0.040033		-0.0459341	0.0157808	-0.0125174	0.674745	0.125358	0.00211725
cg12617538	0.0699256	5.5474e-06	-0.0146883	0.423313		0.0699573	5.49736e-06	-0.0168145	0.484977	0.00452034	0.891538
cg12742432	0.112891	5.1588e-06	-0.0648094	0.0244025		0.113303	2.80698e-06	-0.00668792	0.854006	-0.136869	0.00828013
cg12867237	0.0831264	0.00195458	-0.0285142	0.377819		0.0831685	0.00193869	-0.0315006	0.470475	0.0059642	0.918757
cg12920393	-0.140152	6.30518e-07	0.21396	2.97497e-11		-0.140403	6.15063e-07	0.20971	1.63778e-07	0.0105396	0.858135
cg12989650	-0.0679416	0.0101432	-0.0185002	0.567379		-0.0680913	0.0091202	-0.0890625	0.0312811	0.144111	0.0106661
cg13412452	-0.0822508	0.000118555	0.122042	1.47069e-06		-0.0820045	0.000116452	0.151033	3.19389e-06	-0.0644666	0.157059
cg13750180	-0.167723	1.8575e-05	0.187769	5.60795e-05		-0.163396	3.01094e-05	0.251832	8.93726e-06	-0.149224	0.0691297
cg13958324	-0.0894044	0.00187362	0.105364	0.00215162		-0.0894601	0.00187752	0.106664	0.0186426	-0.00270321	0.965055
cg14056470	0.0290897	0.152749	-0.039074	0.0952659		0.0288098	0.152505	-0.00860725	0.777262	-0.0678761	0.111016
cg14170437	-0.0355634	0.00388442	0.0559587	0.000127692		-0.0361832	0.00268866	0.089554	1.70992e-06	-0.0723575	0.00520518
cg14191885	-0.0679024	0.0431431	-0.0119446	0.776041		-0.068991	0.0292303	-0.193546	0.000111061	0.358128	1.44831e-07
cg14242958	0.0949972	0.000630679	-0.0144433	0.663561		0.0950246	0.000632936	0.00303456	0.945635	-0.0347989	0.560164
cg14257543	-0.0259328	0.0193924	0.00974519	0.46092		-0.0256893	0.0199972	-0.00506867	0.768406	0.0316436	0.183118
cg14303616	-0.0140368	0.407338	0.0357939	0.0838758		-0.0129028	0.41828	-0.0493637	0.050007	0.174935	3.9041e-07
cg14313916	0.0816511	2.71367e-06	-0.0299511	0.142922		0.0811753	2.3902e-06	0.00160066	0.951388	-0.0700921	0.0567121
cg14404146	0.133558	3.64608e-08	-0.162657	9.39218e-09		0.133842	2.99403e-08	-0.140874	8.43542e-05	-0.0513445	0.318132
cg14515381	-0.117932	0.00113729	0.127535	0.00286794		-0.114896	0.00147537	0.0664046	0.219698	0.132084	0.0789331
cg14554244	-0.053909	0.00469047	0.0240893	0.281837		-0.0541536	0.00445533	0.0355615	0.220767	-0.0251163	0.534808
cg14582009	-0.0704241	8.21406e-05	0.0252617	0.230468		-0.0703226	8.47645e-05	0.0210774	0.447092	0.00883041	0.816899
cg14595275	0.115431	7.62077e-07	0.0150974	0.591717		0.115432	7.62154e-07	0.0349257	0.352144	-0.0397465	0.431599
cg14768782	0.060332	0.0126406	-0.00714681	0.805579		0.0603632	0.0125139	-0.0158279	0.687298	0.017353	0.742284
cg14840863	-0.119326	4.946e-07	0.0403347	0.158276		-0.118984	5.24432e-07	0.0211903	0.5754	0.0393714	0.443988
cg14923379	-0.116301	0.0628088	-0.02529	0.729148		-0.114505	0.0674589	-0.0744582	0.424269	0.10814	0.407479
cg14964274	-0.0384828	0.144629	0.135247	1.80205e-05		-0.0377815	0.152592	0.120281	0.00331553	0.0320052	0.570094
cg15267250	-0.0288266	0.21409	-0.0678407	0.0182457		-0.0303593	0.165244	-0.188102	6.25993e-08	0.241774	3.38092e-07
cg15724941	0.069555	5.66056e-05	-0.0814872	6.17007e-05		0.0696015	5.10252e-05	-0.0618789	0.0180021	-0.0439867	0.230906
cg15756928	-0.0828653	0.000177474	-0.0351867	0.187527		-0.0824219	0.000140798	-0.104998	0.0019802	0.143056	0.00203202
cg15777910	0.0505986	0.0417006	-0.00993417	0.735908		0.0504921	0.0419509	-0.00275213	0.942886	-0.0157346	0.769619
cg15888699	0.0613037	0.00896339	-0.0557132	0.0489337		0.0611718	0.00912821	-0.0458966	0.225085	-0.0198186	0.698318
cg15894467	0.0789698	0.000126534	-0.0963033	8.50508e-05		0.078625	0.000124073	-0.0681016	0.0319356	-0.061153	0.165739
cg15959715	0.0630934	0.0303623	-0.0350748	0.327228		0.0629375	0.0308748	-0.0130992	0.788444	-0.0421516	0.512417
cg16098304	-0.0651701	0.0012938	0.0102858	0.67725		-0.0648584	0.00116476	-0.0445411	0.163056	0.111446	0.0102838
cg16168311	-0.125079	3.19494e-09	0.0893366	0.000352242		-0.125075	3.21585e-09	0.0927062	0.0035651	-0.00780888	0.862747
cg16226300	-0.159687	2.46396e-08	0.158567	1.33443e-06		-0.161816	8.52895e-09	0.100943	0.0137318	0.139217	0.0181955
cg16314263	-0.0645443	0.00737434	-0.0373671	0.201993		-0.0647066	0.00495823	-0.143814	5.88612e-05	0.21964	7.72619e-06
cg16361253	-0.0547194	0.00451763	-0.0217486	0.348801		-0.0544974	0.0036607	-0.0876609	0.00294001	0.135841	0.000741886
cg16422343	-0.149805	0.000467153	0.141934	0.00574734		-0.14723	0.000551259	0.065028	0.327056	0.160195	0.0786889
cg16475705	0.0802028	0.00116657	-0.0659916	0.0306419		0.0795246	0.00123251	-0.0167658	0.680946	-0.0945471	0.0802953
cg16582889	-0.0530397	0.0370284	-0.00733204	0.809082		-0.0529975	0.0372246	-0.0128171	0.750602	0.0113128	0.836806
cg16602460	-0.0713128	0.00508859	0.0269929	0.363986		-0.0715739	0.00489126	0.0378866	0.325898	-0.0238926	0.656139
cg16608652	-0.114465	2.90934e-05	0.065889	0.0381887		-0.115782	1.93497e-05	0.110347	0.00818378	-0.0958323	0.09528
cg16608731	-0.0659626	0.00939937	0.0672494	0.0302952		-0.0642339	0.0100698	-0.00976387	0.803594	0.158698	0.00310404
cg16650002	0.0885939	1.7103e-08	-0.0653317	0.000391536		0.0885315	1.33649e-08	-0.0422468	0.0734657	-0.0521147	0.117598
cg16727862	0.0608202	0.0158586	0.000590105	0.984373		0.0608937	0.0155442	-0.0134705	0.739749	0.0285334	0.60186
cg16775460	-0.0480938	0.0338968	-0.0327387	0.246238		-0.048775	0.028858	-0.103009	0.00460428	0.139772	0.00446504
cg17054485	0.0780933	0.00837029	-0.083752	0.0123693		0.0796098	0.00677445	-0.0506106	0.224044	-0.0839644	0.171523
cg17063731	0.045739	0.00689799	-0.00486751	0.809017		0.0457492	0.00689074	-0.00644165	0.80713	0.00332562	0.927233
cg17114402	-0.0456382	0.017385	0.144975	1.28475e-10		-0.0463037	0.0151756	0.12042	3.66083e-05	0.0542807	0.182275
cg17451760	-0.0730038	0.00105005	0.0103598	0.69657		-0.0727836	0.00107435	-0.00739056	0.831862	0.0375257	0.433365
cg17456644	-0.0406353	0.0134534	0.0706782	0.000289262		-0.0400557	0.0146436	0.0520432	0.0388926	0.0401792	0.251113
cg17657594	-0.152859	9.00295e-05	0.380397	3.36232e-17		-0.148993	0.000146248	0.411352	4.62659e-14	-0.0805454	0.327333
cg18040892	0.104221	5.72357e-08	-0.013817	0.534934		0.103035	2.81085e-08	0.0408636	0.142033	-0.130649	0.00107136
cg18115235	-0.0820501	0.0288053	0.0122353	0.790853		-0.0816052	0.0237755	-0.147389	0.00922345	0.324102	2.91489e-05
cg18123072	-0.123756	0.000138508	-0.0189444	0.621127		-0.123378	0.000145514	-0.0416444	0.403314	0.0483435	0.481342
cg18148726	-0.168319	2.44869e-11	0.1247	3.55953e-05		-0.168146	2.72426e-11	0.120565	0.00337346	0.00806338	0.88267
cg18233942	0.103131	4.9845e-09	-0.0200959	0.340988		0.103174	4.80186e-09	-0.0251321	0.379953	0.0100088	0.793862
cg18260823	0.105976	7.41606e-07	-0.0446484	0.0778172		0.10591	6.82638e-07	-0.0258047	0.4268	-0.0429505	0.350251
cg18334819	-0.0546603	0.0353802	0.0812694	0.0113498		-0.0537258	0.0370825	0.019155	0.651297	0.120814	0.0324688
cg18396789	-0.0538401	0.183019	0.0135208	0.793793		-0.0554456	0.154605	-0.183917	0.00333078	0.378859	7.81772e-06
cg18504937	-0.110882	4.98827e-05	-0.0197965	0.543655		-0.110232	4.24049e-05	-0.0901219	0.0305566	0.148095	0.00977653
cg18575346	0.111161	4.63178e-07	-0.0208895	0.411592		0.110252	2.9374e-07	0.0294842	0.354796	-0.122312	0.00748843
cg18715665	0.0768381	0.000422479	-0.0924458	0.000187775		0.0772203	0.00016474	-0.0111563	0.714065	-0.196517	6.98712e-06
cg18865733	0.179781	2.75843e-08	-0.154796	6.88093e-05		0.179728	2.78995e-08	-0.150876	0.0032151	-0.00826596	0.906424
cg18985133	-0.0207	0.315459	-0.0338523	0.184755		-0.0218087	0.265626	-0.137179	1.34433e-05	0.203036	1.75832e-06
cg18998938	-0.142559	2.24361e-05	0.227391	1.04341e-08		-0.141454	1.77018e-05	0.319152	1.95547e-10	-0.205098	0.00360248
cg19017254	-0.0471012	0.0483861	0.0110952	0.703587		-0.0464749	0.0490359	-0.0501168	0.182501	0.123746	0.0153576
cg19023320	-0.0223759	0.181228	0.0160717	0.425153		-0.0216146	0.184406	-0.0405487	0.109296	0.119073	0.000641253
cg19062112	0.0617865	0.0418788	-0.0330175	0.367868		0.0617185	0.0422422	-0.0227102	0.645071	-0.0205533	0.756131
cg19069039	-0.0301835	0.183145	-0.000731436	0.979385		-0.0305466	0.151294	-0.126078	0.000218545	0.247587	8.36559e-08
cg19117365	0.142907	8.06375e-05	-0.00200487	0.962644		0.142978	7.67852e-05	-0.0208808	0.718601	0.0381283	0.624489
cg19157327	-0.0595934	0.0011186	0.015331	0.477426		-0.059606	0.00111806	0.0162213	0.564954	-0.00191631	0.960795
cg19189355	-0.0428086	9.93776e-05	0.00748035	0.567599		-0.0428429	9.80118e-05	0.00945577	0.582959	-0.00417846	0.859801
cg19212828	0.100504	5.21548e-06	-0.065414	0.0126826		0.0999856	4.74177e-06	-0.0248964	0.463536	-0.0872101	0.0637328
cg19515468	0.0914232	7.59457e-05	-0.0972255	0.00032562		0.0918028	6.19868e-05	-0.0665915	0.0531364	-0.071089	0.147094
cg19572487	-0.191252	4.66763e-07	0.0375112	0.403465		-0.19087	4.74935e-07	0.0154239	0.789402	0.0491076	0.544608
cg19614811	-0.207048	0.000104413	-0.166822	0.0188494		-0.230019	5.34772e-06	-0.514605	2.38497e-11	0.636439	1.76658e-09
cg19623519	-0.0252105	0.0593277	0.0133117	0.410244		-0.0245676	0.060566	-0.027043	0.189245	0.0844105	0.00286588
cg19655032	-0.0363681	0.0707227	-0.038387	0.12166		-0.0371771	0.0471719	-0.150989	3.72508e-07	0.226878	2.14818e-08
cg19910568	0.074113	0.0233077	-0.065446	0.0865361		0.0741153	0.0233046	-0.0652087	0.173403	-0.000570369	0.993449
cg19925178	0.112374	3.30852e-10	0.00646217	0.759373		0.111743	2.6188e-10	0.0390946	0.14925	-0.0723793	0.0562115
cg20072001	0.0696843	0.000253416	0.0146267	0.519478		0.069695	0.000251849	0.0118438	0.695231	0.00575307	0.888764
cg20353780	-0.145831	3.59501e-05	0.0680717	0.101582		-0.143754	4.36493e-05	0.00814419	0.877836	0.127202	0.0816402
cg20407796	-0.0902088	0.000975305	0.0184145	0.563861		-0.0898247	0.0010298	0.00278478	0.946055	0.0341538	0.551693
cg20529334	0.0846985	4.50514e-05	-0.0394068	0.108749		0.0845209	4.29294e-05	-0.0183684	0.561277	-0.0475787	0.286228
cg20668718	-0.116773	0.0106897	-0.0579912	0.320482		-0.121014	0.00657088	-0.260925	0.000268816	0.382301	7.18297e-05
cg20778199	-0.158559	2.28306e-05	0.0399131	0.384061		-0.157817	1.87658e-05	-0.0630429	0.282723	0.208521	0.00896997
cg20805479	0.0854632	0.00483137	-0.054104	0.138695		0.085391	0.00488976	-0.049502	0.318665	-0.00905804	0.891372
cg20806296	-0.111381	0.0035781	-0.0124846	0.78475		-0.110429	0.00342942	-0.104462	0.0751596	0.19418	0.0163613
cg20873046	0.0718926	0.000628183	-0.0513836	0.0425452		0.0716638	0.000660569	-0.0422465	0.216668	-0.0180659	0.692596
cg20992503	0.135537	1.08414e-05	-0.0379089	0.305286		0.135473	1.05039e-05	-0.021739	0.652196	-0.0354549	0.598371
cg21078247	0.0809327	1.09709e-06	-0.0473168	0.0158782		0.0803318	7.46087e-07	-0.00239788	0.923862	-0.0980474	0.00495353
cg21126306	0.0947554	1.87687e-06	-0.122363	1.43303e-07		0.0943989	1.97627e-06	-0.142794	1.16579e-06	0.0469427	0.263809
cg21217129	-0.0476778	0.0219024	0.0466757	0.057995		-0.0474804	0.0225506	0.0403469	0.213788	0.0132341	0.765553
cg21350392	0.106424	6.6001e-05	-0.0496031	0.138904		0.10497	6.92123e-05	-0.127588	0.00258843	0.158886	0.00638444
cg21364231	-0.119108	2.1557e-07	0.123172	4.52588e-06		-0.119419	1.93758e-07	0.112195	0.00103932	0.025583	0.601137
cg21557724	0.0528473	0.0474724	0.00836566	0.786149		0.0518227	0.0497332	0.0455045	0.250977	-0.0856753	0.128597
cg21571793	-0.163192	4.56634e-07	-0.00413064	0.916011		-0.163116	4.31077e-07	-0.0518341	0.318199	0.0952278	0.173489
cg21599794	0.0709784	0.000335874	-0.102222	1.14783e-05		0.0708851	0.00033916	-0.115744	9.38707e-05	0.0308522	0.463842
cg21646084	-0.044018	0.0528223	-0.0865362	0.00210344		-0.045772	0.0317001	-0.209297	5.00204e-10	0.248051	7.18921e-08
cg21694626	0.0812898	0.00022283	-0.122961	1.9453e-06		0.0813377	0.00021867	-0.115933	0.000471899	-0.0158601	0.734711
cg21860285	-0.0557123	0.000595586	-0.0790103	4.88272e-05		-0.0559232	0.00042786	-0.129004	2.24384e-07	0.102955	0.00247025
cg21963656	0.0957009	0.000294871	-0.0080736	0.797727		0.0956954	0.00029554	-0.00719089	0.865242	-0.00176837	0.975167
cg22010909	0.0196711	0.335702	-0.0669454	0.00462237		0.0198998	0.323294	-0.0305011	0.316086	-0.0829886	0.0528494
cg22067527	-0.062894	0.00039141	0.0797818	0.00018995		-0.0625664	0.00042507	0.0708911	0.0124472	0.0182181	0.63617
cg22091132	0.0927823	7.74574e-07	0.00378279	0.866221		0.0927099	7.94695e-07	0.0157062	0.603168	-0.0237314	0.559029
cg22092397	-0.0533657	0.0465562	0.0315259	0.33283		-0.0525787	0.0433007	-0.0644887	0.115471	0.198538	0.000403728
cg22397910	0.0790533	5.15075e-05	0.00220965	0.924477		0.078877	5.40835e-05	0.0120815	0.695457	-0.0204651	0.627161
cg22459078	0.0910441	1.20293e-05	-0.140425	6.83775e-09		0.0913635	1.04051e-05	-0.122382	7.14144e-05	-0.0418707	0.341031
cg22460590	0.0647039	0.000107286	0.0048867	0.804643		0.0641852	0.000114476	0.0230531	0.37044	-0.0395304	0.269268
cg22466850	0.106623	2.69413e-06	-0.0527041	0.0466118		0.106009	2.40838e-06	-0.0182016	0.589694	-0.0805605	0.0949282
cg22852353	-0.0912973	0.00456966	-0.0261717	0.517998		-0.0922481	0.00342079	-0.144666	0.00473358	0.231526	0.000770955
cg23076299	0.0944141	4.94032e-07	0.0371991	0.103103		0.0945851	4.55271e-07	0.0610786	0.0447823	-0.0476195	0.246052
cg23094080	0.0558408	0.0131982	0.00113358	0.96629		0.0558649	0.0131272	-0.00262888	0.941358	0.00778429	0.872619
cg23098168	0.1436	2.09912e-07	-0.0957133	0.00285717		0.143782	1.97682e-07	-0.0883102	0.0286559	-0.0178795	0.760384
cg23629792	-0.139243	0.000701204	-0.0583119	0.231868		-0.139209	0.000656525	-0.146087	0.0179789	0.183886	0.031402
cg24003539	0.0945109	0.00254536	-0.0952604	0.0106074		0.0946746	0.0024943	-0.106143	0.0298418	0.0232973	0.729738
cg24070837	-0.0821683	6.656e-05	0.046685	0.0577322		-0.0826547	5.85586e-05	0.060568	0.0646497	-0.0288867	0.518664
cg24162465	0.0898189	0.000122778	-0.061726	0.0244663		0.0901495	8.6572e-05	-0.0113995	0.748195	-0.112161	0.0236667
cg24170784	-0.0377335	0.00369105	0.00207911	0.892507		-0.0374451	0.00385052	-0.01388	0.486295	0.0343511	0.214587
cg24263998	-0.0533241	0.0376096	-0.0690879	0.0338642		-0.0574979	0.0184742	-0.210281	1.62565e-07	0.26406	7.48427e-07
cg24315257	0.178971	1.01273e-12	-0.121053	3.74936e-05		0.178888	3.17909e-13	-0.058853	0.111571	-0.142182	0.00684957
cg24377560	0.128268	1.32626e-07	-0.14818	5.53861e-07		0.126909	1.10828e-07	-0.0809916	0.034163	-0.137348	0.0083762
cg24538512	0.15024	4.98161e-06	-0.0848469	0.024491		0.150814	3.36225e-06	-0.0324169	0.497107	-0.127382	0.0658062
cg24651790	0.104069	6.79252e-07	-0.121803	7.88358e-07		0.104064	6.8168e-07	-0.123904	9.29791e-05	0.00471625	0.916074
cg24807761	0.0830655	0.00073128	-0.107856	0.000356069		0.0817863	0.000825505	-0.157096	3.20254e-05	0.108516	0.0420048
cg24859433	-0.17877	1.21099e-16	-0.0975297	0.000117912		-0.178664	1.07235e-16	-0.0818657	0.0151927	-0.0323979	0.479097
cg25015290	0.0871244	0.00014462	-0.00697649	0.799702		0.0870947	0.000145985	-0.0010649	0.976943	-0.0119324	0.81017
cg25051052	-0.0757497	0.00284525	0.164647	1.21384e-07		-0.0737491	0.00342628	0.104833	0.0103959	0.117636	0.0318534
cg25155298	-0.0969598	0.00184266	0.0192985	0.613539		-0.0967664	0.00158783	-0.0745415	0.131305	0.184593	0.00535254
cg25411699	-0.0321663	0.0852	0.203585	2.75037e-20		-0.0318521	0.0883024	0.213651	7.35535e-14	-0.0221103	0.579938
cg25457109	-0.048853	0.00191032	0.0199957	0.288911		-0.0485491	0.00199978	0.00179049	0.942268	0.0379503	0.262574
cg25538883	-0.054578	0.0187182	0.0348734	0.224092		-0.0537042	0.0161627	-0.0649759	0.0706152	0.199977	4.08769e-05
cg25575845	-0.0554285	0.0165127	0.0522045	0.0609138		-0.0548145	0.01755	0.0225064	0.538116	0.0611145	0.219641
cg25840536	-0.0490151	0.00107974	-0.0241121	0.181072		-0.0487034	0.00087856	-0.0718107	0.00174569	0.0992924	0.0015855
cg25842470	0.142381	4.6991e-07	-0.107003	0.00189682		0.14214	4.97485e-07	-0.094043	0.0480908	-0.0246423	0.693275
cg25867545	-0.0639249	0.000122083	0.123975	2.39391e-10		-0.0638467	0.000125213	0.128218	2.87077e-07	-0.00969241	0.783997
cg25910466	0.0709471	0.000649887	-0.00402676	0.871142		0.0708748	0.000660183	0.00737423	0.822297	-0.0235013	0.59914
cg26000722	-0.145579	4.89018e-08	0.175228	2.31479e-08		-0.143063	7.01088e-08	0.223079	6.67133e-09	-0.11293	0.0436373
cg26061593	-0.0649128	0.013392	-0.000696825	0.982576		-0.0640482	0.0112541	-0.108338	0.00616977	0.221364	4.35559e-05
cg26227186	0.13163	1.80094e-09	-0.0459962	0.0805445		0.131601	1.83285e-09	-0.0428347	0.225654	-0.00634723	0.893658
cg26319015	0.0543635	0.0353184	-0.0791329	0.00824722		0.0543537	0.035383	-0.080617	0.0323102	0.00353911	0.948252
cg26433208	0.0765535	0.000517869	0.00690717	0.790696		0.0766324	0.000503001	-0.0023401	0.946244	0.0191834	0.685504
cg26440142	-0.0412913	0.0459782	0.0380943	0.133835		-0.0405946	0.0450142	-0.0315057	0.3293	0.140653	0.00134947
cg26487629	0.232754	5.52439e-08	-0.168231	0.000953576		0.233138	4.03893e-08	-0.104855	0.1032	-0.144467	0.113869
cg26530713	-0.0567639	0.00158488	0.0482993	0.0256974		-0.0562967	0.00166183	0.0219296	0.441405	0.0541285	0.162037
cg26544188	-0.0404418	0.0166868	0.0320432	0.10475		-0.0412833	0.0137425	0.0579367	0.0240726	-0.0565768	0.112686
cg26698819	-0.0590925	0.0236989	0.0374099	0.245426		-0.0584703	0.0217648	-0.0568214	0.165999	0.187439	0.000721129
cg26872588	-0.0202502	0.200553	0.0501372	0.00842349		-0.0199535	0.207106	0.0382273	0.125905	0.0249105	0.466272
cg26947060	-0.109051	8.4459e-09	0.137504	4.78507e-10		-0.108965	8.92349e-09	0.139603	5.107e-07	-0.00499351	0.901206
cg27060240	-0.02872	0.318117	0.145296	2.57671e-05		-0.0273515	0.342204	0.117036	0.00856821	0.0601789	0.325139
cg27110491	-0.00546447	0.741729	0.131011	4.21683e-11		-0.00496686	0.764654	0.120006	3.10951e-06	0.0239279	0.503702
cg27167195	0.141909	3.13171e-08	-0.146216	1.03045e-06		0.142065	2.85319e-08	-0.131967	0.000524558	-0.0331183	0.541743
cg27248887	-0.119122	3.4966e-05	-0.00480306	0.887481		-0.11826	3.33308e-05	-0.0542714	0.213988	0.109193	0.073683
cg27258878	0.155032	2.0774e-11	-0.0786474	0.00513103		0.153326	8.51135e-12	0.0079026	0.825569	-0.173507	0.000354991
cg27345534	-0.0649864	0.0514439	0.0484026	0.243932		-0.0643563	0.0477835	-0.0822949	0.118165	0.252774	0.000341399
cg27379715	-0.225259	2.33374e-06	-0.107848	0.0556765		-0.224861	2.30326e-06	-0.161253	0.0289446	0.113553	0.262911
cg27401989	-0.0765599	0.000392025	0.26346	4.44983e-26		-0.0758732	0.000459014	0.271782	6.71342e-18	-0.0193572	0.670453
cg27589809	-0.0581469	0.015391	0.157721	4.53063e-08		-0.0580033	0.0157112	0.152475	6.00036e-05	0.0108109	0.83537
cg27665449	-0.0667356	3.42123e-05	0.128579	1.96677e-11		-0.066143	3.60991e-05	0.155089	2.4023e-10	-0.0581401	0.0898368
cg00068377	0.0933561	0.000463132	-0.0260694	0.4253		0.0938323	0.000396886	-0.082478	0.0400659	0.127312	0.0263238
cg00086809	-0.107502	0.00173956	0.221631	4.05854e-08		-0.107253	0.00180615	0.227767	9.41838e-06	-0.0140959	0.847919
cg00475815	0.0593482	0.0098056	-0.0205237	0.456799		0.0594595	0.00954138	-0.033799	0.365482	0.0265652	0.595666
cg00681665	0.108131	0.000195433	-0.135403	8.23656e-05		0.108104	0.000190271	-0.115293	0.00911671	-0.0448018	0.470792
cg00794722	0.0392356	0.0164782	-0.137354	1.63805e-12		0.0391829	0.0164915	-0.127096	5.23039e-07	-0.0221275	0.528848
cg00887547	-0.0710007	0.000339273	0.203506	2.53334e-18		-0.0682089	0.000515433	0.244999	1.58069e-17	-0.0954155	0.0207766
cg00918738	-0.026496	0.103188	0.0413572	0.0328684		-0.0260496	0.108613	0.024376	0.331444	0.0364767	0.29368
cg00959749	-0.120183	0.00401385	-0.183534	0.000284003		-0.125987	0.00134335	-0.395219	3.0593e-11	0.43994	8.82597e-08
cg01123250	0.288274	3.59676e-09	-0.239216	5.56376e-05		0.287899	3.70648e-09	-0.21326	0.00639499	-0.0540437	0.614138
cg01209150	-0.084991	0.0324553	-0.00516597	0.918609		-0.0882284	0.0233194	-0.172159	0.0074746	0.30673	0.000313138
cg01233786	0.0993851	0.0012364	-0.130568	0.00075861		0.0940062	0.00197626	-0.232574	1.37036e-06	0.203555	0.00192371
cg01337429	0.0893803	9.73436e-06	-0.00211236	0.9278		0.0885868	8.32482e-06	0.0371543	0.211809	-0.0905553	0.0314008
cg01342858	0.0473444	0.0911704	-0.0296772	0.366436		0.0473073	0.0914856	-0.0282248	0.505558	-0.00325052	0.95673
cg01419670	-0.0954403	0.0158799	0.082105	0.0809063		-0.0947467	0.0164	0.0406852	0.505934	0.0889452	0.293445
cg01427976	0.10615	1.12892e-09	0.00598171	0.777141		0.105828	6.05662e-10	0.061846	0.0223967	-0.111729	0.00231744
cg01476047	-0.10963	0.00150059	0.142298	0.000938185		-0.107288	0.00177702	0.0591803	0.293978	0.161466	0.031977
cg01552711	-0.0279965	0.121282	0.0502104	0.0203531		-0.0274302	0.128545	0.0301025	0.282319	0.0429167	0.267598
cg01592662	-0.114349	7.03476e-06	0.261365	4.5194e-19		-0.111966	1.1182e-05	0.287239	7.31566e-16	-0.0652177	0.218571
cg01700035	0.0737507	0.00172851	-0.119948	2.24471e-05		0.0733144	0.00177772	-0.0917654	0.0133098	-0.0591009	0.245123
cg01704976	0.141068	9.74315e-08	0.00370126	0.906179		0.13982	7.82784e-08	0.0831454	0.0335507	-0.165176	0.00233289
cg01739965	-0.0764456	0.00127752	0.246664	4.68708e-19		-0.0742018	0.00175389	0.276844	6.91939e-16	-0.0714495	0.150805
cg01769354	-0.0440585	0.00617708	-0.0295617	0.124483		-0.0433197	0.00517171	-0.0898021	0.000204318	0.127608	0.000128706
cg01785490	-0.0561736	0.110022	0.016101	0.717024		-0.056365	0.101512	-0.115304	0.0415938	0.251309	0.000899274
cg01922433	0.0532267	0.0117773	-0.0702022	0.00573634		0.0529958	0.0121347	-0.0886044	0.00739416	0.0391329	0.392938
cg02047547	0.134514	2.64701e-06	-0.0391185	0.232111		0.134087	2.30286e-06	-0.00217468	0.957718	-0.0898622	0.129911
cg02283353	0.10025	2.55808e-06	-0.0599169	0.0139546		0.100222	2.24654e-06	-0.0398117	0.18926	-0.0507446	0.257121
cg02340915	-0.0952258	1.51053e-05	0.0884182	0.000740137		-0.0957885	1.25225e-05	0.069381	0.0410669	0.04243	0.374329
cg02423267	0.0580494	0.00593549	-0.00421352	0.866094		0.057352	0.0061692	0.0249276	0.447015	-0.0630747	0.165029
cg02423618	-0.0455768	0.131081	-0.0498237	0.169979		-0.0451529	0.118311	-0.172263	0.000104816	0.260387	2.41958e-05
cg02618319	0.0427302	0.0309298	-0.072308	0.00171992		0.0428522	0.0288696	-0.0441417	0.135264	-0.0652713	0.121055
cg02706575	-0.0590596	0.060477	-0.0516203	0.198809		-0.0639169	0.0297761	-0.245156	1.94045e-07	0.369698	6.11881e-09
cg02709840	-0.0838137	0.00295302	0.250577	3.69658e-14		-0.0821654	0.00360498	0.27518	3.4058e-11	-0.0572852	0.33553
cg02812891	0.102704	1.41936e-06	-0.106374	2.59229e-05		0.102863	1.32343e-06	-0.122727	0.000188484	0.0354959	0.437046
cg02832305	0.162786	3.69944e-07	-0.0497675	0.182461		0.162536	3.3939e-07	-0.0254677	0.584272	-0.0607887	0.372852
cg02933375	0.118802	3.60299e-07	-0.0631715	0.0180399		0.118686	2.47109e-07	-0.0245584	0.462714	-0.0951804	0.0498223
cg03299095	0.0838687	0.000100384	-0.0645894	0.0113636		0.0839273	9.45909e-05	-0.0497192	0.132861	-0.033284	0.475247
cg03329539	-0.151394	5.87154e-13	-0.045587	0.0703089		-0.151127	5.99661e-13	-0.0587615	0.0751907	0.0282584	0.536089
cg03449125	-0.0459304	0.0105149	-0.0370924	0.0861985		-0.0458396	0.010372	-0.0646754	0.022235	0.0570382	0.140196
cg03485672	-0.0777204	0.000267688	-0.0361728	0.153808		-0.0776766	0.000268515	-0.0546952	0.103112	0.0378202	0.406058
cg03516394	0.110012	9.75879e-09	-0.113775	5.89881e-07		0.109905	9.62602e-09	-0.131091	7.56161e-06	0.038146	0.352113
cg03621406	-0.104817	5.68136e-05	0.237031	2.10239e-14		-0.099547	9.74881e-05	0.313542	9.15612e-17	-0.17262	0.0013489
cg03708990	-0.0410958	0.00610609	0.00298495	0.867701		-0.0411475	0.00602148	0.00738725	0.755847	-0.0091737	0.777279
cg03793872	-0.0617722	0.0206291	0.0528586	0.109844		-0.0608252	0.0203309	-0.0321496	0.448613	0.169127	0.00313948
cg03859106	0.109243	9.09351e-08	-0.107808	6.02558e-06		0.109351	7.69303e-08	-0.0875153	0.00403035	-0.0466077	0.280703
cg03915940	-0.0447657	0.0637977	-0.0103076	0.725951		-0.0442502	0.062029	-0.0821739	0.0289345	0.147101	0.00410408
cg03925157	0.045185	0.0164613	-0.0218582	0.335694		0.0452144	0.0163774	-0.0239582	0.428606	0.00420081	0.918411
cg03930929	-0.115644	0.0445985	0.00251771	0.97313		-0.119379	0.0315894	-0.276236	0.00126597	0.541657	4.7303e-06
cg04337618	-0.213495	2.3047e-09	0.204101	1.31153e-06		-0.212786	2.53549e-09	0.233491	1.25462e-05	-0.068009	0.371939
cg04400496	0.230258	3.92429e-08	-0.21698	1.29923e-05		0.229481	3.60912e-08	-0.288059	5.03952e-06	0.162007	0.0703258
cg04716530	-0.133551	0.000526824	0.285474	1.49941e-09		-0.132924	0.00057315	0.272098	1.92169e-05	0.0263103	0.756986
cg04722977	0.0876059	0.000140221	0.000188024	0.99454		0.0874848	0.000144171	0.0123522	0.735213	-0.0248101	0.616069
cg04822973	0.0916331	2.79513e-05	-0.00325884	0.900798		0.0916395	2.78755e-05	-0.0043659	0.901647	0.00220941	0.962815
cg04908325	0.0937452	1.79659e-05	-0.0262225	0.316447		0.094069	1.56968e-05	-0.0455044	0.203843	0.0379914	0.425526
cg04951822	-0.156775	2.66501e-05	0.228831	2.46918e-07		-0.156438	2.56541e-05	0.28007	1.07274e-06	-0.112273	0.160375
cg05066621	-0.0435418	0.0711418	0.0569424	0.056041		-0.0423169	0.0720818	-0.029622	0.43483	0.173254	0.000735083
cg05093469	0.10852	1.4406e-05	-0.110492	0.000133234		0.108422	1.46994e-05	-0.125792	0.000463618	0.0370398	0.479914
cg05107228	0.0410282	0.075404	-0.0297009	0.271655		0.0408869	0.0753778	-0.0133677	0.698186	-0.0381494	0.438739
cg05179805	0.0728824	0.00341333	0.0126501	0.672929		0.0728563	0.00336115	-0.0031262	0.938538	0.0316017	0.560861
cg05192538	-0.035152	0.0560986	0.0373351	0.0943426		-0.0348767	0.0579034	0.0193355	0.516669	0.0361407	0.368664
cg05213267	0.1023	0.00137493	0.0538341	0.166684		0.104368	0.00106212	-0.00219435	0.964599	0.120911	0.0805874
cg05331472	-0.0851504	0.00144768	0.0363191	0.267939		-0.0847021	0.00139519	-0.0270887	0.526647	0.126467	0.0285579
cg05575273	0.124295	5.50264e-09	-0.0709464	0.00700071		0.12408	5.89252e-09	-0.0874284	0.00967294	0.0360087	0.444665
cg05633605	-0.0830299	0.0907531	-0.13739	0.0274392		-0.0947103	0.0401876	-0.41429	1.77955e-09	0.555416	7.6298e-09
cg05725703	-0.0668864	0.000156436	0.00355887	0.865759		-0.0669644	0.000153008	0.00811911	0.769237	-0.00970737	0.798479
cg05844366	0.249179	1.86204e-07	-0.259505	5.60359e-06		0.24921	1.85628e-07	-0.257288	0.00043666	-0.00501634	0.961338
cg05853039	-0.202087	1.20318e-08	0.259683	3.43439e-10		-0.204101	6.75824e-09	0.214507	3.49881e-05	0.107783	0.150228
cg05880945	-0.118328	1.49597e-05	0.145282	8.55752e-06		-0.117515	1.46669e-05	0.198024	1.30396e-06	-0.118624	0.0406448
cg05985501	-0.0724366	6.6056e-08	0.0127845	0.421059		-0.0728428	4.33143e-08	0.0350269	0.091709	-0.0474008	0.0974945
cg06026375	-0.0697432	0.0504157	0.187598	1.25083e-05		-0.0695509	0.05149	0.183998	0.00121645	0.00746945	0.923325
cg06060868	-0.0973385	3.52541e-05	0.105213	0.000155999		-0.0978916	3.07476e-05	0.122072	0.000914439	-0.0355124	0.480653
cg06280512	-0.131605	1.8339e-05	0.266109	2.79604e-14		-0.128802	2.84938e-05	0.295317	1.81202e-12	-0.0767433	0.226369
cg06361278	-0.0753342	0.000791599	0.14693	3.05947e-08		-0.0753532	0.000786519	0.143457	2.67448e-05	0.00774245	0.871791
cg06500120	0.0786927	0.00012022	-0.0365619	0.143883		0.0784125	0.000122019	-0.00349839	0.916738	-0.0645851	0.147561
cg06616029	0.105005	2.61635e-07	-0.0160334	0.514179		0.105376	2.08865e-07	-0.0376702	0.258522	0.0434719	0.331637
cg06658468	-0.144688	0.000367377	0.273483	1.26993e-08		-0.142219	0.000444541	0.331654	3.87269e-08	-0.135296	0.117562
cg06866416	0.133572	2.85578e-13	-0.00506149	0.816552		0.133499	2.98731e-13	0.00511144	0.861543	-0.0201831	0.606172
cg06989074	0.160704	2.66185e-05	-0.0930173	0.0330992		0.160741	2.53304e-05	-0.0761485	0.15481	-0.0442101	0.581149
cg06991955	0.109833	0.00106344	-0.0800354	0.0352966		0.109873	0.000905538	-0.0319055	0.50473	-0.119834	0.0861518
cg07104380	0.0343937	0.048467	-0.118371	8.02463e-09		0.0344707	0.0470715	-0.100516	0.000135333	-0.0401252	0.27986
cg07141622	0.0823432	0.00837023	-0.0119483	0.750159		0.08232	0.00841518	-0.00566226	0.911019	-0.0124808	0.854066
cg07153264	0.0809237	4.09543e-05	0.0436993	0.0621166		0.0798142	4.50313e-05	0.0708139	0.0184844	-0.0619836	0.143873
cg07205462	0.0957578	0.00311921	-0.0618574	0.116153		0.0956293	0.00318583	-0.0518933	0.338041	-0.0189682	0.790095
cg07267166	-0.171538	3.85391e-05	0.313804	5.91462e-11		-0.169563	5.02344e-05	0.335902	1.02957e-08	-0.0557454	0.520892
cg07277624	0.0827108	0.00114284	0.000143233	0.99622		0.082713	0.00114351	0.000927901	0.981819	-0.00157158	0.977216
cg07346171	-0.141629	3.71474e-05	0.00684947	0.870208		-0.140455	3.21826e-05	-0.107038	0.0439062	0.223904	0.00179999
cg07399636	-0.134715	7.45223e-05	-0.0638968	0.112525		-0.136102	5.58171e-05	-0.13641	0.00808288	0.150793	0.0334262
cg07495755	0.0188392	0.164851	-0.0597838	0.000194986		0.0187344	0.165794	-0.0464173	0.0257288	-0.0291945	0.313975
cg07589519	-0.0426101	0.00297395	0.06214	0.000290825		-0.0413003	0.00329961	0.0193813	0.372787	0.0899855	0.00269539
cg07604202	0.117974	1.54849e-06	-0.144793	5.94227e-07		0.118149	1.15453e-06	-0.103048	0.00524233	-0.0944505	0.0700052
cg07804408	0.0843213	0.00359344	-0.0372465	0.285627		0.0845862	0.00349377	-0.0549654	0.225702	0.0380385	0.545924
cg07855322	0.128433	1.95905e-10	-0.0800513	0.000826682		0.128494	1.81377e-10	-0.0981786	0.00135322	0.040429	0.348146
cg08040148	0.117762	0.000238077	-0.171948	7.27566e-06		0.11767	0.000238618	-0.158293	0.00152769	-0.0294322	0.670751
cg08062329	0.0700822	0.000702427	-0.0258725	0.298455		0.0700124	0.000715627	-0.0194814	0.563426	-0.0126197	0.779778
cg08079331	-0.0718175	0.00430618	-0.00812421	0.782802		-0.0712894	0.00446414	-0.0464938	0.219221	0.0817301	0.119069
cg08099570	-0.0351572	0.0363039	-0.0154195	0.444456		-0.0346599	0.0342458	-0.0687049	0.0073298	0.112278	0.00143902
cg08141342	0.0831016	0.0148552	-0.0672637	0.10063		0.0835565	0.0141818	-0.084043	0.135782	0.0325129	0.662418
cg08240592	-0.0250798	0.083235	-0.00442633	0.79962		-0.0246231	0.0820598	-0.0486593	0.0279524	0.0931069	0.00225839
cg08371086	0.135784	1.77725e-10	-0.0690172	0.00611418		0.135771	1.80423e-10	-0.0748308	0.0209545	0.0128316	0.777537
cg08431873	-0.0854277	1.45414e-06	0.16781	1.35356e-15		-0.0842272	2.00874e-06	0.188462	1.34828e-12	-0.0465945	0.217324
cg08524717	0.101448	0.00100555	-0.114954	0.00143822		0.101557	0.00089716	-0.0701476	0.126564	-0.102181	0.116268
cg08598287	-0.0505916	0.0468798	-0.0244344	0.418079		-0.0503413	0.0478779	-0.0457364	0.244143	0.0454624	0.403182
cg08704623	0.14083	8.86605e-10	-0.120917	8.99191e-06		0.140682	7.62134e-10	-0.0932248	0.00769099	-0.0614583	0.210806
cg08740477	0.0886995	0.00435136	-0.0486888	0.199279		0.0883596	0.00455337	-0.0295103	0.564605	-0.0376284	0.582662
cg08773029	0.116337	1.15455e-08	-0.00202223	0.93238		0.116219	1.16832e-08	0.00340456	0.909977	-0.0128887	0.76695
cg08924554	-0.174492	2.97452e-05	0.379799	1.04729e-15		-0.170471	4.93611e-05	0.410137	2.78769e-13	-0.0843975	0.331563
cg08993103	-0.113596	2.56786e-05	0.0770696	0.0193572		-0.11236	3.00652e-05	0.0320685	0.459976	0.0897453	0.123777
cg09048334	0.143386	0.000649325	-0.165945	0.00110356		0.143909	0.00062402	-0.177396	0.0125296	0.021548	0.816547
cg09075525	0.19586	1.1289e-09	-0.137485	0.000249697		0.196386	7.7699e-10	-0.0981966	0.0378994	-0.0926088	0.172258
cg09299076	0.0510422	0.0196149	-0.0049211	0.847321		0.0497116	0.0175737	0.0705577	0.0314322	-0.167949	0.000225178
cg09331995	0.13621	9.33652e-06	-0.194736	1.32107e-07		0.136081	9.43866e-06	-0.182189	0.000161749	-0.0267651	0.688231
cg09376008	-0.138461	3.51924e-06	0.156942	6.78337e-06		-0.138436	3.55176e-06	0.158247	0.000324457	-0.00306802	0.961277
cg09538725	0.0700177	3.48552e-06	-0.0741857	3.23975e-05		0.0699793	3.46295e-06	-0.0680694	0.00327966	-0.013422	0.677794
cg09725686	-0.0341594	0.053952	0.0564418	0.00755527		-0.0340779	0.0546351	0.0529748	0.0560347	0.00734689	0.846962
cg09740598	-0.0482513	0.00577762	0.0363855	0.0810382		-0.0478107	0.0061614	0.016847	0.534517	0.0413927	0.267922
cg09749862	0.118136	6.55462e-05	-0.119776	0.000364091		0.118506	5.69215e-05	-0.0973363	0.0194386	-0.0577577	0.35094
cg09794469	0.195442	1.60821e-05	-0.152805	0.0032039		0.195887	1.49637e-05	-0.139163	0.0286906	-0.0355632	0.707862
cg09801837	-0.0664359	0.0127365	0.120598	0.000272763		-0.0653204	0.0141539	0.0787896	0.0748176	0.0816265	0.165466
cg09834444	0.016625	0.200971	-0.070461	5.0982e-06		0.016402	0.204389	-0.0517231	0.00988802	-0.0404266	0.14564
cg09934692	-0.0530688	0.0343113	-0.0855554	0.00673653		-0.0566252	0.0192678	-0.203109	2.90781e-07	0.223702	2.30848e-05
cg10094238	0.0466425	0.00563767	0.0131757	0.506122		0.0463161	0.00580626	0.0280022	0.274493	-0.0330841	0.357194
cg10326891	-0.132707	4.92155e-08	0.186388	3.50544e-11		-0.133117	4.53491e-08	0.179377	3.48667e-07	0.0170704	0.73936
cg10336578	0.0780998	7.54819e-06	-0.0929339	8.12048e-06		0.078105	7.31642e-06	-0.107854	6.41633e-05	0.0323871	0.388038
cg10415122	0.160951	7.63464e-06	-0.232112	4.43535e-08		0.1609	7.72905e-06	-0.23424	1.28339e-05	0.00503958	0.947766
cg10446401	-0.104989	1.95337e-05	0.190667	2.16529e-11		-0.105494	1.75875e-05	0.179741	6.2205e-07	0.0257186	0.61944
cg10542127	-0.0390762	0.0395078	0.0540805	0.0165319		-0.0383596	0.0382485	-0.00158258	0.956012	0.120021	0.00255567
cg10553894	0.0746342	0.000119147	-0.0365215	0.103795		0.0741839	0.000102576	-0.000807146	0.977378	-0.0842069	0.0384097
cg10716494	0.0540627	0.0653516	-0.0388304	0.27586		0.0540718	0.0652785	-0.0404295	0.404693	0.00312615	0.961233
cg10778931	0.111335	2.34358e-08	-0.0875524	0.000197634		0.111362	2.2194e-08	-0.0778666	0.00966826	-0.0220539	0.604954
cg10795359	0.0694243	0.000472236	-0.0228155	0.337072		0.0696157	0.000438696	-0.0398795	0.210615	0.034858	0.418516
cg10887309	0.0664658	0.0291069	-0.0739258	0.0468038		0.066596	0.0286437	-0.0858207	0.0928603	0.0230638	0.732904
cg11023992	-0.0766358	0.0134453	0.0165529	0.649536		-0.0762326	0.014016	-0.000142159	0.997596	0.0360503	0.582107
cg11130097	0.0461568	0.00617723	-0.132296	3.49461e-11		0.0462072	0.0060284	-0.120423	3.36769e-06	-0.0259747	0.472094
cg11543196	-0.0735902	0.00370186	-0.0763035	0.0147977		-0.0756758	0.00228981	-0.172274	1.86355e-05	0.182849	0.000658926
cg11648740	-0.0425804	0.101918	0.0224417	0.490821		-0.0426558	0.0911041	-0.0848461	0.0386124	0.211044	0.000136702
cg11814935	0.156688	4.41806e-08	-0.0588986	0.0835029		0.156574	4.63915e-08	-0.0527991	0.251106	-0.0120028	0.84446
cg11925103	0.138499	7.88661e-06	-0.146904	2.60088e-05		0.138589	7.74885e-06	-0.144233	0.000634952	-0.0074504	0.907461
cg11930700	0.147251	6.52419e-08	-0.137954	1.75558e-05		0.147191	6.56581e-08	-0.152463	0.000203681	0.0328855	0.571727
cg12168066	-0.0834186	0.00139471	0.109376	0.000666119		-0.0824032	0.00156166	0.0690467	0.103979	0.0808506	0.158367
cg12219123	-0.143649	3.41765e-10	0.0600264	0.0251996		-0.143501	3.38162e-10	0.0518844	0.128051	0.0192527	0.696658
cg12279175	-0.0572817	0.0286971	0.0708353	0.0287186		-0.0559652	0.0310849	0.00529194	0.901045	0.12834	0.0244752
cg12384262	0.078716	0.00035794	-0.105552	2.41222e-05		0.0793123	0.000269748	-0.071717	0.0225428	-0.0830321	0.0698294
cg12482260	0.155351	3.67792e-17	0.00214212	0.924036		0.155285	3.89141e-17	0.00918773	0.763212	-0.0138454	0.733857
cg12617684	-0.0672398	0.0227701	0.0351952	0.3319		-0.0664287	0.0217849	-0.0576595	0.212206	0.188326	0.00274578
cg12623107	-0.180848	4.18475e-07	-0.112746	0.0074049		-0.181483	2.97907e-07	-0.19744	0.000207991	0.177197	0.0159217
cg12660445	-0.0578319	0.00169981	0.104597	1.97327e-06		-0.0574383	0.00168482	0.0734422	0.0100231	0.06657	0.0910704
cg12661610	-0.046374	0.0023586	-0.0328765	0.0732624		-0.0462664	0.00188033	-0.0816132	0.000501529	0.101017	0.00163973
cg12720459	-0.0730888	3.10263e-05	0.199678	5.41364e-22		-0.0704601	3.63147e-05	0.254968	3.66854e-24	-0.127106	0.000424085
cg12747410	-0.0792989	0.0102895	0.0659468	0.0693977		-0.0772125	0.0120648	0.00907575	0.844237	0.121468	0.0584417
cg12752325	-0.0712572	0.0170895	0.00967452	0.790296		-0.0707289	0.0152857	-0.0891962	0.0524407	0.203147	0.00123867
cg12806681	-0.187328	1.75207e-08	0.0243662	0.529941		-0.187841	1.32386e-08	0.0618988	0.242487	-0.0748549	0.289515
cg12876356	-0.312709	2.8227e-08	-0.00963494	0.882199		-0.312987	2.44226e-08	0.0302675	0.729289	-0.0818488	0.487389
cg13286990	-0.080253	0.0014675	0.0533388	0.0813127		-0.0790499	0.00161485	0.000249231	0.995068	0.105585	0.0523554
cg13324539	0.0998738	5.30108e-11	-0.0338725	0.060969		0.0997708	5.17835e-11	-0.0244942	0.295512	-0.0206693	0.527654
cg13424330	0.129615	3.26341e-06	-0.0411181	0.225098		0.129621	3.27067e-06	-0.0414642	0.378583	0.000656387	0.99155
cg13444392	-0.139125	1.74878e-05	0.0713304	0.0652457		-0.138095	2.05556e-05	0.0403692	0.430799	0.0624018	0.367488
cg13471374	0.124479	1.00481e-06	0.0528233	0.0772221		0.123201	1.06498e-06	0.0850267	0.0268371	-0.0734977	0.173418
cg13502545	-0.0594587	0.00459847	-0.0423107	0.102834		-0.0595382	0.00357846	-0.121098	0.000236682	0.156488	0.000438662
cg13532410	-0.111956	0.000523221	0.0768522	0.0495049		-0.111023	0.000497222	-0.0032033	0.94955	0.163454	0.0176929
cg13642800	0.052256	3.89937e-05	-0.0657771	1.23737e-05		0.0522211	3.91383e-05	-0.0617737	0.00156595	-0.00873534	0.748528
cg13709054	0.0712088	0.00114763	-0.0245302	0.349076		0.0711942	0.00115203	-0.0230436	0.508086	-0.00306692	0.948362
cg13849727	0.107724	2.41188e-05	-0.103323	0.00048467		0.108119	1.88628e-05	-0.0665888	0.0788489	-0.0847254	0.116884
cg13852730	-0.0623197	0.0066921	0.022096	0.432454		-0.0616916	0.00630271	-0.0479773	0.182859	0.141714	0.0037485
cg14007706	-0.086616	3.81914e-05	-0.0893193	0.000369097		-0.0864523	3.25997e-05	-0.133379	4.01753e-05	0.0928825	0.0374619
cg14065224	-0.082978	0.0028794	0.0259774	0.448834		-0.0822664	0.00306339	-0.0224495	0.622001	0.0949423	0.119547
cg14153876	0.0612313	0.0035391	-0.0139981	0.581326		0.0613182	0.00344089	-0.0247937	0.469546	0.0217237	0.637026
cg14312334	0.0859398	9.00027e-05	-0.0838722	0.00103449		0.0859097	7.8605e-05	-0.0562796	0.0823549	-0.0658832	0.157888
cg14412794	-0.163995	2.55278e-07	-0.0260844	0.504187		-0.164516	1.2078e-07	-0.148626	0.00251166	0.236844	0.000327101
cg14414124	-0.0856497	0.000317762	0.107652	0.000143395		-0.0862775	0.000179523	0.189161	9.96948e-08	-0.17669	0.000346756
cg14429979	-0.0736314	0.0207531	-0.117759	0.00288678		-0.0776452	0.0133318	-0.22504	8.99799e-06	0.206873	0.00236731
cg14430629	-0.02207	0.185085	0.00281549	0.890366		-0.0216949	0.171496	-0.0748074	0.00316178	0.156433	5.44324e-06
cg14487577	-0.0977717	0.0144962	0.0678561	0.185296		-0.0985094	0.0125802	-0.0757122	0.255741	0.263214	0.00262074
cg14606129	-0.136544	0.000338896	-0.0750537	0.0934462		-0.136517	0.00030883	-0.148789	0.00925608	0.157743	0.046275
cg14614754	-0.169298	0.000118687	-0.114129	0.0299781		-0.169619	8.79351e-05	-0.239158	0.000364405	0.262237	0.00440854
cg14681176	0.0820667	0.000224081	-0.0717736	0.00460417		0.0821337	0.000150172	-0.0195384	0.541474	-0.12567	0.00634869
cg14778576	-0.0423461	0.0245293	-0.0751825	0.000884212		-0.043126	0.0194581	-0.135161	2.76526e-06	0.121584	0.00199254
cg14781190	0.0703408	0.00359108	-0.0664825	0.020811		0.0692443	0.00399677	-0.0240042	0.517597	-0.0884143	0.0819281
cg14787287	-0.0523752	0.0233248	0.0608803	0.0264315		-0.0516223	0.025352	0.0359208	0.314247	0.0523677	0.286438
cg14860917	-0.0610711	0.000780447	0.0969892	7.18887e-06		-0.0614176	0.00064783	0.131044	2.68667e-06	-0.0735399	0.0574341
cg14878128	-0.129485	0.0125046	-0.00950946	0.882876		-0.131348	0.00915105	-0.22695	0.00394613	0.427016	6.80102e-05
cg14910395	-0.0274377	0.0492907	0.0186869	0.256346		-0.0277794	0.0456983	0.0337511	0.115831	-0.0326013	0.273397
cg15009352	0.05895	0.00276915	0.0353686	0.133573		0.0589346	0.00274614	0.0270507	0.394165	0.0168222	0.694174
cg15034413	-0.0671473	0.000981997	0.044296	0.0804896		-0.0656166	0.000941865	-0.0340816	0.290529	0.155406	0.000365393
cg15110219	-0.0091471	0.740752	0.0699346	0.0454157		-0.00711731	0.786889	-0.0734993	0.0847529	0.279643	1.18353e-06
cg15369419	0.187634	1.30157e-08	-0.0963201	0.0109873		0.18824	6.32712e-09	-0.0352333	0.453391	-0.151961	0.0263065
cg15386853	-0.0427365	0.0307428	-0.0406153	0.0935078		-0.0430582	0.0239671	-0.121916	6.24786e-05	0.164074	7.37414e-05
cg15433604	0.234915	9.2029e-08	0.0191318	0.716431		0.234647	9.93979e-08	0.0810774	0.2419	-0.120548	0.193385
cg15464363	0.0714678	0.00360336	-0.00815344	0.782138		0.0715595	0.00354501	-0.0140382	0.721276	0.0121516	0.820174
cg15587018	0.032751	0.00679408	-0.00222003	0.877234		0.0326672	0.00689116	0.00356613	0.849948	-0.0123917	0.634317
cg15734706	0.11581	3.88821e-09	-0.00460294	0.845416		0.115766	3.99051e-09	0.0029431	0.926206	-0.0150785	0.724147
cg15874144	0.0528805	0.0138438	-0.133672	1.23867e-07		0.0528897	0.0138253	-0.133427	4.09592e-05	-0.000554137	0.990349
cg15911114	-0.116729	0.0115494	0.0492394	0.372137		-0.115076	0.0126121	-0.0211783	0.764809	0.148127	0.127524
cg16157016	0.0585382	0.00984313	-0.0383934	0.139212		0.0579191	0.00893498	0.0130965	0.692638	-0.120313	0.0106035
cg16261572	-0.0508032	0.00952588	0.0409317	0.0741439		-0.0513202	0.00864173	0.0567472	0.05822	-0.0341851	0.409458
cg16278828	0.172465	7.29492e-11	-0.196501	2.74983e-10		0.171139	1.01849e-10	-0.222696	5.1001e-09	0.065003	0.248252
cg16280946	0.087774	5.68743e-06	-0.0985346	1.69231e-05		0.0875042	4.28467e-06	-0.0555177	0.0573717	-0.0953008	0.0198437
cg16385237	0.0648864	0.0125069	0.00205524	0.947844		0.0647272	0.0120087	0.0642209	0.118529	-0.123116	0.0268939
cg16494843	0.133773	0.000180041	-0.143822	0.000448597		0.134243	0.000150785	-0.101878	0.0477517	-0.101836	0.17129
cg16555896	-0.046464	0.0461364	0.0686161	0.0132989		-0.0478818	0.0380665	0.106322	0.00361619	-0.0802672	0.108806
cg16677528	-0.0285027	0.0582507	0.0536406	0.00254995		-0.0281714	0.0612201	0.0431635	0.0619166	0.0224944	0.482092
cg16681031	0.0447048	0.0292862	-0.0415287	0.0818024		0.0445703	0.0294003	-0.0300592	0.324544	-0.0264853	0.542771
cg16724696	0.0517172	0.0217305	0.00491504	0.856293		0.0517863	0.021364	-0.00603748	0.868859	0.0221464	0.652967
cg16754643	0.186202	2.83131e-07	-0.214332	4.06166e-07		0.188573	9.75161e-08	-0.127326	0.0147816	-0.209702	0.00545569
cg16834212	-0.0978837	4.24732e-06	0.172509	7.57095e-12		-0.0975647	4.12367e-06	0.201677	4.41654e-10	-0.0645749	0.153971
cg17287155	-0.252673	9.93105e-11	0.127205	0.0084858		-0.251956	1.1919e-10	0.103356	0.126536	0.0439773	0.617734
cg17306814	-0.046915	0.0460051	0.112495	7.37108e-05		-0.0483405	0.0377767	0.153517	4.67096e-05	-0.0857183	0.093947
cg17448109	-0.0167207	0.38196	0.0322158	0.161575		-0.0175303	0.356896	0.0555988	0.0705035	-0.0486674	0.246298
cg17628700	0.0788774	2.60542e-06	0.00732498	0.716414		0.0787848	2.60905e-06	0.0218102	0.414599	-0.0297083	0.413207
cg17727418	0.0834748	0.000708944	-0.167629	8.44924e-09		0.083656	0.000670068	-0.149079	6.80844e-05	-0.0414979	0.430717
cg17750043	-0.0383483	0.0967721	0.0763813	0.00650278		-0.0367268	0.108887	0.0222771	0.540958	0.109044	0.02717
cg17820989	0.110762	1.37128e-05	-0.0507864	0.100494		0.111054	1.26507e-05	-0.0642678	0.130939	0.0261288	0.642436
cg17842912	0.051483	0.0195305	-0.0679033	0.00809888		0.0514969	0.0184492	-0.0391135	0.234519	-0.0664024	0.155152
cg17872658	-0.0550207	0.000571247	0.0731386	0.000121384		-0.0547759	0.000608225	0.065162	0.00918671	0.0167903	0.625248
cg17998283	-0.0882271	0.0130385	0.135768	0.00140107		-0.0868282	0.0145163	0.0965891	0.0783627	0.0834404	0.269594
cg18075287	0.0511376	0.0235786	-0.0346453	0.201979		0.0511351	0.0236028	-0.0344646	0.340541	-0.00037192	0.993961
cg18118795	-0.117613	0.000253096	0.0521777	0.174683		-0.116586	0.000233426	-0.0226417	0.645698	0.159549	0.0191569
cg18205465	-0.167058	9.38922e-07	0.241907	4.98987e-10		-0.16797	8.33108e-07	0.230476	1.5393e-06	0.029336	0.68103
cg18206858	-0.00344676	0.916933	0.00564828	0.884486		-0.00331585	0.920131	-0.00588611	0.907727	0.0246194	0.726177
cg18311516	0.0657842	0.00353565	-0.0204665	0.43653		0.0653358	0.00294787	0.0354937	0.291834	-0.128493	0.00673895
cg18461093	0.0243265	0.0635667	-0.081397	1.62479e-07		0.0241395	0.0639935	-0.0628022	0.00180348	-0.0403907	0.148734
cg18499636	-0.0492742	0.00697422	-0.00490108	0.81988		-0.0492876	0.00696747	-0.00419723	0.881891	-0.00149391	0.969429
cg18748085	-0.0613173	0.0319268	0.00599801	0.867193		-0.062223	0.0245084	-0.119603	0.00812446	0.240467	6.65668e-05
cg18766608	-0.0599547	0.0116923	0.0434486	0.131011		-0.0592157	0.0122461	-0.00620929	0.868481	0.0996043	0.0492539
cg18821320	-0.089232	5.8398e-05	0.246942	5.46125e-22		-0.0867983	9.01846e-05	0.277141	1.52737e-18	-0.0724819	0.11527
cg18824724	-0.0500236	0.0555728	0.0869312	0.00561462		-0.0493127	0.0592602	0.0655771	0.108212	0.0452143	0.420581
cg18831262	0.0944317	1.13905e-05	0.0495178	0.0555184		0.0943612	1.13841e-05	0.0424004	0.226003	0.0142383	0.762198
cg18910630	-0.0664541	0.00127365	0.0813733	0.00129396		-0.0650565	0.001251	0.0123688	0.701917	0.139712	0.00144385
cg19134728	-0.042259	0.0610335	0.0165777	0.551876		-0.0421489	0.0591319	-0.0414656	0.25842	0.113384	0.0209691
cg19153095	-0.07291	0.101247	0.0460315	0.421549		-0.0734215	0.089115	-0.154143	0.028224	0.378644	6.26329e-05
cg19165344	0.0839186	2.83262e-05	-0.0757656	0.00138327		0.0836351	2.26773e-05	-0.0327952	0.27988	-0.0950418	0.0250395
cg19418648	-0.0557085	0.0179958	0.0109949	0.701914		-0.0549246	0.0150469	-0.0875839	0.0141462	0.202579	3.38108e-05
cg19435453	0.134922	0.000172808	-0.167176	6.68696e-05		0.133842	0.000198137	-0.196496	0.000141314	0.0708818	0.347262
cg19615731	-0.0944765	0.000915536	0.101832	0.00293473		-0.0934345	0.0010466	0.073991	0.0986	0.0583982	0.344476
cg19834585	-0.0353597	0.15667	-0.00169901	0.956102		-0.0350115	0.139393	-0.123516	0.0010168	0.247067	1.51895e-06
cg19889666	-0.0275913	0.132059	0.0224365	0.318231		-0.0265826	0.128002	-0.0628686	0.0241234	0.172101	5.73596e-06
cg19998148	0.0271428	0.415016	-0.13595	0.000882121		0.0253229	0.448436	-0.102954	0.06211	-0.0640556	0.383472
cg20014778	0.0507297	0.0417015	-0.0400778	0.185629		0.0505207	0.0425645	-0.0233143	0.563338	-0.0339351	0.533488
cg20152152	0.0652084	0.00193083	-0.0583093	0.0168553		0.0652983	0.00179033	-0.0372436	0.22774	-0.0501933	0.258181
cg20297940	0.0669194	5.56126e-05	-0.0552459	0.00496142		0.0669275	5.37851e-05	-0.0449318	0.0792957	-0.022581	0.527763
cg20330023	-0.0118308	0.43255	0.0298276	0.103661		-0.010951	0.454094	-0.0247612	0.283487	0.113472	0.000344842
cg20445034	0.093303	2.42913e-05	0.0123569	0.638694		0.0927104	2.32627e-05	0.041647	0.218777	-0.0668171	0.162
cg20536794	-0.0457563	0.0793141	0.0713273	0.0304021		-0.0450968	0.0767004	-0.030982	0.468081	0.192894	0.000638815
cg20665002	0.0690691	0.000213382	-0.025789	0.251642		0.0689248	0.000220884	-0.0174665	0.564414	-0.0166174	0.682403
cg20752695	-0.0807484	0.00700134	-0.0477548	0.193313		-0.0816358	0.00422521	-0.18706	3.02691e-05	0.281354	4.39271e-06
cg20758953	-0.0897193	8.61768e-05	0.0507629	0.0593568		-0.0911156	5.35278e-05	0.0938903	0.00844154	-0.0904834	0.0609065
cg20986608	0.0659966	0.00037549	-0.0390999	0.069688		0.0656682	0.000348327	-0.0104343	0.704493	-0.0663818	0.0904282
cg21223803	-0.0172726	0.365196	0.0231467	0.323622		-0.0164616	0.374685	-0.0469019	0.116048	0.141528	0.000481653
cg21539981	0.130097	1.50231e-05	-0.127615	0.000387398		0.128618	1.81314e-05	-0.172823	0.000105829	0.103928	0.105658
cg21696055	-0.0202496	0.233802	0.0196116	0.347934		-0.0195631	0.237074	-0.0425728	0.10921	0.125748	0.000500644
cg21734175	-0.0941394	0.000684862	-0.0358815	0.277783		-0.0931657	0.000496545	-0.135609	0.000994227	0.214168	0.0001799
cg21889116	0.0605033	0.00525682	-0.0204047	0.433261		0.060593	0.00513907	-0.0299536	0.397028	0.018882	0.68877
cg22123804	0.191914	5.4999e-07	-0.155864	0.000600748		0.192142	4.77758e-07	-0.121183	0.0351293	-0.0808659	0.324986
cg22153062	0.121511	8.97076e-10	-0.0971901	4.82877e-05		0.120557	6.57504e-10	-0.0454923	0.141543	-0.10683	0.0115299
cg22403782	-0.122723	1.29321e-05	0.0442555	0.186519		-0.122221	1.18157e-05	-0.000129684	0.997632	0.0959515	0.112052
cg22857604	0.0650984	0.0056311	-0.00249375	0.930353		0.0652005	0.00531922	-0.0298153	0.448467	0.0531451	0.307285
cg23008083	-0.0604584	0.0134561	0.024226	0.410027		-0.0602339	0.0137583	-0.000700785	0.985716	0.0501932	0.343114
cg23117592	0.249068	5.30614e-10	-0.153528	0.00084804		0.248814	5.72746e-10	-0.168295	0.00256486	0.0389304	0.64441
cg23170535	-0.0419941	0.0576001	0.0279286	0.311875		-0.0418677	0.0533647	-0.0501651	0.160348	0.150853	0.00153142
cg23208326	-0.158315	1.09167e-05	7.39986e-05	0.998575		-0.158162	1.12925e-05	-0.00479745	0.928527	0.0107638	0.885816
cg23243012	0.123624	1.49037e-06	-0.0790735	0.0114424		0.121673	1.36098e-06	-0.163076	2.51546e-05	0.17775	0.00107702
cg23252848	0.0835613	1.29978e-06	-0.007494	0.719469		0.083429	1.3587e-06	0.00327228	0.906467	-0.0217647	0.562972
cg23313266	-0.0573956	0.046334	-0.129993	0.000221788		-0.0613608	0.0210801	-0.293801	6.97498e-13	0.337707	2.30388e-09
cg23348743	-0.0572844	0.0059356	0.0288502	0.246644		-0.0565716	0.00614471	-0.0125827	0.693681	0.088335	0.0455589
cg23430209	0.0687566	0.00266607	-0.0306118	0.253438		0.068905	0.00261616	-0.0452203	0.184575	0.0330087	0.494295
cg23463205	0.16677	9.43053e-06	-0.155087	0.000438905		0.166623	9.61267e-06	-0.179152	0.00119557	0.0572096	0.473844
cg23473088	-0.0473732	0.0428116	-0.0124987	0.664937		-0.0471323	0.0337923	-0.126379	0.000284485	0.232181	1.11908e-06
cg23516342	-0.112114	0.0154222	0.00630565	0.908224		-0.111504	0.015742	-0.0508699	0.471647	0.123601	0.206061
cg23555340	0.0870155	2.41159e-06	0.0183646	0.40399		0.0869397	2.42163e-06	0.033536	0.245327	-0.0318486	0.421087
cg23817637	-0.224688	6.34398e-05	-0.170029	0.0109871		-0.225087	4.17671e-05	-0.345333	4.80096e-05	0.37159	0.00147738
cg23879460	-0.0605736	0.00198685	0.0216104	0.362338		-0.0601327	0.00194705	-0.0208315	0.50188	0.086273	0.0402352
cg23963476	-0.0805524	0.000140031	0.0218461	0.382442		-0.0803354	0.000146953	0.0122977	0.707361	0.020169	0.653855
cg24162965	0.112738	2.86436e-07	-0.0693938	0.00775106		0.112898	2.66547e-07	-0.09284	0.00485231	0.0532579	0.257193
cg24340655	-0.0514076	0.0704113	0.0899286	0.0111966		-0.0497119	0.0720288	-0.0255699	0.569396	0.223895	0.000203207
cg24379915	-0.124567	0.000256028	0.0747709	0.0743535		-0.123574	0.000239874	-0.0244273	0.652029	0.195137	0.00755953
cg24385334	0.111226	1.83886e-05	-0.0739904	0.0191789		0.109603	2.36686e-05	-0.0317777	0.436384	-0.0870063	0.118349
cg24408603	0.067154	0.0145647	-0.0585504	0.0788045		0.0668069	0.0151792	-0.0391684	0.382448	-0.0380994	0.524955
cg24412117	-0.08117	0.000297976	0.214854	8.1886e-16		-0.0789687	0.000408754	0.25391	3.151e-14	-0.0877169	0.0646127
cg24732062	0.0519575	0.00846624	-0.10256	1.05497e-05		0.0520975	0.0080369	-0.0834555	0.00535134	-0.0428816	0.30945
cg24790419	-0.0801872	7.48407e-05	-0.0129192	0.583059		-0.0810978	4.46623e-05	0.0340439	0.262069	-0.102913	0.0144972
cg24865495	0.14193	2.97836e-10	-0.0450854	0.0874528		0.141979	1.30194e-10	0.00204184	0.951656	-0.110201	0.0214318
cg24876404	-0.0685622	0.110811	-0.0298408	0.570583		-0.0682658	0.0940554	-0.230446	0.000199455	0.422341	1.04677e-06
cg24926253	0.102974	0.00041559	-0.0427274	0.216995		0.102838	0.000418478	-0.0328617	0.459953	-0.0222622	0.722794
cg25147684	-0.0600529	0.00342193	-0.0442533	0.0771998		-0.0604852	0.00221786	-0.129611	3.88291e-05	0.171064	6.09442e-05
cg25265930	0.136798	5.2617e-05	-0.21539	1.58608e-07		0.136917	5.23381e-05	-0.219106	8.59021e-05	0.0073446	0.921517
cg25295726	0.0553137	0.0144237	-0.0163899	0.546752		0.0551311	0.0147183	0.00452949	0.900669	-0.0420508	0.391041
cg25371449	0.0648394	0.0022312	-0.0605732	0.012318		0.0647645	0.00193037	-0.0230078	0.453296	-0.0892012	0.0426555
cg25428612	-0.0477186	0.00853526	0.0814489	0.000112073		-0.0491589	0.00591102	0.120401	8.69915e-06	-0.0865027	0.0223208
cg25468907	-0.013833	0.514157	-0.0162949	0.535017		-0.0138904	0.50002	-0.0987535	0.00295891	0.164508	0.000256457
cg25490241	-0.0710215	0.0198859	0.0197377	0.595183		-0.069764	0.0202984	-0.0746733	0.114649	0.187434	0.00339648
cg25618672	0.116491	0.00081807	-0.177123	7.85628e-06		0.116811	0.0007893	-0.170413	0.00047279	-0.0175141	0.810893
cg25673945	0.0620548	5.8606e-06	-0.0403223	0.0132815		0.0621069	5.74263e-06	-0.0444715	0.0364957	0.00891641	0.762006
cg25680105	0.229129	1.16042e-06	-0.206116	0.000252727		0.229376	1.03994e-06	-0.162911	0.023845	-0.0963671	0.34229
cg25747655	-0.0740563	1.43012e-05	-0.0357001	0.0805018		-0.0738618	1.06045e-05	-0.0825384	0.0016164	0.097781	0.00644146
cg25766801	-0.0399651	0.0356714	0.00873087	0.706224		-0.0397769	0.0339892	-0.0428946	0.154458	0.103757	0.0109443
cg25987208	0.15646	2.57031e-06	0.041055	0.299562		0.156317	2.17122e-06	0.108294	0.0341759	-0.141409	0.0443416
cg26177629	-0.146947	1.0649e-05	0.242031	4.41569e-10		-0.145807	1.29647e-05	0.25905	7.02406e-08	-0.0415572	0.5535
cg26346930	-0.0653918	0.0136162	0.0590849	0.064448		-0.0653442	0.01372	0.056337	0.194283	0.00540524	0.925581
cg26741280	0.0548671	0.0094419	0.00295135	0.908058		0.0548282	0.00950397	0.0137252	0.688838	-0.0215704	0.640046
cg26900750	0.0896431	0.000340541	-0.0210195	0.48846		0.0898433	0.000315675	-0.0427679	0.303922	0.0426168	0.439827
cg26923014	0.108099	5.96795e-06	-0.12872	5.13189e-06		0.108143	5.8175e-06	-0.120152	0.000934273	-0.0191352	0.707882
cg27063327	-0.0325434	0.204333	-0.0748506	0.0198124		-0.0349606	0.150362	-0.209777	5.21197e-08	0.266865	3.61673e-07
cg27074221	-0.0832983	0.0234448	0.103349	0.0255963		-0.0818525	0.0248273	0.00880622	0.884705	0.181889	0.0244759
cg27118937	0.0285958	0.214339	-0.0889784	0.000845533		0.0286823	0.212358	-0.0806368	0.017054	-0.0196195	0.685873
cg27130993	-0.0839432	0.0467108	-0.0207748	0.682681		-0.0826722	0.0421118	-0.181191	0.00361312	0.342935	7.65025e-05
cg27182159	-0.0942792	0.0095288	0.083685	0.0575506		-0.0928926	0.00916088	-0.0212079	0.703774	0.219452	0.00429047
cg27194586	0.0686801	0.0108468	-0.040564	0.20806		0.0686023	0.0109728	-0.0357491	0.408225	-0.00970634	0.86767
cg27536870	-0.0250544	0.140311	0.0506649	0.0132208		-0.024307	0.148675	0.0139251	0.599626	0.0758176	0.0358579
cg27551895	0.058464	0.0267116	-0.035792	0.260119		0.0583807	0.0269997	-0.0293149	0.490388	-0.0130927	0.819197
cg27640712	0.0935277	0.00520778	-0.119289	0.00272954		0.0934338	0.0052296	-0.107128	0.0389299	-0.0262899	0.715004
Supplemental Table 5. Full moderated beta regression results for all 909 loci regressed against mMTHFR and smoking (Model 1) and against mMTHFR, smoking, and their interaction (Model 2). In each model age and gender were included as controls. Results were corrected for multiple comparisons using the Bonferroni method.
